# Supplementary material for: Protein interactions, network pharmacology, and machine learning work together to predict genes linked to mitochondrial dysfunction in hypertrophic cardiomyopathy
Source: Research Square preprint supplement (doi:10.21203/rs.3.rs-5122992/v1), 2025-03-24
Supplement: Supplementary file 1 [file 078804fd63f425e83b4661f2.docx]

library(limma)

library(ggplot2) #用于绘制火山图

library(pheatmap) #用于绘制热图

# 输入表达矩阵和分组文件 -------------------------------------------------------------

expr_data<-read.table("Matrix_of_expression.txt",header = T,

row.names = 1,sep = "\t")

group<-read.csv("group.csv",header = T,row.names = 1,sep = ",")

# #构建分组矩阵--design ---------------------------------------------------------

design <- model.matrix(~0+factor(group$group))

colnames(design) <- levels(factor(group$group))

rownames(design) <- colnames(expr_data)

# #构建比较矩阵——contrast -------------------------------------------------------

contrast.matrix <- makeContrasts(Tumor-Normal,levels = design)

# #线性拟合模型构建 ---------------------------------------------------------------

fit <- lmFit(expr_data,design) #非线性最小二乘法

fit2 <- contrasts.fit(fit, contrast.matrix)

fit2 <- eBayes(fit2)#用经验贝叶斯调整t-test中方差的部分

DEG <- topTable(fit2, coef = 1,n = Inf)

DEG$regulate <- ifelse(DEG$P.Value > 0.05, "unchanged",

ifelse(DEG$logFC > 1, "up-regulated",

ifelse(DEG$logFC < -1, "down-regulated", "unchanged")))

table(DEG$regulate)

write.table(data.frame(gene_symbol=rownames(DEG),DEG),file = "DEG_result.txt",

sep = "\t",quote = F,row.names = F,col.names = T)

# 区分上下调基因 -----------------------------------------------------------------

DE_1_0.05 <- DEG[DEG$P.Value<0.05&abs(DEG$logFC)>1,]

upGene_1_0.05 <- DE_1_0.05[DE_1_0.05$regulate == "up-regulated",]

downGene_1_0.05 <- DE_1_0.05[DE_1_0.05$regulate == "down-regulated",]

write.csv(upGene_1_0.05,"upGene_1_0.05.csv")

write.csv(downGene_1_0.05,"down-regulated.csv")

# 火山图的绘制 ------------------------------------------------------------------

pdf("volcano.pdf")

ggplot(DEG,aes(x=logFC,y=-log10(P.Value)))+ #x轴logFC,y轴adj.p.value

geom_point(alpha=0.6,size=3.5,aes(color=regulate))+ #点的透明度，大小

ylab("-log10(P.Value)")+ #y轴的说明

scale_color_manual(values = c("blue", "grey", "red"))+ #点的颜色

geom_vline(xintercept = c(-1,1),lty=4,col ="black",lwd=0.8)+ #logFC分界线

geom_hline(yintercept=-log10(0.05),lty=4,col = "black",lwd=0.8)+ #adj.p.val分界线

theme_bw() #火山图绘制

dev.off()

# ggvolcano绘制另一种火山图 ----------------------------------------------------------

library(ggVolcano)

Genes <- rownames(DEG)

DEG$Genes <- Genes#将行名添加为一列

ggvolcano(data = DEG,x = "logFC",y = "P.Value",label = "Genes",

label_number = 10,output = FALSE,

fills = c("#00AFBB", "#999999", "#FC4E07"),

colors = c("#00AFBB", "#999999", "#FC4E07"),

x_lab = "log2FC",

y_lab = "-Log10P.Value")

# 热图的绘制 -------------------------------------------------------------------

DEG_genes <- DEG[DEG$P.Value<0.05&abs(DEG$logFC)>1,]

DEG_gene_expr <- expr_data[rownames(DEG_genes),]

pdf("pheatmap.pdf")

pheatmap(DEG_gene_expr,

color = colorRampPalette(c("blue","white","red"))(100), #颜色

scale = "row", #归一化的方式

border_color = NA, #线的颜色

fontsize = 10, #文字大小

show_rownames = F)

dev.off()

# 加载必要的包

library(WGCNA)

library(limma)

# 读取表达数据

exprData <- read.csv("expression_data.csv", row.names = 1)

# 数据标准化（log2转换）

exprData <- log2(exprData + 1)

# 去除批次效应（如果有）

exprData <- removeBatchEffect(exprData, batch = batchInfo)

# 样本聚类和离群值检测

sampleTree <- hclust(dist(exprData), method = "average")

plot(sampleTree, main = "Sample Clustering", sub = "", xlab = "")

# 软阈值选择

powers <- c(1:20)

sft <- pickSoftThreshold(exprData, powerVector = powers, verbose = 5)

plot(sft$fitIndices[,1], -sign(sft$fitIndices[,3])*sft$fitIndices[,2],

xlab = "Soft Threshold (power)", ylab = "Scale Free Topology Model Fit")

# 构建邻接矩阵和TOM矩阵

adjacency <- adjacency(exprData, power = sft$powerEstimate)

TOM <- TOMsimilarity(adjacency)

dissTOM <- 1 - TOM

# 基因聚类和模块检测

geneTree <- hclust(as.dist(dissTOM), method = "average")

dynamicMods <- cutreeDynamic(dendro = geneTree, distM = dissTOM,

minClusterSize = 30, deepSplit = 2)

moduleColors <- labels2colors(dynamicMods)

# 计算模块特征基因（eigengenes）

MEs <- moduleEigengenes(exprData, colors = moduleColors)$eigengenes

# 模块与性状的相关性分析

traitData <- read.csv("clinical_traits.csv")

moduleTraitCor <- cor(MEs, traitData, use = "p")

moduleTraitPvalue <- corPvalueStudent(moduleTraitCor, nSamples)

# 可视化模块-性状关系

heatmapData <- data.frame(Correlation = as.vector(moduleTraitCor),

Pvalue = as.vector(moduleTraitPvalue))

ggplot(heatmapData, aes(x = Module, y = Trait, fill = Correlation)) +

geom_tile() +

scale_fill_gradient2(low = "blue", high = "red", mid = "white")

# 计算基因显著性（GS）和模块成员（MM）

geneSignificance <- as.data.frame(cor(exprData, traitData, use = "p"))

moduleMembership <- as.data.frame(cor(exprData, MEs, use = "p"))

# 识别hub基因

hubGenes <- chooseTopHubInEachModule(exprData, moduleColors) # GO和KEGG富集分析

library(clusterProfiler)

enrichGO <- enrichGO(gene = hubGenes, OrgDb = org.Hs.eg.db, ont = "BP")

enrichKEGG <- enrichKEGG(gene = hubGenes, organism = "hsa")

# 可视化富集结果

dotplot(enrichGO, showCategory = 10)

dotplot(enrichKEGG, showCategory = 10)

# 绘制基因聚类树

plotDendroAndColors(geneTree, moduleColors, "Module Colors",

dendroLabels = FALSE, hang = 0.03,

addGuide = TRUE, guideHang = 0.05)

# 模块-性状热图

labeledHeatmap(Matrix = moduleTraitCor,

xLabels = names(traitData),

yLabels = names(MEs),

colorLabels = TRUE)

library(BiocManager)

BiocManager::install("DOSE")

library("clusterProfiler")

library("org.Hs.eg.db")

library("enrichplot")

library("ggplot2")

library("pathview")

library("ggnewscale")

library("DOSE")

library(stringr)

pvalueFilter=0.05

qvalueFilter=1

showNum=20

#keggId="hsa04659"

rt=read.table("target-down-CNB.txt",sep="\t",check.names=F,header=F)

genes=as.vector(rt[,1])

entrezIDs <- mget(genes, org.Hs.egSYMBOL2EG, ifnotfound=NA)

entrezIDs <- as.character(entrezIDs)

rt=cbind(rt,entrezID=entrezIDs)

colnames(rt)=c("symbol","entrezID")

rt=rt[is.na(rt[,"entrezID"])==F,]

gene=rt$entrezID

gene=unique(gene)

colorSel="qvalue"

if(qvalueFilter>0.05){

colorSel="pvalue"

}

kk <- enrichKEGG(gene = gene, organism = "hsa", pvalueCutoff =1, qvalueCutoff =1)

KEGG=as.data.frame(kk)

KEGG$geneID=as.character(sapply(KEGG$geneID,function(x)paste(rt$symbol[match(strsplit(x,"/")[[1]],as.character(rt$entrezID))],collapse="/")))

KEGG=KEGG[(KEGG$pvalue<pvalueFilter & KEGG$qvalue<qvalueFilter),]

write.table(KEGG,file="KEGG.xls",sep="\t",quote=F,row.names = F)

if(nrow(KEGG)<showNum){

showNum=nrow(KEGG)

}

pdf(file="KEGG_barplot.pdf",width = 9,height = 7)

barplot(kk, drop = TRUE, showCategory = showNum, color = colorSel) +scale_y_discrete(labels=function(x) stringr::str_wrap(x, width=60))

dev.off()

pdf(file="KEGG_bubble.pdf",width = 9,height = 7)

dotplot(kk, showCategory = showNum, orderBy = "GeneRatio",color = colorSel)+scale_y_discrete(labels=function(x) stringr::str_wrap(x, width=60))

dev.off()

pdf(file="KEGG_cnet.pdf",width = 9,height = 8)

af=setReadable(kk, 'org.Hs.eg.db', 'ENTREZID')

cnetplot(af, showCategory = showNum, categorySize="pvalue",circular = TRUE,colorEdge = TRUE,cex_label_category=0.65,cex_label_gene=0.6)

dev.off()

pdf(file="KEGG_net.pdf",width = 9,height = 7)

x2 <- pairwise_termsim(kk)

emapplot(x2,showCategory = showNum,cex_label_category=0.65,color = "pvalue",layout ="nicely")

dev.off()

geneFC=rep(1,length(gene))

names(geneFC)=gene

pv.out=pathview(gene.data = geneFC, pathway.id = keggId, species = "hsa", out.suffix = "pathview")

p <- pathview(gene.data = geneFC, pathway.id = keggId, species = "hsa", kegg.native = F, sign.pos="bottomleft", same.layer = F)

#install.packages("caret")

#install.packages("DALEX")

#install.packages("ggplot2")

#install.packages("randomForest")

#install.packages("kernlab")

#install.packages("pROC")

#install.packages("xgboost")

# 引用已安装的 R 包

library(caret) # 用于创建预测模型

library(DALEX) # 用于解释机器学习模型

library(ggplot2) # 用于数据可视化

library(randomForest) # 用于随机森林模型

library(kernlab) # 用于支持向量机模型

library(xgboost) # 用于梯度提升模型

library(pROC) # 用于绘制 ROC 曲线

# 设置随机种子以确保结果可重复

set.seed(123)

# 定义输入文件路径

inputFile="normalize.txt" # 基因表达数据文件

geneFile="interGenes.txt" # 基因列表文件

# 设置工作目录

setwd("D:\\常用生信分析\\68.9种机器学习算法模型来筛选疾病诊断特征基因\\02.9种机器学习算法模型来筛选疾病诊断特征基因")

# 读取表达数据文件，行名为基因名称，列名为样本名称

data=read.table(inputFile, header=T, sep="\t", check.names=F, row.names=1)

# 读取基因列表文件，提取核心基因的表达数据

geneRT=read.table(geneFile, header=F, sep="\t", check.names=F)

data=data[as.vector(geneRT[,1]),] # 根据基因列表提取表达矩阵中的对应基因

row.names(data)=gsub("-", "_", row.names(data)) # 将基因名称中的 "-" 替换为 "_"

# 获取样本分组信息，并将其作为新列添加到数据框中

data=t(data) # 转置数据矩阵，使样本为行，基因为列

group=gsub("(.*)\\_(.*)", "\\2", row.names(data)) # 提取样本分组信息

data=as.data.frame(data) # 转换为数据框格式

data$Type=group # 添加样本分组信息作为数据框中的一列

# 将数据分为训练集和测试集，训练集占总样本的 70%

inTrain<-createDataPartition(y=data$Type, p=0.7, list=F)

train<-data[inTrain,] # 训练集数据

test<-data[-inTrain,] # 测试集数据

# 创建 RF 随机森林模型

control=trainControl(method="repeatedcv", number=5, savePredictions=TRUE) # 定义交叉验证方法

mod_rf = train(Type ~ ., data = train, method='rf', trControl = control)

# 创建 SVM 机器学习模型

mod_svm=train(Type ~., data = train, method = "svmRadial", prob.model=TRUE, trControl=control)

# 创建 XGB 模型

mod_xgb=train(Type ~., data = train, method = "xgbDART", trControl=control)

# 创建 GLM 模型

mod_glm=train(Type ~., data = train, method = "glm", family="binomial", trControl=control)

# 创建 KNN 模型

mod_knn=train(Type ~., data = train, method = "knn", trControl=control)

# 创建 NNET 模型

mod_nnet=train(Type ~., data = train, method = "nnet", trControl=control)

# 创建 LASSO 模型

mod_lasso=train(Type ~., data = train, method = "glmnet", trControl=control)

# 创建 DT 决策树模型

mod_dt=train(Type ~., data = train, method = "rpart", trControl=control)

# 定义预测函数，用于获取模型预测的概率

p_fun=function(object, newdata){

predict(object, newdata=newdata, type="prob")[,2]

}

yTest=ifelse(test$Type=="Control", 0, 1) # 将测试集的分类结果转换为二进制

# RF 随机森林模型预测结果

explainer_rf=explain(mod_rf, label = "RF",

data = test, y = yTest,

predict_function = p_fun,

verbose = FALSE)

mp_rf=model_performance(explainer_rf)

# SVM 机器学习模型预测结果

explainer_svm=explain(mod_svm, label = "SVM",

data = test, y = yTest,

predict_function = p_fun,

verbose = FALSE)

mp_svm=model_performance(explainer_svm)

# XGB 模型预测结果

explainer_xgb=explain(mod_xgb, label = "XGB",

data = test, y = yTest,

predict_function = p_fun,

verbose = FALSE)

mp_xgb=model_performance(explainer_xgb)

# GLM 模型预测结果

explainer_glm=explain(mod_glm, label = "GLM",

data = test, y = yTest,

predict_function = p_fun,

verbose = FALSE)

mp_glm=model_performance(explainer_glm)

# KNN 模型预测结果

explainer_knn=explain(mod_knn, label = "KNN",

data = test, y = yTest,

predict_function = p_fun,

verbose = FALSE)

mp_knn=model_performance(explainer_knn)

# NNET 模型预测结果

explainer_nnet=explain(mod_nnet, label = "NNET",

data = test, y = yTest,

predict_function = p_fun,

verbose = FALSE)

mp_nnet=model_performance(explainer_nnet)

# LASSO 模型预测结果

explainer_lasso=explain(mod_lasso, label = "LASSO",

data = test, y = yTest,

predict_function = p_fun,

verbose = FALSE)

mp_lasso=model_performance(explainer_lasso)

# DT 决策树模型预测结果

explainer_dt=explain(mod_dt, label = "DT",

data = test, y = yTest,

predict_function = p_fun,

verbose = FALSE)

mp_dt=model_performance(explainer_dt)

# 绘制残差反向累计分布图

pdf(file="residual.pdf", width=6, height=6)

p1 <- plot(mp_rf, mp_svm, mp_xgb, mp_glm, mp_knn, mp_nnet,mp_lasso,mp_dt)

print(p1)

dev.off()

# 绘制残差箱线图

pdf(file="boxplot.pdf", width=6, height=6)

p2 <- plot(mp_rf, mp_svm, mp_xgb, mp_glm, mp_knn , mp_nnet, mp_lasso, mp_dt, geom = "boxplot")

print(p2)

dev.off()

# 绘制 ROC 曲线并保存到 PDF 文件

pred1=predict(mod_rf, newdata=test, type="prob")

pred2=predict(mod_svm, newdata=test, type="prob")

pred3=predict(mod_xgb, newdata=test, type="prob")

pred4=predict(mod_glm, newdata=test, type="prob")

pred5=predict(mod_knn, newdata=test, type="prob")

pred6=predict(mod_nnet, newdata=test, type="prob")

pred7=predict(mod_lasso, newdata=test, type="prob")

pred8=predict(mod_dt, newdata=test, type="prob")

roc1=roc(yTest, as.numeric(pred1[,2])) # 计算 ROC 曲线

roc2=roc(yTest, as.numeric(pred2[,2]))

roc3=roc(yTest, as.numeric(pred3[,2]))

roc4=roc(yTest, as.numeric(pred4[,2]))

roc5=roc(yTest, as.numeric(pred5[,2]))

roc6=roc(yTest, as.numeric(pred6[,2]))

roc7=roc(yTest, as.numeric(pred7[,2]))

roc8=roc(yTest, as.numeric(pred8[,2]))

pdf(file="ROC.pdf", width=5, height=5)

plot(roc1, print.auc=F, legacy.axes=T, main="", col="red") # 绘制 ROC 曲线

plot(roc2, print.auc=F, legacy.axes=T, main="", col="blue", add=T)

plot(roc3, print.auc=F, legacy.axes=T, main="", col="green", add=T)

plot(roc4, print.auc=F, legacy.axes=T, main="", col="yellow", add=T)

plot(roc5, print.auc=F, legacy.axes=T, main="", col="orange", add=T)

plot(roc6, print.auc=F, legacy.axes=T, main="", col="purple", add=T)

plot(roc7, print.auc=F, legacy.axes=T, main="", col="black", add=T)

plot(roc8, print.auc=F, legacy.axes=T, main="", col="blue", add=T)

# 添加图例

legend('bottomright',

c(paste0('RF: ',sprintf("%.03f",roc1$auc)),

paste0('SVM: ',sprintf("%.03f",roc2$auc)),

paste0('XGB: ',sprintf("%.03f",roc3$auc)),

paste0('GLM: ',sprintf("%.03f",roc4$auc)),

paste0('KNN: ',sprintf("%.03f",roc5$auc)),

paste0('NNET: ',sprintf("%.03f",roc6$auc)),

paste0('LASSO: ',sprintf("%.03f",roc7$auc)),

paste0('DT: ',sprintf("%.03f",roc8$auc))),

lwd=2, bty="n", col=c("red", "blue", "green", "yellow", "orange", "purple", "black", "blue"))

# 关闭 PDF 输出设备

dev.off()

# 计算各模型的基因重要性评分

importance_rf<-variable_importance(

explainer_rf,

loss_function = loss_root_mean_square

)

importance_svm<-variable_importance(

explainer_svm,

loss_function = loss_root_mean_square

)

importance_glm<-variable_importance(

explainer_glm,

loss_function = loss_root_mean_square

)

importance_xgb<-variable_importance(

explainer_xgb,

loss_function = loss_root_mean_square

)

importance_knn<-variable_importance(

explainer_knn,

loss_function = loss_root_mean_square

)

importance_nnet<-variable_importance(

explainer_nnet,

loss_function = loss_root_mean_square

)

importance_lasso<-variable_importance(

explainer_lasso,

loss_function = loss_root_mean_square

)

importance_dt<-variable_importance(

explainer_dt,

loss_function = loss_root_mean_square

)

# 绘制基因重要性图形并保存为 PDF 文件

pdf(file="importance.pdf", width=7, height=14)

plot(importance_rf[c(1,(ncol(data)-8):(ncol(data)+1)),],

importance_svm[c(1,(ncol(data)-8):(ncol(data)+1)),],

importance_xgb[c(1,(ncol(data)-8):(ncol(data)+1)),],

importance_knn[c(1,(ncol(data)-8):(ncol(data)+1)),],

importance_nnet[c(1,(ncol(data)-8):(ncol(data)+1)),],

importance_lasso[c(1,(ncol(data)-8):(ncol(data)+1)),],

importance_dt[c(1,(ncol(data)-8):(ncol(data)+1)),],

importance_glm[c(1,(ncol(data)-8):(ncol(data)+1)),])

dev.off()

# 输出重要性评分最高的基因到文本文件中

geneNum=5 # 设置输出基因的数量

write.table(importance_rf[(ncol(data)-geneNum+2):(ncol(data)+1),], file="importanceGene.RF.txt", sep="\t", quote=F, row.names=F)

write.table(importance_svm[(ncol(data)-geneNum+2):(ncol(data)+1),], file="importanceGene.SVM.txt", sep="\t", quote=F, row.names=F)

write.table(importance_xgb[(ncol(data)-geneNum+2):(ncol(data)+1),], file="importanceGene.XGB.txt", sep="\t", quote=F, row.names=F)

write.table(importance_glm[(ncol(data)-geneNum+2):(ncol(data)+1),], file="importanceGene.GLM.txt", sep="\t", quote=F, row.names=F)

write.table(importance_knn[(ncol(data)-geneNum+2):(ncol(data)+1),], file="importanceGene.KNN.txt", sep="\t", quote=F, row.names=F)

write.table(importance_nnet[(ncol(data)-geneNum+2):(ncol(data)+1),], file="importanceGene.NNET.txt", sep="\t", quote=F, row.names=F)

write.table(importance_lasso[(ncol(data)-geneNum+2):(ncol(data)+1),], file="importanceGene.LASSO.txt", sep="\t", quote=F, row.names=F)

write.table(importance_dt[(ncol(data)-geneNum+2):(ncol(data)+1),], file="importanceGene.DT.txt", sep="\t", quote=F, row.names=F)

rm(list = ls())

install.packages(c("dplyr","tidyverse","reshape2","pals","pheatmap","ggpubr","corrplot","devtools"))

library(dplyr)

library(tidyverse)

library(reshape2)

library(pals)

library(pheatmap)

library(ggpubr)

library(corrplot)

library(devtools)

setwd("C:/Users/22593/Desktop/心梗生信+新冠")

library(usethis)

library('devtools')

devtools::install_github("Moonerss/CIBERSORT")

library(CIBERSORT)

library(ggplot2)

DEG_expr <- read.csv("AMI-CAD-EXP.csv",row.names = 1)

group <- read.csv("Group.csv")

boxplot(DEG_expr,outline = F,notch = F,las=2)

data(LM22)

sig_matrix <- system.file("extdata", "LM22.txt", package = "CIBERSORT")

result <- cibersort(sig_matrix = LM22,mixture_file = DEG_expr,perm = 0, QN = T)

results <- cibersort(sig_matrix, DEG_expr,perm = 0,QN = T)

rm(list=ls())

library(glmnet)

library(readxl)

library(plyr)

library(caret)

library(corrplot)

library(ggplot2)

library(Hmisc)

library(openxlsx)

data<-read.xlsx("Blue-AAA-exp.xlsx")

x<-as.matrix(data[,-c(1:2)])

y<-as.double(data$Group)

###下面三个要一起运行

fit<- glmnet(x,y,family = "binomial",nlambda = 1000, alpha = 1)

print(fit)

plot(fit,xvar = "lambda")

lasso_fit<-cv.glmnet(x,y,family="binomial",alpha = 1, type.measure = "auc",nlambda=1000)

plot(lasso_fit)

print(lasso_fit)

lasso_best <- glmnet(x=x, y=y, alpha = 1, lambda=lasso_fit$lambda.min)

coef(lasso_best)

coefficient<-coef(lasso_best,s=lasso_best$lambda.min)

coe<-coefficient@x

coe<-as.data.frame(coe)

Active_Index <- which(as.numeric(coefficient)!=0)

active_coefficients<-as.numeric(coefficient)[Active_Index]

variable<-rownames(coefficient)[Active_Index]

variable<-as.data.frame(variable)

variable<-cbind(variable,coe)

View(variable)

write.csv(variable,"variable-lasso.csv")

install.packages("randomForest")

library(randomForest)

library(ggplot2)

mydata <- read.csv("Blue-AAA-exp.csv",row.names = 1)

y<- mydata[,1]

x<- mydata[,-1]

set.seed(12345)

rf_model <- randomForest(x,

y,

ntree = 1000,

importance = TRUE)

varImpPlot(rf_model,

type=1,#1或2

main="Variable Importance",

n.var = 20,#top变量个数

scale = T,#是否显示横坐标

cex=1.2)

#MSE代表均方差误差，MSE越小，模型预测能力越好

#%INCMSE(INCREASE IN MSE%)越高，变量越重要

varImpPlot(rf_model,

type=2,#1或2

main="Variable Importance",

n.var = 20,#top变量个数

scale = T,#是否显示横坐标

cex=1.2)

#IncNodePurity越高越好，越重要

#用于衡量将变量添加到节点后带来的收益大小，即对节点纯度的提升。

#这个是基于基尼系数计算的值，而基尼系数越大，代表分出的类不确定性较大，效果越不好

varImpPlot(rf_model,

n.var = 25,

cex=1.2)

#提取变量的重要性

importance <- importance(rf_model)

#提取%INCMSE前10的变量

importance <- as.data.frame(importance)

top10_IncMSE <- head(rownames(importance[order(-importance$"%IncMSE"),]),10)

top10_IncMSE

#提取%IncNodePurity前10的变量

top10_ncNodePurity <-head(rownames(importance[order(-importance$"IncNodePurity"),]),10)

top10_ncNodePurity#这个更常用

#构建筛选获得变量的表达谱矩阵

top10_ncNodePurity_data<-mydata[,top10_ncNodePurity]

top10_IncMSE_data<-mydata[,top10_IncMSE]

write.csv(top10_IncMSE_data,"top10_IncMSE_data.csv")

write.csv(top10_ncNodePurity_data,"top10_ncNodePurity_data.csv")

rm(list=ls())

library(e1071)

library(pROC)

library(ggplot2)

library(caret)

mydata <- read.csv("Blue-AAA-exp.csv",row.names = 1)

#简单的数据清洗（如果必要再用以下代码）

#mydata <- subset(mydata，select = -time)#删除time这一列

#因变量

#mydataSstatus <- factor(ifelse(mydataSstatus == "Dead",1,0)) #死亡为1，存活为0

#将二分类变量中的字符转变成数字

#mydata$gender <- ifelse(mydata$gender "female",0,1)

#mydata$type <- ifelse(mydata$type == "squamous carcinom"，0，1)

#mydata$smoker <- ifelse(mydata$smoker == "nonsmoker"，0，1)

#mydata$alcohol_history <- ifelse(mydata$alcohol_history == "No"，0，1)

#SVM对数值敏感，二分类变量输入会让结果出现很大波动

table(mydata$Group)

x <- mydata[,2:45]#定义预测变量即从第几列到第几列是数值变量

y <- as.numeric(as.factor(mydata$Group))#定义预测变量及分组GROUP，

#如果是MI就是MI，如果是AAA那就是是AAA

#设置重复交叉验证

control <- trainControl(method = "repeatedcv",

#交叉验证方法，这里选重复K折交叉验证

number = 10,

#k值，将数据分成5份，可以根据样本量选择5-10

repeats = 5,

#重复次数，可以选2-5次

search = "random")

#选择重复交叉验证时，方式可以选systematic或者random

#适应SVM-RFE特征选择方法

set.seed(12345)

svm_rfe <- rfe(x,

y,

sizes = 1:5,

#size=1:20,算法会考虑选择1个特征，2个特征，直到选20个特征

#一般选择1-10个特征

rfeControl = rfeControl(functions = caretFuncs,

method = "repeatedcv",

number = 10,

repeats = 5,

#10折交叉验证，重复5次

verbose = FALSE),

method = "svmLinear",

trControl = control,

preProc = c("center","scale")

)

svm_rfe_ranking <- svm_rfe$variables

head(svm_rfe_ranking)

#overall:特征的总体重要性评分,越高表示该特征对模型性能贡献越大,重要性越高

#var: 特征的名称。

#Variables:特征数量,显示在选取该数量特征时,各特征的重要性评分。这里显示在选择25时

#Resample:如果进行了交又验证,显示交又验证的fold信息。这里显示为Fold1.Rep1

varImp(svm_rfe)#查看变量最重要性评分

varImp_dataframe <- data.frame(Gene = row.names(varImp(svm_rfe))[1:20],

importance = varImp(svm_rfe)[1:20,1])

varImp_dataframe <- na.omit(varImp_dataframe)

#绘制柱状图

mycolor <- c("#D4E2A7","#88D7A4","#A136A1","#BAE8BC","#C757AF",

"#DF9FCE","#9FDFDF","#DAD490","#A7DCE2","#D5E1F1",

"#305691","#B6C2E7",

"#E8EFF7","#EEE0F5","#267336","#372E8A","#4C862D",

"#AFDE9C","#98CEDD","#CDE2EE","#81D5B0","#BAE8C9")

ggplot(varImp_dataframe,aes(x = reorder(Gene,-importance),y = importance,fill = Gene)) +

geom_col() +

ggtitle("Hub Genes")+

theme(panel.border = element_blank(),

axis.text.x = element_text(size = 8, colour = "black"),

axis.text.y = element_text(size = 12, colour = "black"),

axis.title.x = element_text(margin = margin(t=0,r=20,b=0,l = 0)),

plot.title = element_text(margin = margin(b=20)),

panel.grid.major = element_line(color = "grey",size = 0.22)) +

xlab("Gene")+ ylab("Importance")+

scale_fill_manual(values = mycolor)

#查看重要性前10的基因

top_10_vars <- svm_rfe_ranking$var[1:15]

top_10_vars

#提取前10变量的表达矩阵

top_svm_data <- mydata[,top_10_vars]

#提取最优子集中的变量

x_plot = svm_rfe$results$Variables

y_plot = svm_rfe$results$RMSE

plot(x_plot,y_plot,

xlab="Variable Number",

ylab="RMSE(Cross-Validation",

col="#A136A1",

pch=16,

cex=1.5,

lwd=2,

type="b",

ylim=c(0.2,0.6))#y轴的范围

lines(x_plot,y_plot,col="#DF294C",lwd=2) #格外绘制一条红色粗线

abline(h=min(y_plot),col="skyblue")#添加水平线

grid(col="grey",lwd = 1,lty=3)#添加网格线

legend("topright",c("Training RMSE","Cross-Validation RMSE"),

col = c("#A136A1","#DF294C"),pch = c(16,NA),lwd = 1,bg="white")#添加图例

#找到RMSE最小的点

#RMSE是Root Mean Square Error（均方根误差）的缩写，是评价回归模型的一个重要指标

#RMSE通过测量预测值与实际值的离差来评价模型的准确性，值越小表示模型约准确。

wmin <-which.min(svm_rfe$results$RMSE)

wmin

#在图上标记RMSE最小的点

points(wmin,svm_rfe$results$RMSE[wmin],col="orange",pch= 16,cex =1)

text(wmin,svm_rfe$results$RMSE[wmin],

paste0("N=",wmin),pos = 1,col = "orange",cex = 1)#cex是字的大小，1-3比较合适

#提取最优子集变量的名称

Target_Genes <- svm_rfe$optVariables

Target_Genes

#提取最优子集的表达矩阵

Best_SVM_data <- mydata[,Target_Genes]

#支持向量机拟合模型--------最优的表达矩阵与GROUP模型状态组合在一起

View(Best_SVM_data)

data<- cbind(mydata$Group,Best_SVM_data)

colnames(data)[1]<-"Group"

View(data)

#将数据集分成训练集和测试集（适用于样本量较大的情况）

set.seed(12345)

train_index <- sample(1:nrow(data),nrow(data)*0.7)#将数据集分为7和3，7为训练集

train_data<- data[train_index,]

test_data<-data[-train_index,]

#拟合模型

model_linear<-svm(Group~.,data = train_data,kernel="linear",probability=TRUE)

#查看模型预测准确率

#模型准确辜的计算 FOrmula 为:

# Accuracy = (TP + IN) / (TP + FP + FN + TN)

#TP(True Positive):真正例，模型预测为正例，实际也是正例

#TN(True Negative):真负例模型预测为负例实际也是负例

#FP(False positive): 假正例，模型预测为正例,实际是负例

#FN(False Neaative):假负例模型预测为负例.实际是正例

mean(train_data[,1] == model_linear$fitted)

#查看混淆矩阵

table(actual = train_data[,1],model_linear$fitted)

#获取模型预测概率

prob_linear <- predict(model_linear,train_data,probability = TRUE)

prob_linear_use <- attr(prob_linear,"probabilities")

linear_ROC<- roc(response = train_data$MI,predictor=prob_linear_use[,2])

#plot函数绘制ROC曲线

plot(linear_ROC,

legacy,axes = TRUE,

main="ROC curve",

type= "l",col="red",lty=1,

print.auc = T,

thresholds = "best",#基于youden指数选择roc曲线最佳阈值点

print.thres = "best")#在ROC曲线是哪个显示最佳阈值点

#拟合四种不同核函数的SVM模型

summary(data)

model_linear<-svm(Group~.,data = train_data,kernel="linear",probability=TRUE)

model_ploynomial <- svm(Group~., data = train_data,kernel="ploynomial",probability=TRUE)

model_radial<-svm(Group~.,data = train_data,kernel="radial",probability=TRUE)

model_sigmoid<-svm(Group~.,data = train_data,kernel="sigmoid",probability=TRUE)

mean(train_data[,1] == model_linear$fitted)

mean(train_data[,1] == model_ploynomial$fitted)

mean(train_data[,1] == model_radial$fitted)

mean(train_data[,1] == model_sigmoid$fitted) rm(list=ls())

setwd("C:/Users/22593/Desktop/常用R代码")

library(xgboost)

library(tidyverse)

library(skimr)

library(DataExplorer)

library(caret)

library(pROC)

boston <- read.csv(file.choose())

boston <- boston[,-1]

skim(boston)

boston$Group <- factor(boston$Group)

skim(boston)

hist(boston$Group,)

set.seed(42)

trains <- createDataPartition(

y = boston$Group,

p = 0.8,

list = F)

trainset<- boston[trains,]

testset <- boston[-trains,]

library(Matrix)

###c(x:x)代表你的因变量从第几列到第几列Group是自变量，不是因变量

traindata1 <- data.matrix(trainset[,c(2:45)])

traindata2<-Matrix(traindata1,sparse = T)

train_y <- as.numeric(trainset[,1])-1

traindata<- list(data=traindata2,label=train_y)

dtrain <- xgb.DMatrix(data = traindata$data,label = traindata$label)

testset1 <- data.matrix(testset[,c(2:45)])

testset2<-Matrix(testset1,sparse = T)

test_y <- as.numeric(testset[,1])-1

testset<- list(data=testset2,label=test_y)

dtest <- xgb.DMatrix(data = testset$data,label = testset$label)

model_xgb <- xgboost(data=dtrain,booster="gbtree",max_depth=6,eta=0.3,objective="multi:softmax",num_class = 2,nround = 200)

pre<- predict(model_xgb,newdata = dtest)

library(caret)

xgb.cf<-caret::confusionMatrix(as.factor(pre),as.factor(test_y))

xgb.cf

importance_matrix <- xgb.importance(model = model_xgb)

print(importance_matrix)

xgb.plot.importance(importance_matrix = importance_matrix,measure = "Cover")

set.seed(200)

trains1 <- createDataPartition(

y = boston$Group,

p = 0.8,

list = F

)

##从trains中分为两部分，一部分做训练，一部分做提前终止

trains2 <- sample(trains1,24)

valids1 <- setdiff(trains1,trains2)

data_trian <- boston[trains2, ]

data_valid <- boston[valids1, ]

data_test <- boston[-trains1,]

colnames(boston)

dvfunc <- dummyVars(~.,data = data_trian[, 2:45],fullRank = T)

data_trianx <- predict(dvfunc, newdata = data_trian[, 2:45])

data_triany <- ifelse(data_trian$Group == "No",0, 1)

xgb.plot.shap(data = data_trianx,

model = model_xgb,

top_n = 5)
