# Supplementary material for: Protein interactions, network pharmacology, and machine learning work together to predict genes linked to mitochondrial dysfunction in hypertrophic cardiomyopathy
Source: Research Square preprint supplement (doi:10.21203/rs.3.rs-5122992/v1), 2025-03-24
Supplement: Supplementary file 2 [file 74e7453d398a3c29363144a7.xlsx]

## Sheet: Sheet1
Target gene		Sequences	Target gene		Sequences
Mouse GAPDH	Forward	5’-AAGAAGGTGGTGAAGCAGGCAT-3’	Mouse CEBPD	Forward	5’- CGACTTCAGCGCCTACATTGA-3’
	Reverse	5’-CGGCATCGAAGGTGGAAGAGTG-3’		Reverse	5’- CTAGCGACAGACCCCACAC -3’
Mouse ANP	Forward	5’-CCTAAGCCCTTGTGGTGTGT-3’	Mouse β-MHC	Forward	5’- ATCAATGCAACCCTGGAGAC -3’
	Reverse	5’-CAGAGTGGGAGAGGCAAGAC-3’		Reverse	5’-CGAACATGTGGTGGTTGAAG-3’
