# Supplementary material for: Protein interactions, network pharmacology, and machine learning work together to predict genes linked to mitochondrial dysfunction in hypertrophic cardiomyopathy
Source: Research Square preprint supplement (doi:10.21203/rs.3.rs-5122992/v1), 2025-03-24
Supplement: Supplementary file 3 [file abed325a400254aded619bf0.xlsx]

## Sheet: Mitochondrial Disfunction
Gene	Description	Category	Uniprot ID	Gifts	GC Id	Relevance score	GeneCards Link
POLG	DNA Polymerase Gamma, Catalytic Subunit	Protein Coding	P54098	56	GC15M148631	143.422	https://www.genecards.org/cgi-bin/carddisp.pl?gene=POLG
SDHA	Succinate Dehydrogenase Complex Flavoprotein Subunit A	Protein Coding	P31040	57	GC05P000229	135.744	https://www.genecards.org/cgi-bin/carddisp.pl?gene=SDHA
POLGARF	POLG Alternative Reading Frame	Protein Coding	A0A3B3IS91	17	GC15M151439	113.609	https://www.genecards.org/cgi-bin/carddisp.pl?gene=POLGARF
MT-ATP6	Mitochondrially Encoded ATP Synthase Membrane Subunit 6	Protein Coding	P00846	41	GCMTP008531	100.895	https://www.genecards.org/cgi-bin/carddisp.pl?gene=MT-ATP6
MT-ND1	Mitochondrially Encoded NADH:Ubiquinone Oxidoreductase Core Subunit 1	Protein Coding	P03886	40	GCMTP003309	97.8203	https://www.genecards.org/cgi-bin/carddisp.pl?gene=MT-ND1
MT-ND5	Mitochondrially Encoded NADH:Ubiquinone Oxidoreductase Core Subunit 5	Protein Coding	P03915	41	GCMTP012339	94.5323	https://www.genecards.org/cgi-bin/carddisp.pl?gene=MT-ND5
MT-CO1	Mitochondrially Encoded Cytochrome C Oxidase I	Protein Coding	P00395	41	GCMTP005906	93.7373	https://www.genecards.org/cgi-bin/carddisp.pl?gene=MT-CO1
HADHA	Hydroxyacyl-CoA Dehydrogenase Trifunctional Multienzyme Complex Subunit Alpha	Protein Coding	P40939	55	GC02M026190	88.4703	https://www.genecards.org/cgi-bin/carddisp.pl?gene=HADHA
MT-ND2	Mitochondrially Encoded NADH:Ubiquinone Oxidoreductase Core Subunit 2	Protein Coding	P03891	42	GCMTP004472	85.5939	https://www.genecards.org/cgi-bin/carddisp.pl?gene=MT-ND2
MT-ND4	Mitochondrially Encoded NADH:Ubiquinone Oxidoreductase Core Subunit 4	Protein Coding	P03905	40	GCMTP010762	84.937	https://www.genecards.org/cgi-bin/carddisp.pl?gene=MT-ND4
MT-CYB	Mitochondrially Encoded Cytochrome B	Protein Coding	P00156	40	GCMTP014749	83.1559	https://www.genecards.org/cgi-bin/carddisp.pl?gene=MT-CYB
SURF1	SURF1 Cytochrome C Oxidase Assembly Factor	Protein Coding	Q15526	50	GC09M133351	82.9643	https://www.genecards.org/cgi-bin/carddisp.pl?gene=SURF1
SLC25A4	Solute Carrier Family 25 Member 4	Protein Coding	P12235	58	GC04P185143	81.5769	https://www.genecards.org/cgi-bin/carddisp.pl?gene=SLC25A4
MT-CO3	Mitochondrially Encoded Cytochrome C Oxidase III	Protein Coding	P00414	39	GCMTP009209	81.1338	https://www.genecards.org/cgi-bin/carddisp.pl?gene=MT-CO3
MT-CO2	Mitochondrially Encoded Cytochrome C Oxidase II	Protein Coding	P00403	42	GCMTP007587	80.6841	https://www.genecards.org/cgi-bin/carddisp.pl?gene=MT-CO2
MPV17	Mitochondrial Inner Membrane Protein MPV17	Protein Coding	P39210	50	GC02M027309	80.0441	https://www.genecards.org/cgi-bin/carddisp.pl?gene=MPV17
SCO2	Synthesis Of Cytochrome C Oxidase 2	Protein Coding	O43819	53	GC22M050523	77.9726	https://www.genecards.org/cgi-bin/carddisp.pl?gene=SCO2
MT-TL1	Mitochondrially Encoded TRNA-Leu (UUA/G) 1	RNA Gene		23	GCMTP003232	77.6436	https://www.genecards.org/cgi-bin/carddisp.pl?gene=MT-TL1
NDUFS1	NADH:Ubiquinone Oxidoreductase Core Subunit S1	Protein Coding	P28331	52	GC02M206114	76.3786	https://www.genecards.org/cgi-bin/carddisp.pl?gene=NDUFS1
TYMP	Thymidine Phosphorylase	Protein Coding	P19971	56	GC22M050525	76.1211	https://www.genecards.org/cgi-bin/carddisp.pl?gene=TYMP
TWNK	Twinkle MtDNA Helicase	Protein Coding	Q96RR1	50	GC10P109747	75.1929	https://www.genecards.org/cgi-bin/carddisp.pl?gene=TWNK
SUCLA2	Succinate-CoA Ligase ADP-Forming Subunit Beta	Protein Coding	Q9P2R7	54	GC13M047745	75.1584	https://www.genecards.org/cgi-bin/carddisp.pl?gene=SUCLA2
MT-ND3	Mitochondrially Encoded NADH:Ubiquinone Oxidoreductase Core Subunit 3	Protein Coding	P03897	41	GCMTP010061	74.5593	https://www.genecards.org/cgi-bin/carddisp.pl?gene=MT-ND3
TFAM	Transcription Factor A, Mitochondrial	Protein Coding	Q00059	54	GC10P058385	74.0267	https://www.genecards.org/cgi-bin/carddisp.pl?gene=TFAM
MT-ND6	Mitochondrially Encoded NADH:Ubiquinone Oxidoreductase Core Subunit 6	Protein Coding	P03923	40	GCMTM014151	73.7387	https://www.genecards.org/cgi-bin/carddisp.pl?gene=MT-ND6
BCS1L	BCS1 Homolog, Ubiquinol-Cytochrome C Reductase Complex Chaperone	Protein Coding	Q9Y276	54	GC02P218658	73.1549	https://www.genecards.org/cgi-bin/carddisp.pl?gene=BCS1L
NDUFV1	NADH:Ubiquinone Oxidoreductase Core Subunit V1	Protein Coding	P49821	53	GC11P089259	73.0165	https://www.genecards.org/cgi-bin/carddisp.pl?gene=NDUFV1
TMEM70	Transmembrane Protein 70	Protein Coding	Q9BUB7	48	GC08P073972	72.9041	https://www.genecards.org/cgi-bin/carddisp.pl?gene=TMEM70
NDUFS4	NADH:Ubiquinone Oxidoreductase Subunit S4	Protein Coding	O43181	51	GC05P053560	70.8905	https://www.genecards.org/cgi-bin/carddisp.pl?gene=NDUFS4
COX10	Cytochrome C Oxidase Assembly Factor Heme A:Farnesyltransferase COX10	Protein Coding	Q12887	52	GC17P014069	70.8388	https://www.genecards.org/cgi-bin/carddisp.pl?gene=COX10
MT-ATP8	Mitochondrially Encoded ATP Synthase Membrane Subunit 8	Protein Coding	P03928	38	GCMTP008368	69.261	https://www.genecards.org/cgi-bin/carddisp.pl?gene=MT-ATP8
HADHB	Hydroxyacyl-CoA Dehydrogenase Trifunctional Multienzyme Complex Subunit Beta	Protein Coding	P55084	54	GC02P026243	68.7631	https://www.genecards.org/cgi-bin/carddisp.pl?gene=HADHB
RRM2B	Ribonucleotide Reductase Regulatory TP53 Inducible Subunit M2B	Protein Coding	Q7LG56	57	GC08M102204	68.7132	https://www.genecards.org/cgi-bin/carddisp.pl?gene=RRM2B
CHCHD10	Coiled-Coil-Helix-Coiled-Coil-Helix Domain Containing 10	Protein Coding	Q8WYQ3	48	GC22M023765	68.3952	https://www.genecards.org/cgi-bin/carddisp.pl?gene=CHCHD10
LRPPRC	Leucine Rich Pentatricopeptide Repeat Containing	Protein Coding	P42704	51	GC02M043886	68.2856	https://www.genecards.org/cgi-bin/carddisp.pl?gene=LRPPRC
MT-TS1	Mitochondrially Encoded TRNA-Ser (UCN) 1	RNA Gene		21	GCMTM007447	68.2129	https://www.genecards.org/cgi-bin/carddisp.pl?gene=MT-TS1
TK2	Thymidine Kinase 2	Protein Coding	O00142	51	GC16M066508	68.1867	https://www.genecards.org/cgi-bin/carddisp.pl?gene=TK2
MTO1	Mitochondrial TRNA Translation Optimization 1	Protein Coding	Q9Y2Z2	50	GC06P073461	67.076	https://www.genecards.org/cgi-bin/carddisp.pl?gene=MTO1
DGUOK	Deoxyguanosine Kinase	Protein Coding	Q16854	52	GC02P073926	66.1448	https://www.genecards.org/cgi-bin/carddisp.pl?gene=DGUOK
DNM1L	Dynamin 1 Like	Protein Coding	O00429	57	GC12P032679	66.1373	https://www.genecards.org/cgi-bin/carddisp.pl?gene=DNM1L
FBXL4	F-Box And Leucine Rich Repeat Protein 4	Protein Coding	Q9UKA2	47	GC06M098868	65.7884	https://www.genecards.org/cgi-bin/carddisp.pl?gene=FBXL4
MT-TK	Mitochondrially Encoded TRNA-Lys (AAA/G)	RNA Gene		19	GCMTP008297	65.144	https://www.genecards.org/cgi-bin/carddisp.pl?gene=MT-TK
NUBPL	NUBP Iron-Sulfur Cluster Assembly Factor, Mitochondrial	Protein Coding	Q8TB37	48	GC14P031489	63.9916	https://www.genecards.org/cgi-bin/carddisp.pl?gene=NUBPL
ACAD9	Acyl-CoA Dehydrogenase Family Member 9	Protein Coding	Q9H845	52	GC03P139001	63.8118	https://www.genecards.org/cgi-bin/carddisp.pl?gene=ACAD9
NDUFAF5	NADH:Ubiquinone Oxidoreductase Complex Assembly Factor 5	Protein Coding	Q5TEU4	45	GC20P014005	61.9527	https://www.genecards.org/cgi-bin/carddisp.pl?gene=NDUFAF5
NDUFS2	NADH:Ubiquinone Oxidoreductase Core Subunit S2	Protein Coding	O75306	52	GC01P161197	61.6776	https://www.genecards.org/cgi-bin/carddisp.pl?gene=NDUFS2
NDUFA10	NADH:Ubiquinone Oxidoreductase Subunit A10	Protein Coding	O95299	51	GC02M239893	61.502	https://www.genecards.org/cgi-bin/carddisp.pl?gene=NDUFA10
FASTKD2	FAST Kinase Domains 2	Protein Coding	Q9NYY8	47	GC02P206770	60.3023	https://www.genecards.org/cgi-bin/carddisp.pl?gene=FASTKD2
TTC19	Tetratricopeptide Repeat Domain 19	Protein Coding	Q6DKK2	47	GC17P015999	59.7127	https://www.genecards.org/cgi-bin/carddisp.pl?gene=TTC19
MT-RNR1	Mitochondrially Encoded 12S RRNA	RNA Gene	A0A0C5B5G6	21	GCMTP000642	58.2244	https://www.genecards.org/cgi-bin/carddisp.pl?gene=MT-RNR1
NDUFS7	NADH:Ubiquinone Oxidoreductase Core Subunit S7	Protein Coding	O75251	54	GC19P111868	57.2698	https://www.genecards.org/cgi-bin/carddisp.pl?gene=NDUFS7
FOXRED1	FAD Dependent Oxidoreductase Domain Containing 1	Protein Coding	Q96CU9	48	GC11P126269	57.1884	https://www.genecards.org/cgi-bin/carddisp.pl?gene=FOXRED1
NDUFS3	NADH:Ubiquinone Oxidoreductase Core Subunit S3	Protein Coding	O75489	54	GC11P047791	57.1495	https://www.genecards.org/cgi-bin/carddisp.pl?gene=NDUFS3
COX5A	Cytochrome C Oxidase Subunit 5A	Protein Coding	P20674	53	GC15M074919	57.1069	https://www.genecards.org/cgi-bin/carddisp.pl?gene=COX5A
POLG2	DNA Polymerase Gamma 2, Accessory Subunit	Protein Coding	Q9UHN1	50	GC17M064477	57.054	https://www.genecards.org/cgi-bin/carddisp.pl?gene=POLG2
MT-ND4L	Mitochondrially Encoded NADH:Ubiquinone Oxidoreductase Core Subunit 4L	Protein Coding	P03901	35	GCMTP010472	56.9984	https://www.genecards.org/cgi-bin/carddisp.pl?gene=MT-ND4L
SDHD	Succinate Dehydrogenase Complex Subunit D	Protein Coding	O14521	53	GC11P112505	56.8258	https://www.genecards.org/cgi-bin/carddisp.pl?gene=SDHD
SCO1	Synthesis Of Cytochrome C Oxidase 1	Protein Coding	O75880	53	GC17M010672	56.733	https://www.genecards.org/cgi-bin/carddisp.pl?gene=SCO1
OPA1	OPA1 Mitochondrial Dynamin Like GTPase	Protein Coding	O60313	53	GC03P193594	56.6904	https://www.genecards.org/cgi-bin/carddisp.pl?gene=OPA1
COX15	Cytochrome C Oxidase Assembly Homolog COX15	Protein Coding	Q7KZN9	50	GC10M099696	56.5727	https://www.genecards.org/cgi-bin/carddisp.pl?gene=COX15
MT-TI	Mitochondrially Encoded TRNA-Ile (AUU/C)	RNA Gene		19	GCMTP004265	56.114	https://www.genecards.org/cgi-bin/carddisp.pl?gene=MT-TI
ATP5F1A	ATP Synthase F1 Subunit Alpha	Protein Coding	P25705	54	GC18M046081	56.0184	https://www.genecards.org/cgi-bin/carddisp.pl?gene=ATP5F1A
MT-TW	Mitochondrially Encoded TRNA-Trp (UGA/G)	RNA Gene		19	GCMTP005514	55.5185	https://www.genecards.org/cgi-bin/carddisp.pl?gene=MT-TW
NDUFS8	NADH:Ubiquinone Oxidoreductase Core Subunit S8	Protein Coding	O00217	52	GC11P068030	55.5099	https://www.genecards.org/cgi-bin/carddisp.pl?gene=NDUFS8
NDUFAF1	NADH:Ubiquinone Oxidoreductase Complex Assembly Factor 1	Protein Coding	Q9Y375	50	GC15M041387	55.4766	https://www.genecards.org/cgi-bin/carddisp.pl?gene=NDUFAF1
TIMMDC1	Translocase Of Inner Mitochondrial Membrane Domain Containing 1	Protein Coding	Q9NPL8	46	GC03P119498	54.7432	https://www.genecards.org/cgi-bin/carddisp.pl?gene=TIMMDC1
MT-TH	Mitochondrially Encoded TRNA-His (CAU/C)	RNA Gene		19	GCMTP012140	54.1932	https://www.genecards.org/cgi-bin/carddisp.pl?gene=MT-TH
MT-TS2	Mitochondrially Encoded TRNA-Ser (AGU/C) 2	RNA Gene		19	GCMTP012215	53.5949	https://www.genecards.org/cgi-bin/carddisp.pl?gene=MT-TS2
NDUFAF2	NADH:Ubiquinone Oxidoreductase Complex Assembly Factor 2	Protein Coding	Q8N183	49	GC05P060945	53.5126	https://www.genecards.org/cgi-bin/carddisp.pl?gene=NDUFAF2
NDUFV2	NADH:Ubiquinone Oxidoreductase Core Subunit V2	Protein Coding	P19404	52	GC18P009106	53.2782	https://www.genecards.org/cgi-bin/carddisp.pl?gene=NDUFV2
SUCLG1	Succinate-CoA Ligase GDP/ADP-Forming Subunit Alpha	Protein Coding	P53597	53	GC02M084423	52.338	https://www.genecards.org/cgi-bin/carddisp.pl?gene=SUCLG1
SDHB	Succinate Dehydrogenase Complex Iron Sulfur Subunit B	Protein Coding	P21912	57	GC01M019222	52.1595	https://www.genecards.org/cgi-bin/carddisp.pl?gene=SDHB
NDUFS6	NADH:Ubiquinone Oxidoreductase Subunit S6	Protein Coding	O75380	51	GC05P001801	51.7885	https://www.genecards.org/cgi-bin/carddisp.pl?gene=NDUFS6
MT-TN	Mitochondrially Encoded TRNA-Asn (AAU/C)	RNA Gene		19	GCMTM005659	51.3472	https://www.genecards.org/cgi-bin/carddisp.pl?gene=MT-TN
TRMU	TRNA Mitochondrial 2-Thiouridylase	Protein Coding	O75648	47	GC22P046330	50.9894	https://www.genecards.org/cgi-bin/carddisp.pl?gene=TRMU
AIFM1	Apoptosis Inducing Factor Mitochondria Associated 1	Protein Coding	O95831	59	GC0XM130129	50.0479	https://www.genecards.org/cgi-bin/carddisp.pl?gene=AIFM1
NDUFAF4	NADH:Ubiquinone Oxidoreductase Complex Assembly Factor 4	Protein Coding	Q9P032	50	GC06M096889	49.7936	https://www.genecards.org/cgi-bin/carddisp.pl?gene=NDUFAF4
GAREM2	GRB2 Associated Regulator Of MAPK1 Subtype 2	Protein Coding	Q75VX8	38	GC02P026529	49.317	https://www.genecards.org/cgi-bin/carddisp.pl?gene=GAREM2
ATPAF2	ATP Synthase Mitochondrial F1 Complex Assembly Factor 2	Protein Coding	Q8N5M1	47	GC17M017977	49.2504	https://www.genecards.org/cgi-bin/carddisp.pl?gene=ATPAF2
COX4I1	Cytochrome C Oxidase Subunit 4I1	Protein Coding	P13073	53	GC16P085798	49.2404	https://www.genecards.org/cgi-bin/carddisp.pl?gene=COX4I1
MT-TM	Mitochondrially Encoded TRNA-Met (AUA/G)	RNA Gene		19	GCMTP004404	49.1408	https://www.genecards.org/cgi-bin/carddisp.pl?gene=MT-TM
TMEM126B	Transmembrane Protein 126B	Protein Coding	Q8IUX1	46	GC11P085628	48.8902	https://www.genecards.org/cgi-bin/carddisp.pl?gene=TMEM126B
MT-TE	Mitochondrially Encoded TRNA-Glu (GAA/G)	RNA Gene		18	GCMTM014676	48.7573	https://www.genecards.org/cgi-bin/carddisp.pl?gene=MT-TE
MT-TA	Mitochondrially Encoded TRNA-Ala (GCN)	RNA Gene		17	GCMTM005589	48.4594	https://www.genecards.org/cgi-bin/carddisp.pl?gene=MT-TA
MT-TQ	Mitochondrially Encoded TRNA-Gln (CAA/G)	RNA Gene		19	GCMTM004331	48.4268	https://www.genecards.org/cgi-bin/carddisp.pl?gene=MT-TQ
MTFMT	Mitochondrial Methionyl-TRNA Formyltransferase	Protein Coding	Q96DP5	48	GC15M065001	48.274	https://www.genecards.org/cgi-bin/carddisp.pl?gene=MTFMT
IBA57	Iron-Sulfur Cluster Assembly Factor IBA57	Protein Coding	Q5T440	46	GC01P228165	48.2324	https://www.genecards.org/cgi-bin/carddisp.pl?gene=IBA57
TSFM	Ts Translation Elongation Factor, Mitochondrial	Protein Coding	P43897	51	GC12P057782	48.0602	https://www.genecards.org/cgi-bin/carddisp.pl?gene=TSFM
TACO1	Translational Activator Of Cytochrome C Oxidase I	Protein Coding	Q9BSH4	48	GC17P063600	47.9537	https://www.genecards.org/cgi-bin/carddisp.pl?gene=TACO1
MGME1	Mitochondrial Genome Maintenance Exonuclease 1	Protein Coding	Q9BQP7	45	GC20P017968	47.3223	https://www.genecards.org/cgi-bin/carddisp.pl?gene=MGME1
MT-TR	Mitochondrially Encoded TRNA-Arg (CGN)	RNA Gene		18	GCMTP010407	47.2842	https://www.genecards.org/cgi-bin/carddisp.pl?gene=MT-TR
NDUFAF6	NADH:Ubiquinone Oxidoreductase Complex Assembly Factor 6	Protein Coding	Q330K2	44	GC08P094895	46.9597	https://www.genecards.org/cgi-bin/carddisp.pl?gene=NDUFAF6
UQCRC2	Ubiquinol-Cytochrome C Reductase Core Protein 2	Protein Coding	P22695	53	GC16P081067	46.6631	https://www.genecards.org/cgi-bin/carddisp.pl?gene=UQCRC2
MT-TV	Mitochondrially Encoded TRNA-Val (GUN)	RNA Gene		20	GCMTP001605	46.6089	https://www.genecards.org/cgi-bin/carddisp.pl?gene=MT-TV
NDUFAF3	NADH:Ubiquinone Oxidoreductase Complex Assembly Factor 3	Protein Coding	Q9BU61	47	GC03P049020	46.5797	https://www.genecards.org/cgi-bin/carddisp.pl?gene=NDUFAF3
NDUFA11	NADH:Ubiquinone Oxidoreductase Subunit A11	Protein Coding	Q86Y39	46	GC19M005891	46.402	https://www.genecards.org/cgi-bin/carddisp.pl?gene=NDUFA11
MT-TL2	Mitochondrially Encoded TRNA-Leu (CUN) 2	RNA Gene		19	GCMTP012268	46.0856	https://www.genecards.org/cgi-bin/carddisp.pl?gene=MT-TL2
UQCRQ	Ubiquinol-Cytochrome C Reductase Complex III Subunit VII	Protein Coding	O14949	48	GC05P132866	45.7877	https://www.genecards.org/cgi-bin/carddisp.pl?gene=UQCRQ
LARS2	Leucyl-TRNA Synthetase 2, Mitochondrial	Protein Coding	Q15031	53	GC03P057374	45.6872	https://www.genecards.org/cgi-bin/carddisp.pl?gene=LARS2
STAT3	Signal Transducer And Activator Of Transcription 3	Protein Coding	P40763	62	GC17M042313	45.6142	https://www.genecards.org/cgi-bin/carddisp.pl?gene=STAT3
MT-TG	Mitochondrially Encoded TRNA-Gly (GGN)	RNA Gene		18	GCMTP009993	45.5814	https://www.genecards.org/cgi-bin/carddisp.pl?gene=MT-TG
COX20	Cytochrome C Oxidase Assembly Factor COX20	Protein Coding	Q5RI15	50	GC01P244848	45.0422	https://www.genecards.org/cgi-bin/carddisp.pl?gene=COX20
LYRM7	LYR Motif Containing 7	Protein Coding	Q5U5X0	46	GC05P131170	45.0389	https://www.genecards.org/cgi-bin/carddisp.pl?gene=LYRM7
COX6B1	Cytochrome C Oxidase Subunit 6B1	Protein Coding	P14854	51	GC19P112936	44.8328	https://www.genecards.org/cgi-bin/carddisp.pl?gene=COX6B1
MT-TD	Mitochondrially Encoded TRNA-Asp (GAU/C)	RNA Gene		19	GCMTP007520	44.3662	https://www.genecards.org/cgi-bin/carddisp.pl?gene=MT-TD
GFM2	GTP Dependent Ribosome Recycling Factor Mitochondrial 2	Protein Coding	Q969S9	48	GC05M074721	44.3445	https://www.genecards.org/cgi-bin/carddisp.pl?gene=GFM2
NDUFA13	NADH:Ubiquinone Oxidoreductase Subunit A13	Protein Coding	Q9P0J0	52	GC19P019515	43.8556	https://www.genecards.org/cgi-bin/carddisp.pl?gene=NDUFA13
FDX2	Ferredoxin 2	Protein Coding	Q6P4F2	41	GC19M092062	43.7732	https://www.genecards.org/cgi-bin/carddisp.pl?gene=FDX2
ECHS1	Enoyl-CoA Hydratase, Short Chain 1	Protein Coding	P30084	54	GC10M133362	43.6666	https://www.genecards.org/cgi-bin/carddisp.pl?gene=ECHS1
MFF	Mitochondrial Fission Factor	Protein Coding	Q9GZY8	47	GC02P227325	43.4818	https://www.genecards.org/cgi-bin/carddisp.pl?gene=MFF
POLRMT	RNA Polymerase Mitochondrial	Protein Coding	O00411	49	GC19M000617	43.3677	https://www.genecards.org/cgi-bin/carddisp.pl?gene=POLRMT
ATP5F1E	ATP Synthase F1 Subunit Epsilon	Protein Coding	P56381	50	GC20M059026	43.2538	https://www.genecards.org/cgi-bin/carddisp.pl?gene=ATP5F1E
MFN2	Mitofusin 2	Protein Coding	O95140	57	GC01P011980	43.1841	https://www.genecards.org/cgi-bin/carddisp.pl?gene=MFN2
YARS2	Tyrosyl-TRNA Synthetase 2	Protein Coding	Q9Y2Z4	52	GC12M032873	43.1678	https://www.genecards.org/cgi-bin/carddisp.pl?gene=YARS2
NDUFA1	NADH:Ubiquinone Oxidoreductase Subunit A1	Protein Coding	O15239	51	GC0XP119871	43.1165	https://www.genecards.org/cgi-bin/carddisp.pl?gene=NDUFA1
TFB1M	Transcription Factor B1, Mitochondrial	Protein Coding	Q8WVM0	48	GC06M155247	43.0862	https://www.genecards.org/cgi-bin/carddisp.pl?gene=TFB1M
MT-TT	Mitochondrially Encoded TRNA-Thr (ACN)	RNA Gene		22	GCMTP015890	43.0717	https://www.genecards.org/cgi-bin/carddisp.pl?gene=MT-TT
CYCS	Cytochrome C, Somatic	Protein Coding	P99999	57	GC07M025118	43.0366	https://www.genecards.org/cgi-bin/carddisp.pl?gene=CYCS
NDUFB11	NADH:Ubiquinone Oxidoreductase Subunit B11	Protein Coding	Q9NX14	48	GC0XM047142	43.0186	https://www.genecards.org/cgi-bin/carddisp.pl?gene=NDUFB11
MSTO1	Misato Mitochondrial Distribution And Morphology Regulator 1	Protein Coding	Q9BUK6	46	GC01P164575	42.7406	https://www.genecards.org/cgi-bin/carddisp.pl?gene=MSTO1
SDHAF1	Succinate Dehydrogenase Complex Assembly Factor 1	Protein Coding	A6NFY7	43	GC19P035995	42.4592	https://www.genecards.org/cgi-bin/carddisp.pl?gene=SDHAF1
NARS2	Asparaginyl-TRNA Synthetase 2, Mitochondrial	Protein Coding	Q96I59	52	GC11M078435	42.4176	https://www.genecards.org/cgi-bin/carddisp.pl?gene=NARS2
MT-TF	Mitochondrially Encoded TRNA-Phe (UUU/C)	RNA Gene		19	GCMTP000580	42.2745	https://www.genecards.org/cgi-bin/carddisp.pl?gene=MT-TF
PMPCB	Peptidase, Mitochondrial Processing Subunit Beta	Protein Coding	O75439	51	GC07P103297	42.2277	https://www.genecards.org/cgi-bin/carddisp.pl?gene=PMPCB
GFM1	G Elongation Factor Mitochondrial 1	Protein Coding	Q96RP9	52	GC03P158644	42.1322	https://www.genecards.org/cgi-bin/carddisp.pl?gene=GFM1
NDUFA9	NADH:Ubiquinone Oxidoreductase Subunit A9	Protein Coding	Q16795	52	GC12P004649	42.0816	https://www.genecards.org/cgi-bin/carddisp.pl?gene=NDUFA9
COA3	Cytochrome C Oxidase Assembly Factor 3	Protein Coding	Q9Y2R0	41	GC17M042795	42.0663	https://www.genecards.org/cgi-bin/carddisp.pl?gene=COA3
NDUFB10	NADH:Ubiquinone Oxidoreductase Subunit B10	Protein Coding	O96000	51	GC16P080234	41.8155	https://www.genecards.org/cgi-bin/carddisp.pl?gene=NDUFB10
UQCRB	Ubiquinol-Cytochrome C Reductase Binding Protein	Protein Coding	P14927	51	GC08M096225	41.7999	https://www.genecards.org/cgi-bin/carddisp.pl?gene=UQCRB
MT-TC	Mitochondrially Encoded TRNA-Cys (UGU/C)	RNA Gene		18	GCMTM005763	41.6954	https://www.genecards.org/cgi-bin/carddisp.pl?gene=MT-TC
UQCC2	Ubiquinol-Cytochrome C Reductase Complex Assembly Factor 2	Protein Coding	Q9BRT2	46	GC06M033694	41.5764	https://www.genecards.org/cgi-bin/carddisp.pl?gene=UQCC2
PET100	PET100 Cytochrome C Oxidase Chaperone	Protein Coding	P0DJ07	38	GC19P112135	41.547	https://www.genecards.org/cgi-bin/carddisp.pl?gene=PET100
COX8A	Cytochrome C Oxidase Subunit 8A	Protein Coding	P10176	48	GC11P088929	41.4874	https://www.genecards.org/cgi-bin/carddisp.pl?gene=COX8A
NFU1	NFU1 Iron-Sulfur Cluster Scaffold	Protein Coding	Q9UMS0	51	GC02M069395	41.4147	https://www.genecards.org/cgi-bin/carddisp.pl?gene=NFU1
ISCA2	Iron-Sulfur Cluster Assembly 2	Protein Coding	Q86U28	48	GC14P074493	40.9801	https://www.genecards.org/cgi-bin/carddisp.pl?gene=ISCA2
BOLA3	BolA Family Member 3	Protein Coding	Q53S33	47	GC02M074136	40.8711	https://www.genecards.org/cgi-bin/carddisp.pl?gene=BOLA3
LOC130067862	ATAC-STARR-Seq Lymphoblastoid Silent Region 13986	Functional Element		7	GC22P074698	40.8699	https://www.genecards.org/cgi-bin/carddisp.pl?gene=LOC130067862
PRKN	Parkin RBR E3 Ubiquitin Protein Ligase	Protein Coding	O60260	58	GC06M161348	40.4283	https://www.genecards.org/cgi-bin/carddisp.pl?gene=PRKN
COA8	Cytochrome C Oxidase Assembly Factor 8	Protein Coding	Q96IL0	40	GC14P115881	40.3699	https://www.genecards.org/cgi-bin/carddisp.pl?gene=COA8
WARS2	Tryptophanyl TRNA Synthetase 2, Mitochondrial	Protein Coding	Q9UGM6	52	GC01M119031	40.2879	https://www.genecards.org/cgi-bin/carddisp.pl?gene=WARS2
NDUFB3	NADH:Ubiquinone Oxidoreductase Subunit B3	Protein Coding	O43676	49	GC02P201071	40.2214	https://www.genecards.org/cgi-bin/carddisp.pl?gene=NDUFB3
HSD17B10	Hydroxysteroid 17-Beta Dehydrogenase 10	Protein Coding	Q99714	55	GC0XM053431	40.1826	https://www.genecards.org/cgi-bin/carddisp.pl?gene=HSD17B10
NDUFA2	NADH:Ubiquinone Oxidoreductase Subunit A2	Protein Coding	O43678	49	GC05M140793	40.1046	https://www.genecards.org/cgi-bin/carddisp.pl?gene=NDUFA2
FARS2	Phenylalanyl-TRNA Synthetase 2, Mitochondrial	Protein Coding	O95363	52	GC06P006606	39.9614	https://www.genecards.org/cgi-bin/carddisp.pl?gene=FARS2
AARS2	Alanyl-TRNA Synthetase 2, Mitochondrial	Protein Coding	Q5JTZ9	51	GC06M094052	39.7868	https://www.genecards.org/cgi-bin/carddisp.pl?gene=AARS2
COX6A2	Cytochrome C Oxidase Subunit 6A2	Protein Coding	Q02221	45	GC16M044172	39.7239	https://www.genecards.org/cgi-bin/carddisp.pl?gene=COX6A2
LONP1	Lon Peptidase 1, Mitochondrial	Protein Coding	P36776	54	GC19M005691	39.7167	https://www.genecards.org/cgi-bin/carddisp.pl?gene=LONP1
NDUFB9	NADH:Ubiquinone Oxidoreductase Subunit B9	Protein Coding	Q9Y6M9	52	GC08P124539	39.6243	https://www.genecards.org/cgi-bin/carddisp.pl?gene=NDUFB9
MECR	Mitochondrial Trans-2-Enoyl-CoA Reductase	Protein Coding	Q9BV79	51	GC01M029167	39.4215	https://www.genecards.org/cgi-bin/carddisp.pl?gene=MECR
TP53	Tumor Protein P53	Protein Coding	P04637	62	GC17M007661	39.2788	https://www.genecards.org/cgi-bin/carddisp.pl?gene=TP53
SPG7	SPG7 Matrix AAA Peptidase Subunit, Paraplegin	Protein Coding	Q9UQ90	52	GC16P095411	39.264	https://www.genecards.org/cgi-bin/carddisp.pl?gene=SPG7
IARS2	Isoleucyl-TRNA Synthetase 2, Mitochondrial	Protein Coding	Q9NSE4	50	GC01P220094	39.1102	https://www.genecards.org/cgi-bin/carddisp.pl?gene=IARS2
MT-TY	Mitochondrially Encoded TRNA-Tyr (UAU/C)	RNA Gene		18	GCMTM005828	38.9277	https://www.genecards.org/cgi-bin/carddisp.pl?gene=MT-TY
NDUFA12	NADH:Ubiquinone Oxidoreductase Subunit A12	Protein Coding	Q9UI09	52	GC12M094898	38.7537	https://www.genecards.org/cgi-bin/carddisp.pl?gene=NDUFA12
EARS2	Glutamyl-TRNA Synthetase 2, Mitochondrial	Protein Coding	Q5JPH6	49	GC16M025405	38.6068	https://www.genecards.org/cgi-bin/carddisp.pl?gene=EARS2
PUS1	Pseudouridine Synthase 1	Protein Coding	Q9Y606	52	GC12P131929	38.5929	https://www.genecards.org/cgi-bin/carddisp.pl?gene=PUS1
UQCRFS1	Ubiquinol-Cytochrome C Reductase, Rieske Iron-Sulfur Polypeptide 1	Protein Coding	P47985	54	GC19M029205	38.529	https://www.genecards.org/cgi-bin/carddisp.pl?gene=UQCRFS1
MRPL39	Mitochondrial Ribosomal Protein L39	Protein Coding	Q9NYK5	45	GC21M025585	38.4151	https://www.genecards.org/cgi-bin/carddisp.pl?gene=MRPL39
MRPS34	Mitochondrial Ribosomal Protein S34	Protein Coding	P82930	45	GC16M001771	38.383	https://www.genecards.org/cgi-bin/carddisp.pl?gene=MRPS34
ATP5F1D	ATP Synthase F1 Subunit Delta	Protein Coding	P30049	47	GC19P111851	38.1405	https://www.genecards.org/cgi-bin/carddisp.pl?gene=ATP5F1D
FXN	Frataxin	Protein Coding	Q16595	55	GC09P069035	37.8528	https://www.genecards.org/cgi-bin/carddisp.pl?gene=FXN
DNA2	DNA Replication Helicase/Nuclease 2	Protein Coding	P51530	50	GC10M068414	37.6783	https://www.genecards.org/cgi-bin/carddisp.pl?gene=DNA2
NDUFA4	NDUFA4 Mitochondrial Complex Associated	Protein Coding	O00483	50	GC07M010938	37.6661	https://www.genecards.org/cgi-bin/carddisp.pl?gene=NDUFA4
NDUFAF8	NADH:Ubiquinone Oxidoreductase Complex Assembly Factor 8	Protein Coding	A1L188	39	GC17P113359	37.4709	https://www.genecards.org/cgi-bin/carddisp.pl?gene=NDUFAF8
LOC126861242	CDK7 Strongly-Dependent Group 2 Enhancer GRCh37_chr11:67379204-67380403	Functional Element		8	GC11P090733	37.4457	https://www.genecards.org/cgi-bin/carddisp.pl?gene=LOC126861242
NDUFA6	NADH:Ubiquinone Oxidoreductase Subunit A6	Protein Coding	P56556	51	GC22M042085	37.4221	https://www.genecards.org/cgi-bin/carddisp.pl?gene=NDUFA6
NCAPH2	Non-SMC Condensin II Complex Subunit H2	Protein Coding	Q6IBW4	46	GC22P050508	37.2315	https://www.genecards.org/cgi-bin/carddisp.pl?gene=NCAPH2
ATP5PO	ATP Synthase Peripheral Stalk Subunit OSCP	Protein Coding	P48047	51	GC21M033904	37.2067	https://www.genecards.org/cgi-bin/carddisp.pl?gene=ATP5PO
NDUFB8	NADH:Ubiquinone Oxidoreductase Subunit B8	Protein Coding	O95169	51	GC10M100523	36.9213	https://www.genecards.org/cgi-bin/carddisp.pl?gene=NDUFB8
MRPS22	Mitochondrial Ribosomal Protein S22	Protein Coding	P82650	50	GC03P139005	36.9182	https://www.genecards.org/cgi-bin/carddisp.pl?gene=MRPS22
PINK1	PTEN Induced Kinase 1	Protein Coding	Q9BXM7	55	GC01P041392	36.851	https://www.genecards.org/cgi-bin/carddisp.pl?gene=PINK1
MT-TP	Mitochondrially Encoded TRNA-Pro (CCN)	RNA Gene		15	GCMTM015957	36.7421	https://www.genecards.org/cgi-bin/carddisp.pl?gene=MT-TP
MRPL12	Mitochondrial Ribosomal Protein L12	Protein Coding	P52815	47	GC17P113383	36.6647	https://www.genecards.org/cgi-bin/carddisp.pl?gene=MRPL12
ISCA1	Iron-Sulfur Cluster Assembly 1	Protein Coding	Q9BUE6	47	GC09M086264	36.6561	https://www.genecards.org/cgi-bin/carddisp.pl?gene=ISCA1
TRMT10C	TRNA Methyltransferase 10C, Mitochondrial RNase P Subunit	Protein Coding	Q7L0Y3	45	GC03P101561	36.4802	https://www.genecards.org/cgi-bin/carddisp.pl?gene=TRMT10C
SLC25A10	Solute Carrier Family 25 Member 10	Protein Coding	Q9UBX3	49	GC17P081712	36.4051	https://www.genecards.org/cgi-bin/carddisp.pl?gene=SLC25A10
CYC1	Cytochrome C1	Protein Coding	P08574	52	GC08P144095	35.8607	https://www.genecards.org/cgi-bin/carddisp.pl?gene=CYC1
SLC25A3	Solute Carrier Family 25 Member 3	Protein Coding	Q00325	51	GC12P098593	35.286	https://www.genecards.org/cgi-bin/carddisp.pl?gene=SLC25A3
GTPBP3	GTP Binding Protein 3, Mitochondrial	Protein Coding	Q969Y2	48	GC19P112613	35.1539	https://www.genecards.org/cgi-bin/carddisp.pl?gene=GTPBP3
VARS2	Valyl-TRNA Synthetase 2, Mitochondrial	Protein Coding	Q5ST30	50	GC06P134804	35.0765	https://www.genecards.org/cgi-bin/carddisp.pl?gene=VARS2
MRPS16	Mitochondrial Ribosomal Protein S16	Protein Coding	Q9Y3D3	50	GC10M073248	34.9604	https://www.genecards.org/cgi-bin/carddisp.pl?gene=MRPS16
TFB2M	Transcription Factor B2, Mitochondrial	Protein Coding	Q9H5Q4	46	GC01M246540	34.7742	https://www.genecards.org/cgi-bin/carddisp.pl?gene=TFB2M
COX14	Cytochrome C Oxidase Assembly Factor COX14	Protein Coding	Q96I36	45	GC12P060286	34.6171	https://www.genecards.org/cgi-bin/carddisp.pl?gene=COX14
TIMM22	Translocase Of Inner Mitochondrial Membrane 22	Protein Coding	Q9Y584	45	GC17P000997	34.5039	https://www.genecards.org/cgi-bin/carddisp.pl?gene=TIMM22
TIMM50	Translocase Of Inner Mitochondrial Membrane 50	Protein Coding	Q3ZCQ8	47	GC19P039480	34.431	https://www.genecards.org/cgi-bin/carddisp.pl?gene=TIMM50
NDUFC2	NADH:Ubiquinone Oxidoreductase Subunit C2	Protein Coding	O95298	48	GC11M078068	34.424	https://www.genecards.org/cgi-bin/carddisp.pl?gene=NDUFC2
MRPL44	Mitochondrial Ribosomal Protein L44	Protein Coding	Q9H9J2	48	GC02P223957	34.4208	https://www.genecards.org/cgi-bin/carddisp.pl?gene=MRPL44
VDAC1	Voltage Dependent Anion Channel 1	Protein Coding	P21796	54	GC05M133975	34.3739	https://www.genecards.org/cgi-bin/carddisp.pl?gene=VDAC1
RARS2	Arginyl-TRNA Synthetase 2, Mitochondrial	Protein Coding	Q5T160	50	GC06M094674	34.3308	https://www.genecards.org/cgi-bin/carddisp.pl?gene=RARS2
SSBP1	Single Stranded DNA Binding Protein 1	Protein Coding	Q04837	49	GC07P159543	33.8204	https://www.genecards.org/cgi-bin/carddisp.pl?gene=SSBP1
DLD	Dihydrolipoamide Dehydrogenase	Protein Coding	P09622	56	GC07P107906	33.78	https://www.genecards.org/cgi-bin/carddisp.pl?gene=DLD
TOMM20	Translocase Of Outer Mitochondrial Membrane 20	Protein Coding	Q15388	48	GC01M235109	33.7751	https://www.genecards.org/cgi-bin/carddisp.pl?gene=TOMM20
MIEF2	Mitochondrial Elongation Factor 2	Protein Coding	Q96C03	45	GC17P111539	33.7248	https://www.genecards.org/cgi-bin/carddisp.pl?gene=MIEF2
IMMT	Inner Membrane Mitochondrial Protein	Protein Coding	Q16891	48	GC02M086144	33.724	https://www.genecards.org/cgi-bin/carddisp.pl?gene=IMMT
COA5	Cytochrome C Oxidase Assembly Factor 5	Protein Coding	Q86WW8	43	GC02M098599	33.674	https://www.genecards.org/cgi-bin/carddisp.pl?gene=COA5
COA6	Cytochrome C Oxidase Assembly Factor 6	Protein Coding	Q5JTJ3	47	GC01P234374	33.2968	https://www.genecards.org/cgi-bin/carddisp.pl?gene=COA6
DARS2	Aspartyl-TRNA Synthetase 2, Mitochondrial	Protein Coding	Q6PI48	52	GC01P173824	32.8498	https://www.genecards.org/cgi-bin/carddisp.pl?gene=DARS2
LIG3	DNA Ligase 3	Protein Coding	P49916	53	GC17P034980	32.5748	https://www.genecards.org/cgi-bin/carddisp.pl?gene=LIG3
MTRFR	Mitochondrial Translation Release Factor In Rescue	Protein Coding	Q9H3J6	42	GC12P133296	32.5553	https://www.genecards.org/cgi-bin/carddisp.pl?gene=MTRFR
TIMM8A	Translocase Of Inner Mitochondrial Membrane 8A	Protein Coding	O60220	50	GC0XM101345	32.3138	https://www.genecards.org/cgi-bin/carddisp.pl?gene=TIMM8A
AGK	Acylglycerol Kinase	Protein Coding	Q53H12	50	GC07P141551	32.1652	https://www.genecards.org/cgi-bin/carddisp.pl?gene=AGK
TUFM	Tu Translation Elongation Factor, Mitochondrial	Protein Coding	P49411	52	GC16M043919	32.1527	https://www.genecards.org/cgi-bin/carddisp.pl?gene=TUFM
ATP5F1B	ATP Synthase F1 Subunit Beta	Protein Coding	P06576	50	GC12M059279	32.1349	https://www.genecards.org/cgi-bin/carddisp.pl?gene=ATP5F1B
OXA1L	OXA1L Mitochondrial Inner Membrane Protein	Protein Coding	Q15070	46	GC14P022766	32.0378	https://www.genecards.org/cgi-bin/carddisp.pl?gene=OXA1L
PNPLA8	Patatin Like Phospholipase Domain Containing 8	Protein Coding	Q9NP80	50	GC07M108470	31.7182	https://www.genecards.org/cgi-bin/carddisp.pl?gene=PNPLA8
LETM1	Leucine Zipper And EF-Hand Containing Transmembrane Protein 1	Protein Coding	O95202	52	GC04M001811	31.6726	https://www.genecards.org/cgi-bin/carddisp.pl?gene=LETM1
PET117	PET117 Cytochrome C Oxidase Chaperone	Protein Coding	Q6UWS5	39	GC20P018137	31.6005	https://www.genecards.org/cgi-bin/carddisp.pl?gene=PET117
UQCC3	Ubiquinol-Cytochrome C Reductase Complex Assembly Factor 3	Protein Coding	Q6UW78	39	GC11P062670	31.5946	https://www.genecards.org/cgi-bin/carddisp.pl?gene=UQCC3
MRM2	Mitochondrial RRNA Methyltransferase 2	Protein Coding	Q9UI43	45	GC07M002234	31.5664	https://www.genecards.org/cgi-bin/carddisp.pl?gene=MRM2
RMND1	Required For Meiotic Nuclear Division 1 Homolog	Protein Coding	Q9NWS8	46	GC06M151404	31.5147	https://www.genecards.org/cgi-bin/carddisp.pl?gene=RMND1
SOD2-OT1	SOD2 Overlapping Transcript 1	RNA Gene		18	GC06M159772	31.4728	https://www.genecards.org/cgi-bin/carddisp.pl?gene=SOD2-OT1
STXBP2	Syntaxin Binding Protein 2	Protein Coding	Q15833	53	GC19P112137	31.0484	https://www.genecards.org/cgi-bin/carddisp.pl?gene=STXBP2
COQ8A	Coenzyme Q8A	Protein Coding	Q8NI60	52	GC01P226939	30.9307	https://www.genecards.org/cgi-bin/carddisp.pl?gene=COQ8A
FANCI	FA Complementation Group I	Protein Coding	Q9NVI1	52	GC15P089243	30.5787	https://www.genecards.org/cgi-bin/carddisp.pl?gene=FANCI
BDNF-AS	BDNF Antisense RNA	RNA Gene		29	GC11P027466	30.4305	https://www.genecards.org/cgi-bin/carddisp.pl?gene=BDNF-AS
TOMM40	Translocase Of Outer Mitochondrial Membrane 40	Protein Coding	O96008	49	GC19P044890	30.3261	https://www.genecards.org/cgi-bin/carddisp.pl?gene=TOMM40
HSPD1	Heat Shock Protein Family D (Hsp60) Member 1	Protein Coding	P10809	58	GC02M197486	30.315	https://www.genecards.org/cgi-bin/carddisp.pl?gene=HSPD1
MPC1	Mitochondrial Pyruvate Carrier 1	Protein Coding	Q9Y5U8	47	GC06M166364	30.1894	https://www.genecards.org/cgi-bin/carddisp.pl?gene=MPC1
UCP2	Uncoupling Protein 2	Protein Coding	P55851	55	GC11M073974	30.148	https://www.genecards.org/cgi-bin/carddisp.pl?gene=UCP2
NDUFA8	NADH:Ubiquinone Oxidoreductase Subunit A8	Protein Coding	P51970	51	GC09M122132	30.0773	https://www.genecards.org/cgi-bin/carddisp.pl?gene=NDUFA8
MRPS25	Mitochondrial Ribosomal Protein S25	Protein Coding	P82663	45	GC03M026216	30.0303	https://www.genecards.org/cgi-bin/carddisp.pl?gene=MRPS25
CKMT2	Creatine Kinase, Mitochondrial 2	Protein Coding	P17540	51	GC05P081233	29.8626	https://www.genecards.org/cgi-bin/carddisp.pl?gene=CKMT2
FIS1	Fission, Mitochondrial 1	Protein Coding	Q9Y3D6	48	GC07M101239	29.8174	https://www.genecards.org/cgi-bin/carddisp.pl?gene=FIS1
GFER	Growth Factor, Augmenter Of Liver Regeneration	Protein Coding	P55789	53	GC16P001984	29.7685	https://www.genecards.org/cgi-bin/carddisp.pl?gene=GFER
NDUFB7	NADH:Ubiquinone Oxidoreductase Subunit B7	Protein Coding	P17568	48	GC19M014566	29.7604	https://www.genecards.org/cgi-bin/carddisp.pl?gene=NDUFB7
ATP5MK	ATP Synthase Membrane Subunit K	Protein Coding	Q96IX5	43	GC10M103397	29.612	https://www.genecards.org/cgi-bin/carddisp.pl?gene=ATP5MK
PNPT1	Polyribonucleotide Nucleotidyltransferase 1	Protein Coding	Q8TCS8	52	GC02M055634	29.5538	https://www.genecards.org/cgi-bin/carddisp.pl?gene=PNPT1
ACADVL	Acyl-CoA Dehydrogenase Very Long Chain	Protein Coding	P49748	54	GC17P111148	29.3959	https://www.genecards.org/cgi-bin/carddisp.pl?gene=ACADVL
CKMT1B	Creatine Kinase, Mitochondrial 1B	Protein Coding	P12532	46	GC15P157191	29.3539	https://www.genecards.org/cgi-bin/carddisp.pl?gene=CKMT1B
SOD2	Superoxide Dismutase 2	Protein Coding	P04179	56	GC06M159669	29.2393	https://www.genecards.org/cgi-bin/carddisp.pl?gene=SOD2
PPARGC1A	PPARG Coactivator 1 Alpha	Protein Coding	Q9UBK2	55	GC04M023755	29.2291	https://www.genecards.org/cgi-bin/carddisp.pl?gene=PPARGC1A
MTERF1	Mitochondrial Transcription Termination Factor 1	Protein Coding	Q99551	43	GC07M091692	29.223	https://www.genecards.org/cgi-bin/carddisp.pl?gene=MTERF1
TOP3A	DNA Topoisomerase III Alpha	Protein Coding	Q13472	52	GC17M018271	29.1922	https://www.genecards.org/cgi-bin/carddisp.pl?gene=TOP3A
PCK2	Phosphoenolpyruvate Carboxykinase 2, Mitochondrial	Protein Coding	Q16822	54	GC14P024094	29.1522	https://www.genecards.org/cgi-bin/carddisp.pl?gene=PCK2
TOMM70	Translocase Of Outer Mitochondrial Membrane 70	Protein Coding	O94826	44	GC03M100364	29.104	https://www.genecards.org/cgi-bin/carddisp.pl?gene=TOMM70
CARS2	Cysteinyl-TRNA Synthetase 2, Mitochondrial	Protein Coding	Q9HA77	50	GC13M110641	29.0459	https://www.genecards.org/cgi-bin/carddisp.pl?gene=CARS2
BAX	BCL2 Associated X, Apoptosis Regulator	Protein Coding	Q07812	60	GC19P048954	28.6164	https://www.genecards.org/cgi-bin/carddisp.pl?gene=BAX
SLC25A42	Solute Carrier Family 25 Member 42	Protein Coding	Q86VD7	46	GC19P019063	28.4757	https://www.genecards.org/cgi-bin/carddisp.pl?gene=SLC25A42
ERCC8	ERCC Excision Repair 8, CSA Ubiquitin Ligase Complex Subunit	Protein Coding	Q13216	50	GC05M060913	28.4296	https://www.genecards.org/cgi-bin/carddisp.pl?gene=ERCC8
TIMM17A	Translocase Of Inner Mitochondrial Membrane 17A	Protein Coding	Q99595	47	GC01P201955	28.3119	https://www.genecards.org/cgi-bin/carddisp.pl?gene=TIMM17A
MRPS27	Mitochondrial Ribosomal Protein S27	Protein Coding	Q92552	45	GC05M078392	28.3084	https://www.genecards.org/cgi-bin/carddisp.pl?gene=MRPS27
BCL2	BCL2 Apoptosis Regulator	Protein Coding	P10415	59	GC18M063123	28.2684	https://www.genecards.org/cgi-bin/carddisp.pl?gene=BCL2
MICOS13	Mitochondrial Contact Site And Cristae Organizing System Subunit 13	Protein Coding	Q5XKP0	44	GC19M091858	28.1886	https://www.genecards.org/cgi-bin/carddisp.pl?gene=MICOS13
MIEF1	Mitochondrial Elongation Factor 1	Protein Coding	Q9NQG6	44	GC22P070620	28.01	https://www.genecards.org/cgi-bin/carddisp.pl?gene=MIEF1
MICU1	Mitochondrial Calcium Uptake 1	Protein Coding	Q9BPX6	50	GC10M072367	27.9846	https://www.genecards.org/cgi-bin/carddisp.pl?gene=MICU1
MRPS7	Mitochondrial Ribosomal Protein S7	Protein Coding	Q9Y2R9	46	GC17P113127	27.9577	https://www.genecards.org/cgi-bin/carddisp.pl?gene=MRPS7
TNF	Tumor Necrosis Factor	Protein Coding	P01375	61	GC06P134820	27.9392	https://www.genecards.org/cgi-bin/carddisp.pl?gene=TNF
ISCU	Iron-Sulfur Cluster Assembly Enzyme	Protein Coding	Q9H1K1	53	GC12P108561	27.8236	https://www.genecards.org/cgi-bin/carddisp.pl?gene=ISCU
LOC130002899	ATAC-STARR-Seq Lymphoblastoid Silent Region 20452	Functional Element		9	GC09P142979	27.755	https://www.genecards.org/cgi-bin/carddisp.pl?gene=LOC130002899
CFAP92	Cilia And Flagella Associated Protein 92 (Putative)	Protein Coding	Q9ULG3	37	GC03M131832	27.4585	https://www.genecards.org/cgi-bin/carddisp.pl?gene=CFAP92
UQCRH	Ubiquinol-Cytochrome C Reductase Hinge Protein	Protein Coding	P07919	45	GC01P046303	27.3381	https://www.genecards.org/cgi-bin/carddisp.pl?gene=UQCRH
RNASEH1	Ribonuclease H1	Protein Coding	O60930	51	GC02M003565	27.2118	https://www.genecards.org/cgi-bin/carddisp.pl?gene=RNASEH1
SOD1	Superoxide Dismutase 1	Protein Coding	P00441	61	GC21P031659	27.1133	https://www.genecards.org/cgi-bin/carddisp.pl?gene=SOD1
MRPS14	Mitochondrial Ribosomal Protein S14	Protein Coding	O60783	42	GC01M175010	27.1075	https://www.genecards.org/cgi-bin/carddisp.pl?gene=MRPS14
MCU	Mitochondrial Calcium Uniporter	Protein Coding	Q8NE86	47	GC10P072692	27.055	https://www.genecards.org/cgi-bin/carddisp.pl?gene=MCU
COX11	Cytochrome C Oxidase Copper Chaperone COX11	Protein Coding	Q9Y6N1	47	GC17M054951	27.0274	https://www.genecards.org/cgi-bin/carddisp.pl?gene=COX11
CLPP	Caseinolytic Mitochondrial Matrix Peptidase Proteolytic Subunit	Protein Coding	Q16740	54	GC19P112072	26.8651	https://www.genecards.org/cgi-bin/carddisp.pl?gene=CLPP
LOC130067864	ATAC-STARR-Seq Lymphoblastoid Active Region 19325	Functional Element		7	GC22P074700	26.8227	https://www.genecards.org/cgi-bin/carddisp.pl?gene=LOC130067864
TEFM	Transcription Elongation Factor, Mitochondrial	Protein Coding	Q96QE5	43	GC17M030897	26.8029	https://www.genecards.org/cgi-bin/carddisp.pl?gene=TEFM
MRPS2	Mitochondrial Ribosomal Protein S2	Protein Coding	Q9Y399	45	GC09P135499	26.7991	https://www.genecards.org/cgi-bin/carddisp.pl?gene=MRPS2
UCP1	Uncoupling Protein 1	Protein Coding	P25874	51	GC04M140559	26.7372	https://www.genecards.org/cgi-bin/carddisp.pl?gene=UCP1
ERAL1	Era Like 12S Mitochondrial RRNA Chaperone 1	Protein Coding	O75616	46	GC17P111780	26.7327	https://www.genecards.org/cgi-bin/carddisp.pl?gene=ERAL1
ALDH2	Aldehyde Dehydrogenase 2 Family Member	Protein Coding	P05091	59	GC12P111766	26.7179	https://www.genecards.org/cgi-bin/carddisp.pl?gene=ALDH2
MRPS23	Mitochondrial Ribosomal Protein S23	Protein Coding	Q9Y3D9	45	GC17M057834	26.6263	https://www.genecards.org/cgi-bin/carddisp.pl?gene=MRPS23
ACADM	Acyl-CoA Dehydrogenase Medium Chain	Protein Coding	P11310	55	GC01P075724	26.4152	https://www.genecards.org/cgi-bin/carddisp.pl?gene=ACADM
CS	Citrate Synthase	Protein Coding	O75390	54	GC12M056271	26.3055	https://www.genecards.org/cgi-bin/carddisp.pl?gene=CS
C1QBP	Complement C1q Binding Protein	Protein Coding	Q07021	53	GC17M005432	26.2656	https://www.genecards.org/cgi-bin/carddisp.pl?gene=C1QBP
PTEN	Phosphatase And Tensin Homolog	Protein Coding	P60484	61	GC10P109367	26.233	https://www.genecards.org/cgi-bin/carddisp.pl?gene=PTEN
PMPCA	Peptidase, Mitochondrial Processing Subunit Alpha	Protein Coding	Q10713	51	GC09P136410	26.2147	https://www.genecards.org/cgi-bin/carddisp.pl?gene=PMPCA
TIMM13	Translocase Of Inner Mitochondrial Membrane 13	Protein Coding	Q9Y5L4	46	GC19M002425	26.1534	https://www.genecards.org/cgi-bin/carddisp.pl?gene=TIMM13
TIMM44	Translocase Of Inner Mitochondrial Membrane 44	Protein Coding	O43615	46	GC19M007926	26.1381	https://www.genecards.org/cgi-bin/carddisp.pl?gene=TIMM44
MTPAP	Mitochondrial Poly(A) Polymerase	Protein Coding	Q9NVV4	48	GC10M035717	26.073	https://www.genecards.org/cgi-bin/carddisp.pl?gene=MTPAP
CPT2	Carnitine Palmitoyltransferase 2	Protein Coding	P23786	59	GC01P053196	25.6515	https://www.genecards.org/cgi-bin/carddisp.pl?gene=CPT2
TIMM10	Translocase Of Inner Mitochondrial Membrane 10	Protein Coding	P62072	45	GC11M125071	25.5548	https://www.genecards.org/cgi-bin/carddisp.pl?gene=TIMM10
MRPS12	Mitochondrial Ribosomal Protein S12	Protein Coding	O15235	47	GC19P038930	25.5277	https://www.genecards.org/cgi-bin/carddisp.pl?gene=MRPS12
COQ2	Coenzyme Q2, Polyprenyltransferase	Protein Coding	Q96H96	50	GC04M083261	25.4286	https://www.genecards.org/cgi-bin/carddisp.pl?gene=COQ2
UQCRC1	Ubiquinol-Cytochrome C Reductase Core Protein 1	Protein Coding	P31930	52	GC03M048598	25.4185	https://www.genecards.org/cgi-bin/carddisp.pl?gene=UQCRC1
MRPL36	Mitochondrial Ribosomal Protein L36	Protein Coding	Q9P0J6	40	GC05M002200	25.3891	https://www.genecards.org/cgi-bin/carddisp.pl?gene=MRPL36
UCN	Urocortin	Protein Coding	P55089	46	GC02M027308	25.3531	https://www.genecards.org/cgi-bin/carddisp.pl?gene=UCN
UCP3	Uncoupling Protein 3	Protein Coding	P55916	51	GC11M074000	25.3272	https://www.genecards.org/cgi-bin/carddisp.pl?gene=UCP3
TARS2	Threonyl-TRNA Synthetase 2, Mitochondrial	Protein Coding	Q9BW92	50	GC01P164241	25.2876	https://www.genecards.org/cgi-bin/carddisp.pl?gene=TARS2
MIPEP	Mitochondrial Intermediate Peptidase	Protein Coding	Q99797	51	GC13M023730	25.2749	https://www.genecards.org/cgi-bin/carddisp.pl?gene=MIPEP
GJB2	Gap Junction Protein Beta 2	Protein Coding	P29033	54	GC13M020187	25.2506	https://www.genecards.org/cgi-bin/carddisp.pl?gene=GJB2
DIABLO	Diablo IAP-Binding Mitochondrial Protein	Protein Coding	Q9NR28	54	GC12M123647	25.125	https://www.genecards.org/cgi-bin/carddisp.pl?gene=DIABLO
SLC25A13	Solute Carrier Family 25 Member 13	Protein Coding	Q9UJS0	53	GC07M096120	25.114	https://www.genecards.org/cgi-bin/carddisp.pl?gene=SLC25A13
LOC125371495	Sharpr-MPRA Regulatory Region 9511	Functional Element		8	GC19P114978	25.1102	https://www.genecards.org/cgi-bin/carddisp.pl?gene=LOC125371495
MRPS26	Mitochondrial Ribosomal Protein S26	Protein Coding	Q9BYN8	42	GC20P008145	25.0417	https://www.genecards.org/cgi-bin/carddisp.pl?gene=MRPS26
SNCA	Synuclein Alpha	Protein Coding	P37840	60	GC04M089724	25.0016	https://www.genecards.org/cgi-bin/carddisp.pl?gene=SNCA
LYRM4	LYR Motif Containing 4	Protein Coding	Q9HD34	46	GC06M005033	24.9544	https://www.genecards.org/cgi-bin/carddisp.pl?gene=LYRM4
NFS1	NFS1 Cysteine Desulfurase	Protein Coding	Q9Y697	53	GC20M035668	24.9422	https://www.genecards.org/cgi-bin/carddisp.pl?gene=NFS1
RANBP2	RAN Binding Protein 2	Protein Coding	P49792	54	GC02P108719	24.9245	https://www.genecards.org/cgi-bin/carddisp.pl?gene=RANBP2
PTCD3	Pentatricopeptide Repeat Domain 3	Protein Coding	Q96EY7	48	GC02P086106	24.8959	https://www.genecards.org/cgi-bin/carddisp.pl?gene=PTCD3
MARS2	Methionyl-TRNA Synthetase 2, Mitochondrial	Protein Coding	Q96GW9	51	GC02P197705	24.8921	https://www.genecards.org/cgi-bin/carddisp.pl?gene=MARS2
MRPL3	Mitochondrial Ribosomal Protein L3	Protein Coding	P09001	47	GC03M131462	24.806	https://www.genecards.org/cgi-bin/carddisp.pl?gene=MRPL3
SERAC1	Serine Active Site Containing 1	Protein Coding	Q96JX3	45	GC06M158109	24.7977	https://www.genecards.org/cgi-bin/carddisp.pl?gene=SERAC1
MRPS28	Mitochondrial Ribosomal Protein S28	Protein Coding	Q9Y2Q9	46	GC08M079977	24.7725	https://www.genecards.org/cgi-bin/carddisp.pl?gene=MRPS28
MFN1	Mitofusin 1	Protein Coding	Q8IWA4	51	GC03P179347	24.7621	https://www.genecards.org/cgi-bin/carddisp.pl?gene=MFN1
LOC129934096	ATAC-STARR-Seq Lymphoblastoid Active Region 16036	Functional Element		6	GC02P073929	24.7115	https://www.genecards.org/cgi-bin/carddisp.pl?gene=LOC129934096
LINC01672	Long Intergenic Non-Protein Coding RNA 1672	RNA Gene		19	GC01P020797	24.6533	https://www.genecards.org/cgi-bin/carddisp.pl?gene=LINC01672
YME1L1	YME1 Like 1 ATPase	Protein Coding	Q96TA2	51	GC10M027110	24.6364	https://www.genecards.org/cgi-bin/carddisp.pl?gene=YME1L1
TIMM21	Translocase Of Inner Mitochondrial Membrane 21	Protein Coding	Q9BVV7	41	GC18P074148	24.5891	https://www.genecards.org/cgi-bin/carddisp.pl?gene=TIMM21
LOC130065433	ATAC-STARR-Seq Lymphoblastoid Active Region 17552	Functional Element		8	GC20P014010	24.5582	https://www.genecards.org/cgi-bin/carddisp.pl?gene=LOC130065433
SLC25A12	Solute Carrier Family 25 Member 12	Protein Coding	O75746	55	GC02M171783	24.5174	https://www.genecards.org/cgi-bin/carddisp.pl?gene=SLC25A12
ACADS	Acyl-CoA Dehydrogenase Short Chain	Protein Coding	P16219	52	GC12P133242	24.4756	https://www.genecards.org/cgi-bin/carddisp.pl?gene=ACADS
PITRM1	Pitrilysin Metallopeptidase 1	Protein Coding	Q5JRX3	49	GC10M003138	24.4464	https://www.genecards.org/cgi-bin/carddisp.pl?gene=PITRM1
MEG3	Maternally Expressed 3	RNA Gene		34	GC14P116735	24.4009	https://www.genecards.org/cgi-bin/carddisp.pl?gene=MEG3
NR3C2	Nuclear Receptor Subfamily 3 Group C Member 2	Protein Coding	P08235	55	GC04M148078	24.3954	https://www.genecards.org/cgi-bin/carddisp.pl?gene=NR3C2
COQ4	Coenzyme Q4	Protein Coding	Q9Y3A0	47	GC09P128322	24.3926	https://www.genecards.org/cgi-bin/carddisp.pl?gene=COQ4
CLPX	Caseinolytic Mitochondrial Matrix Peptidase Chaperone Subunit X	Protein Coding	O76031	51	GC15M065148	24.29	https://www.genecards.org/cgi-bin/carddisp.pl?gene=CLPX
MTRF1L	Mitochondrial Translation Release Factor 1 Like	Protein Coding	Q9UGC7	44	GC06M152987	24.2879	https://www.genecards.org/cgi-bin/carddisp.pl?gene=MTRF1L
CASP3	Caspase 3	Protein Coding	P42574	58	GC04M184627	24.0721	https://www.genecards.org/cgi-bin/carddisp.pl?gene=CASP3
ACO2	Aconitase 2	Protein Coding	Q99798	55	GC22P070710	24.0561	https://www.genecards.org/cgi-bin/carddisp.pl?gene=ACO2
TIMM9	Translocase Of Inner Mitochondrial Membrane 9	Protein Coding	Q9Y5J7	46	GC14M058408	23.9305	https://www.genecards.org/cgi-bin/carddisp.pl?gene=TIMM9
SLIRP	SRA Stem-Loop Interacting RNA Binding Protein	Protein Coding	Q9GZT3	45	GC14P077708	23.907	https://www.genecards.org/cgi-bin/carddisp.pl?gene=SLIRP
SLC25A26	Solute Carrier Family 25 Member 26	Protein Coding	Q70HW3	43	GC03P066120	23.8467	https://www.genecards.org/cgi-bin/carddisp.pl?gene=SLC25A26
SLC25A21	Solute Carrier Family 25 Member 21	Protein Coding	Q9BQT8	47	GC14M036677	23.7568	https://www.genecards.org/cgi-bin/carddisp.pl?gene=SLC25A21
TIMM10B	Translocase Of Inner Mitochondrial Membrane 10B	Protein Coding	Q9Y5J6	44	GC11P010961	23.7232	https://www.genecards.org/cgi-bin/carddisp.pl?gene=TIMM10B
SIRT3	Sirtuin 3	Protein Coding	Q9NTG7	56	GC11M000215	23.5806	https://www.genecards.org/cgi-bin/carddisp.pl?gene=SIRT3
AFG3L2	AFG3 Like Matrix AAA Peptidase Subunit 2	Protein Coding	Q9Y4W6	53	GC18M012328	23.5628	https://www.genecards.org/cgi-bin/carddisp.pl?gene=AFG3L2
DGUOK-AS1	DGUOK Antisense RNA 1	RNA Gene		22	GC02M073947	23.5398	https://www.genecards.org/cgi-bin/carddisp.pl?gene=DGUOK-AS1
HSPA9	Heat Shock Protein Family A (Hsp70) Member 9	Protein Coding	P38646	56	GC05M138554	23.2697	https://www.genecards.org/cgi-bin/carddisp.pl?gene=HSPA9
MICU2	Mitochondrial Calcium Uptake 2	Protein Coding	Q8IYU8	44	GC13M021492	23.2477	https://www.genecards.org/cgi-bin/carddisp.pl?gene=MICU2
TAMM41	TAM41 Mitochondrial Translocator Assembly And Maintenance Homolog	Protein Coding	Q96BW9	45	GC03M011721	23.2173	https://www.genecards.org/cgi-bin/carddisp.pl?gene=TAMM41
PARS2	Prolyl-TRNA Synthetase 2, Mitochondrial	Protein Coding	Q7L3T8	48	GC01M054756	23.1773	https://www.genecards.org/cgi-bin/carddisp.pl?gene=PARS2
MT-RNR2	Mitochondrially Encoded 16S RRNA	RNA Gene	Q8IVG9	25	GCMTP000953	23.1591	https://www.genecards.org/cgi-bin/carddisp.pl?gene=MT-RNR2
ATM	ATM Serine/Threonine Kinase	Protein Coding	Q13315	61	GC11P108223	23.1413	https://www.genecards.org/cgi-bin/carddisp.pl?gene=ATM
ELAC2	ElaC Ribonuclease Z 2	Protein Coding	Q9BQ52	51	GC17M012991	23.1108	https://www.genecards.org/cgi-bin/carddisp.pl?gene=ELAC2
MRPL58	Mitochondrial Ribosomal Protein L58	Protein Coding	Q14197	43	GC17P113108	23.0734	https://www.genecards.org/cgi-bin/carddisp.pl?gene=MRPL58
MILR1	Mast Cell Immunoglobulin Like Receptor 1	Protein Coding	Q7Z6M3	37	GC17P112888	23.0714	https://www.genecards.org/cgi-bin/carddisp.pl?gene=MILR1
APOE	Apolipoprotein E	Protein Coding	P02649	59	GC19P113251	23.0261	https://www.genecards.org/cgi-bin/carddisp.pl?gene=APOE
NDUFAB1	NADH:Ubiquinone Oxidoreductase Subunit AB1	Protein Coding	O14561	49	GC16M025408	22.9577	https://www.genecards.org/cgi-bin/carddisp.pl?gene=NDUFAB1
NADK2	NAD Kinase 2, Mitochondrial	Protein Coding	Q4G0N4	44	GC05M036293	22.925	https://www.genecards.org/cgi-bin/carddisp.pl?gene=NADK2
SLC25A19	Solute Carrier Family 25 Member 19	Protein Coding	Q9HC21	52	GC17M082016	22.9197	https://www.genecards.org/cgi-bin/carddisp.pl?gene=SLC25A19
COX6A1	Cytochrome C Oxidase Subunit 6A1	Protein Coding	P12074	51	GC12P120443	22.8853	https://www.genecards.org/cgi-bin/carddisp.pl?gene=COX6A1
APP	Amyloid Beta Precursor Protein	Protein Coding	P05067	59	GC21M025880	22.8049	https://www.genecards.org/cgi-bin/carddisp.pl?gene=APP
ATPAF1	ATP Synthase Mitochondrial F1 Complex Assembly Factor 1	Protein Coding	Q5TC12	45	GC01M046632	22.7533	https://www.genecards.org/cgi-bin/carddisp.pl?gene=ATPAF1
SLC25A6	Solute Carrier Family 25 Member 6	Protein Coding	P12236	50	GC0XM001386	22.7516	https://www.genecards.org/cgi-bin/carddisp.pl?gene=SLC25A6
DNAJC30	DnaJ Heat Shock Protein Family (Hsp40) Member C30	Protein Coding	Q96LL9	44	GC07M073680	22.7138	https://www.genecards.org/cgi-bin/carddisp.pl?gene=DNAJC30
PARK7	Parkinsonism Associated Deglycase	Protein Coding	Q99497	56	GC01P039429	22.7034	https://www.genecards.org/cgi-bin/carddisp.pl?gene=PARK7
EDAR	Ectodysplasin A Receptor	Protein Coding	Q9UNE0	50	GC02M108894	22.6737	https://www.genecards.org/cgi-bin/carddisp.pl?gene=EDAR
MRPL37	Mitochondrial Ribosomal Protein L37	Protein Coding	Q9BZE1	42	GC01P054185	22.6228	https://www.genecards.org/cgi-bin/carddisp.pl?gene=MRPL37
IMMP2L	Inner Mitochondrial Membrane Peptidase Subunit 2	Protein Coding	Q96T52	47	GC07M110680	22.6211	https://www.genecards.org/cgi-bin/carddisp.pl?gene=IMMP2L
TIMM17B	Translocase Of Inner Mitochondrial Membrane 17B	Protein Coding	O60830	44	GC0XM048893	22.6196	https://www.genecards.org/cgi-bin/carddisp.pl?gene=TIMM17B
COX16	Cytochrome C Oxidase Assembly Factor COX16	Protein Coding	Q9P0S2	41	GC14M070326	22.5524	https://www.genecards.org/cgi-bin/carddisp.pl?gene=COX16
MECP2	Methyl-CpG Binding Protein 2	Protein Coding	P51608	55	GC0XM154021	22.4757	https://www.genecards.org/cgi-bin/carddisp.pl?gene=MECP2
SLC25A5	Solute Carrier Family 25 Member 5	Protein Coding	P05141	52	GC0XP119468	22.4236	https://www.genecards.org/cgi-bin/carddisp.pl?gene=SLC25A5
TOMM22	Translocase Of Outer Mitochondrial Membrane 22	Protein Coding	Q9NS69	41	GC22P038681	22.4075	https://www.genecards.org/cgi-bin/carddisp.pl?gene=TOMM22
HSCB	HscB Mitochondrial Iron-Sulfur Cluster Cochaperone	Protein Coding	Q8IWL3	45	GC22P028742	22.3618	https://www.genecards.org/cgi-bin/carddisp.pl?gene=HSCB
MAVS	Mitochondrial Antiviral Signaling Protein	Protein Coding	Q7Z434	48	GC20P008170	22.3128	https://www.genecards.org/cgi-bin/carddisp.pl?gene=MAVS
IL6	Interleukin 6	Protein Coding	P05231	60	GC07P022725	22.3015	https://www.genecards.org/cgi-bin/carddisp.pl?gene=IL6
FH	Fumarate Hydratase	Protein Coding	P07954	55	GC01M241499	22.2821	https://www.genecards.org/cgi-bin/carddisp.pl?gene=FH
H19	H19 Imprinted Maternally Expressed Transcript	RNA Gene		34	GC11M001995	22.2497	https://www.genecards.org/cgi-bin/carddisp.pl?gene=H19
MRPS18A	Mitochondrial Ribosomal Protein S18A	Protein Coding	Q9NVS2	42	GC06M043671	22.2382	https://www.genecards.org/cgi-bin/carddisp.pl?gene=MRPS18A
MAPT	Microtubule Associated Protein Tau	Protein Coding	P10636	59	GC17P045894	22.2079	https://www.genecards.org/cgi-bin/carddisp.pl?gene=MAPT
RMRP	RNA Component Of Mitochondrial RNA Processing Endoribonuclease	RNA Gene		31	GC09M035655	22.1753	https://www.genecards.org/cgi-bin/carddisp.pl?gene=RMRP
TAFAZZIN	Tafazzin, Phospholipid-Lysophospholipid Transacylase	Protein Coding	Q16635	50	GC0XP154725	22.1605	https://www.genecards.org/cgi-bin/carddisp.pl?gene=TAFAZZIN
MALSU1	Mitochondrial Assembly Of Ribosomal Large Subunit 1	Protein Coding	Q96EH3	41	GC07P024085	22.1212	https://www.genecards.org/cgi-bin/carddisp.pl?gene=MALSU1
MTCH2	Mitochondrial Carrier 2	Protein Coding	Q9Y6C9	44	GC11M047604	22.095	https://www.genecards.org/cgi-bin/carddisp.pl?gene=MTCH2
TIMM8B	Translocase Of Inner Mitochondrial Membrane 8 Homolog B	Protein Coding	Q9Y5J9	44	GC11M112084	22.0782	https://www.genecards.org/cgi-bin/carddisp.pl?gene=TIMM8B
INS	Insulin	Protein Coding	P01308	56	GC11M002159	22.0099	https://www.genecards.org/cgi-bin/carddisp.pl?gene=INS
MTRF1	Mitochondrial Translation Release Factor 1	Protein Coding	O75570	45	GC13M041216	21.9446	https://www.genecards.org/cgi-bin/carddisp.pl?gene=MTRF1
MTIF2	Mitochondrial Translational Initiation Factor 2	Protein Coding	P46199	46	GC02M055236	21.9064	https://www.genecards.org/cgi-bin/carddisp.pl?gene=MTIF2
GLRX5	Glutaredoxin 5	Protein Coding	Q86SX6	49	GC14P095533	21.89	https://www.genecards.org/cgi-bin/carddisp.pl?gene=GLRX5
MPC2	Mitochondrial Pyruvate Carrier 2	Protein Coding	O95563	45	GC01M167916	21.8765	https://www.genecards.org/cgi-bin/carddisp.pl?gene=MPC2
VPS13D	Vacuolar Protein Sorting 13 Homolog D	Protein Coding	Q5THJ4	43	GC01P040414	21.8471	https://www.genecards.org/cgi-bin/carddisp.pl?gene=VPS13D
MTCH1	Mitochondrial Carrier 1	Protein Coding	Q9NZJ7	44	GC06M093938	21.7964	https://www.genecards.org/cgi-bin/carddisp.pl?gene=MTCH1
SLC25A46	Solute Carrier Family 25 Member 46	Protein Coding	Q96AG3	47	GC05P110738	21.7838	https://www.genecards.org/cgi-bin/carddisp.pl?gene=SLC25A46
TTN	Titin	Protein Coding	Q8WZ42	56	GC02M178525	21.7288	https://www.genecards.org/cgi-bin/carddisp.pl?gene=TTN
NDUFC2-KCTD14	NDUFC2-KCTD14 Readthrough	Protein Coding	E9PQ53	30	GC11M078015	21.7254	https://www.genecards.org/cgi-bin/carddisp.pl?gene=NDUFC2-KCTD14
MRPS18B	Mitochondrial Ribosomal Protein S18B	Protein Coding	Q9Y676	43	GC06P030617	21.7005	https://www.genecards.org/cgi-bin/carddisp.pl?gene=MRPS18B
BCL2L1	BCL2 Like 1	Protein Coding	Q07817	57	GC20M031664	21.607	https://www.genecards.org/cgi-bin/carddisp.pl?gene=BCL2L1
MRPS18C	Mitochondrial Ribosomal Protein S18C	Protein Coding	Q9Y3D5	40	GC04P083455	21.5938	https://www.genecards.org/cgi-bin/carddisp.pl?gene=MRPS18C
SARS2	Seryl-TRNA Synthetase 2, Mitochondrial	Protein Coding	Q9NP81	53	GC19M092748	21.5904	https://www.genecards.org/cgi-bin/carddisp.pl?gene=SARS2
MRPL43	Mitochondrial Ribosomal Protein L43	Protein Coding	Q8N983	43	GC10M100969	21.5603	https://www.genecards.org/cgi-bin/carddisp.pl?gene=MRPL43
MRPS35	Mitochondrial Ribosomal Protein S35	Protein Coding	P82673	41	GC12P027710	21.5501	https://www.genecards.org/cgi-bin/carddisp.pl?gene=MRPS35
LOC130000896	ATAC-STARR-Seq Lymphoblastoid Active Region 27747	Functional Element		7	GC08P102326	21.5129	https://www.genecards.org/cgi-bin/carddisp.pl?gene=LOC130000896
MRPL41	Mitochondrial Ribosomal Protein L41	Protein Coding	Q8IXM3	37	GC09P137551	21.4472	https://www.genecards.org/cgi-bin/carddisp.pl?gene=MRPL41
CHCHD4	Coiled-Coil-Helix-Coiled-Coil-Helix Domain Containing 4	Protein Coding	Q8N4Q1	44	GC03M026204	21.413	https://www.genecards.org/cgi-bin/carddisp.pl?gene=CHCHD4
LOC129993885	ATAC-STARR-Seq Lymphoblastoid Active Region 22547	Functional Element		5	GC05P053561	21.4016	https://www.genecards.org/cgi-bin/carddisp.pl?gene=LOC129993885
TIMM23	Translocase Of Inner Mitochondrial Membrane 23	Protein Coding	O14925	43	GC10P045972	21.3061	https://www.genecards.org/cgi-bin/carddisp.pl?gene=TIMM23
MRPS5	Mitochondrial Ribosomal Protein S5	Protein Coding	P82675	41	GC02M100799	21.2994	https://www.genecards.org/cgi-bin/carddisp.pl?gene=MRPS5
MMUT	Methylmalonyl-CoA Mutase	Protein Coding	P22033	54	GC06M049430	21.2948	https://www.genecards.org/cgi-bin/carddisp.pl?gene=MMUT
SLC25A1	Solute Carrier Family 25 Member 1	Protein Coding	P53007	54	GC22M020036	21.2842	https://www.genecards.org/cgi-bin/carddisp.pl?gene=SLC25A1
ETFDH	Electron Transfer Flavoprotein Dehydrogenase	Protein Coding	Q16134	54	GC04P158672	21.2673	https://www.genecards.org/cgi-bin/carddisp.pl?gene=ETFDH
OPA3	Outer Mitochondrial Membrane Lipid Metabolism Regulator OPA3	Protein Coding	Q9H6K4	47	GC19M045527	21.1537	https://www.genecards.org/cgi-bin/carddisp.pl?gene=OPA3
FDX2-ZGLP1	FDX2-ZGLP1 Readthrough	RNA Gene		11	GC19M093705	21.1342	https://www.genecards.org/cgi-bin/carddisp.pl?gene=FDX2-ZGLP1
RAB33A	RAB33A, Member RAS Oncogene Family	Protein Coding	Q14088	45	GC0XP130110	21.113	https://www.genecards.org/cgi-bin/carddisp.pl?gene=RAB33A
MUL1	Mitochondrial E3 Ubiquitin Protein Ligase 1	Protein Coding	Q969V5	41	GC01M020499	21.1033	https://www.genecards.org/cgi-bin/carddisp.pl?gene=MUL1
MRPL23	Mitochondrial Ribosomal Protein L23	Protein Coding	Q16540	45	GC11P010665	21.0662	https://www.genecards.org/cgi-bin/carddisp.pl?gene=MRPL23
MRPL49	Mitochondrial Ribosomal Protein L49	Protein Coding	Q13405	44	GC11P089053	20.9371	https://www.genecards.org/cgi-bin/carddisp.pl?gene=MRPL49
MRPS30	Mitochondrial Ribosomal Protein S30	Protein Coding	Q9NP92	41	GC05P044808	20.9255	https://www.genecards.org/cgi-bin/carddisp.pl?gene=MRPS30
MRPS10	Mitochondrial Ribosomal Protein S10	Protein Coding	P82664	41	GC06M042206	20.8796	https://www.genecards.org/cgi-bin/carddisp.pl?gene=MRPS10
MPV17L2	MPV17 Mitochondrial Inner Membrane Protein Like 2	Protein Coding	Q567V2	41	GC19P018193	20.8613	https://www.genecards.org/cgi-bin/carddisp.pl?gene=MPV17L2
MRPL40	Mitochondrial Ribosomal Protein L40	Protein Coding	Q9NQ50	44	GC22P069909	20.8604	https://www.genecards.org/cgi-bin/carddisp.pl?gene=MRPL40
CFTR	CF Transmembrane Conductance Regulator	Protein Coding	P13569	61	GC07P117287	20.81	https://www.genecards.org/cgi-bin/carddisp.pl?gene=CFTR
MRPL51	Mitochondrial Ribosomal Protein L51	Protein Coding	Q4U2R6	36	GC12M006491	20.806	https://www.genecards.org/cgi-bin/carddisp.pl?gene=MRPL51
KARS1	Lysyl-TRNA Synthetase 1	Protein Coding	Q15046	54	GC16M076000	20.7771	https://www.genecards.org/cgi-bin/carddisp.pl?gene=KARS1
GRPEL1	GrpE Like 1, Mitochondrial	Protein Coding	Q9HAV7	48	GC04M007058	20.7714	https://www.genecards.org/cgi-bin/carddisp.pl?gene=GRPEL1
SDHC	Succinate Dehydrogenase Complex Subunit C	Protein Coding	Q99643	51	GC01P161314	20.737	https://www.genecards.org/cgi-bin/carddisp.pl?gene=SDHC
AKT1	AKT Serine/Threonine Kinase 1	Protein Coding	P31749	62	GC14M104769	20.7302	https://www.genecards.org/cgi-bin/carddisp.pl?gene=AKT1
SFXN4	Sideroflexin 4	Protein Coding	Q6P4A7	45	GC10M119140	20.7133	https://www.genecards.org/cgi-bin/carddisp.pl?gene=SFXN4
ETHE1	ETHE1 Persulfide Dioxygenase	Protein Coding	O95571	50	GC19M043506	20.683	https://www.genecards.org/cgi-bin/carddisp.pl?gene=ETHE1
SLC25A20	Solute Carrier Family 25 Member 20	Protein Coding	O43772	52	GC03M048941	20.6709	https://www.genecards.org/cgi-bin/carddisp.pl?gene=SLC25A20
MRPL42	Mitochondrial Ribosomal Protein L42	Protein Coding	Q9Y6G3	43	GC12P093467	20.6641	https://www.genecards.org/cgi-bin/carddisp.pl?gene=MRPL42
MRPL18	Mitochondrial Ribosomal Protein L18	Protein Coding	Q9H0U6	38	GC06P159789	20.6524	https://www.genecards.org/cgi-bin/carddisp.pl?gene=MRPL18
C19orf12	Chromosome 19 Open Reading Frame 12	Protein Coding	Q9NSK7	43	GC19M092604	20.5848	https://www.genecards.org/cgi-bin/carddisp.pl?gene=C19orf12
MRPL50	Mitochondrial Ribosomal Protein L50	Protein Coding	Q8N5N7	40	GC09M101387	20.5819	https://www.genecards.org/cgi-bin/carddisp.pl?gene=MRPL50
MRPL16	Mitochondrial Ribosomal Protein L16	Protein Coding	Q9NX20	40	GC11M125133	20.5747	https://www.genecards.org/cgi-bin/carddisp.pl?gene=MRPL16
MTG1	Mitochondrial Ribosome Associated GTPase 1	Protein Coding	Q9BT17	42	GC10P133394	20.5555	https://www.genecards.org/cgi-bin/carddisp.pl?gene=MTG1
CBS	Cystathionine Beta-Synthase	Protein Coding	P35520	60	GC21M043053	20.5499	https://www.genecards.org/cgi-bin/carddisp.pl?gene=CBS
MRPL13	Mitochondrial Ribosomal Protein L13	Protein Coding	Q9BYD1	40	GC08M120377	20.5451	https://www.genecards.org/cgi-bin/carddisp.pl?gene=MRPL13
MRPL47	Mitochondrial Ribosomal Protein L47	Protein Coding	Q9HD33	38	GC03M179588	20.5356	https://www.genecards.org/cgi-bin/carddisp.pl?gene=MRPL47
ACAT1	Acetyl-CoA Acetyltransferase 1	Protein Coding	P24752	56	GC11P108121	20.4783	https://www.genecards.org/cgi-bin/carddisp.pl?gene=ACAT1
SLC25A24	Solute Carrier Family 25 Member 24	Protein Coding	Q6NUK1	51	GC01M108134	20.4437	https://www.genecards.org/cgi-bin/carddisp.pl?gene=SLC25A24
PDZD9	PDZ Domain Containing 9	Protein Coding	Q8IXQ8	37	GC16M021957	20.4122	https://www.genecards.org/cgi-bin/carddisp.pl?gene=PDZD9
MICOS10	Mitochondrial Contact Site And Cristae Organizing System Subunit 10	Protein Coding	Q5TGZ0	39	GC01P041124	20.3857	https://www.genecards.org/cgi-bin/carddisp.pl?gene=MICOS10
MRPL22	Mitochondrial Ribosomal Protein L22	Protein Coding	Q9NWU5	42	GC05P154941	20.3735	https://www.genecards.org/cgi-bin/carddisp.pl?gene=MRPL22
MRPL28	Mitochondrial Ribosomal Protein L28	Protein Coding	Q13084	42	GC16M000366	20.3572	https://www.genecards.org/cgi-bin/carddisp.pl?gene=MRPL28
MRPL4	Mitochondrial Ribosomal Protein L4	Protein Coding	Q9BYD3	43	GC19P010251	20.322	https://www.genecards.org/cgi-bin/carddisp.pl?gene=MRPL4
CLPB	ClpB Family Mitochondrial Disaggregase	Protein Coding	Q9H078	52	GC11M125649	20.3014	https://www.genecards.org/cgi-bin/carddisp.pl?gene=CLPB
MRPL38	Mitochondrial Ribosomal Protein L38	Protein Coding	Q96DV4	42	GC17M082405	20.2774	https://www.genecards.org/cgi-bin/carddisp.pl?gene=MRPL38
MRPL32	Mitochondrial Ribosomal Protein L32	Protein Coding	Q9BYC8	39	GC07P042933	20.2302	https://www.genecards.org/cgi-bin/carddisp.pl?gene=MRPL32
LRRK2	Leucine Rich Repeat Kinase 2	Protein Coding	Q5S007	58	GC12P040196	20.22	https://www.genecards.org/cgi-bin/carddisp.pl?gene=LRRK2
MRPS11	Mitochondrial Ribosomal Protein S11	Protein Coding	P82912	40	GC15P088467	20.1995	https://www.genecards.org/cgi-bin/carddisp.pl?gene=MRPS11
PRORP	Protein Only RNase P Catalytic Subunit	Protein Coding	O15091	45	GC14P046125	20.1924	https://www.genecards.org/cgi-bin/carddisp.pl?gene=PRORP
MRPL34	Mitochondrial Ribosomal Protein L34	Protein Coding	Q9BQ48	40	GC19P112611	20.1878	https://www.genecards.org/cgi-bin/carddisp.pl?gene=MRPL34
MRPL19	Mitochondrial Ribosomal Protein L19	Protein Coding	P49406	44	GC02P075646	20.1766	https://www.genecards.org/cgi-bin/carddisp.pl?gene=MRPL19
MRPL10	Mitochondrial Ribosomal Protein L10	Protein Coding	Q7Z7H8	39	GC17M078123	20.1654	https://www.genecards.org/cgi-bin/carddisp.pl?gene=MRPL10
MRPS21	Mitochondrial Ribosomal Protein S21	Protein Coding	P82921	41	GC01P164227	20.1484	https://www.genecards.org/cgi-bin/carddisp.pl?gene=MRPS21
MRPL46	Mitochondrial Ribosomal Protein L46	Protein Coding	Q9H2W6	44	GC15M148587	20.1463	https://www.genecards.org/cgi-bin/carddisp.pl?gene=MRPL46
MRPS24	Mitochondrial Ribosomal Protein S24	Protein Coding	Q96EL2	40	GC07M043868	20.127	https://www.genecards.org/cgi-bin/carddisp.pl?gene=MRPS24
MRPS17	Mitochondrial Ribosomal Protein S17	Protein Coding	Q9Y2R5	43	GC07P060622	20.1242	https://www.genecards.org/cgi-bin/carddisp.pl?gene=MRPS17
MRPS15	Mitochondrial Ribosomal Protein S15	Protein Coding	P82914	39	GC01M036455	20.1234	https://www.genecards.org/cgi-bin/carddisp.pl?gene=MRPS15
CKMT1A	Creatine Kinase, Mitochondrial 1A	Protein Coding	P12532	40	GC15P157195	20.1017	https://www.genecards.org/cgi-bin/carddisp.pl?gene=CKMT1A
ACADL	Acyl-CoA Dehydrogenase Long Chain	Protein Coding	P28330	48	GC02M210187	20.1015	https://www.genecards.org/cgi-bin/carddisp.pl?gene=ACADL
MCUR1	Mitochondrial Calcium Uniporter Regulator 1	Protein Coding	Q96AQ8	43	GC06M013788	20.0998	https://www.genecards.org/cgi-bin/carddisp.pl?gene=MCUR1
TIMM29	Translocase Of Inner Mitochondrial Membrane 29	Protein Coding	Q9BSF4	37	GC19P112311	20.0968	https://www.genecards.org/cgi-bin/carddisp.pl?gene=TIMM29
MRPL15	Mitochondrial Ribosomal Protein L15	Protein Coding	Q9P015	44	GC08P054135	20.0845	https://www.genecards.org/cgi-bin/carddisp.pl?gene=MRPL15
MRPL24	Mitochondrial Ribosomal Protein L24	Protein Coding	Q96A35	43	GC01M156737	20.0685	https://www.genecards.org/cgi-bin/carddisp.pl?gene=MRPL24
DNAH8	Dynein Axonemal Heavy Chain 8	Protein Coding	Q96JB1	47	GC06P135004	20.0469	https://www.genecards.org/cgi-bin/carddisp.pl?gene=DNAH8
COQ9	Coenzyme Q9	Protein Coding	O75208	50	GC16P057447	20.024	https://www.genecards.org/cgi-bin/carddisp.pl?gene=COQ9
NDUFV2-AS1	NDUFV2 Antisense RNA 1	RNA Gene		20	GC18M009073	20.0027	https://www.genecards.org/cgi-bin/carddisp.pl?gene=NDUFV2-AS1
MRM1	Mitochondrial RRNA Methyltransferase 1	Protein Coding	Q6IN84	44	GC17P112058	19.9998	https://www.genecards.org/cgi-bin/carddisp.pl?gene=MRM1
MRPL48	Mitochondrial Ribosomal Protein L48	Protein Coding	Q96GC5	38	GC11P073787	19.9944	https://www.genecards.org/cgi-bin/carddisp.pl?gene=MRPL48
MRPL11	Mitochondrial Ribosomal Protein L11	Protein Coding	Q9Y3B7	45	GC11M125451	19.9728	https://www.genecards.org/cgi-bin/carddisp.pl?gene=MRPL11
NDUFV3	NADH:Ubiquinone Oxidoreductase Subunit V3	Protein Coding	P56181	47	GC21P042879	19.9463	https://www.genecards.org/cgi-bin/carddisp.pl?gene=NDUFV3
MRPL21	Mitochondrial Ribosomal Protein L21	Protein Coding	Q7Z2W9	40	GC11M125559	19.9436	https://www.genecards.org/cgi-bin/carddisp.pl?gene=MRPL21
MTIF3	Mitochondrial Translational Initiation Factor 3	Protein Coding	Q9H2K0	43	GC13M027436	19.9407	https://www.genecards.org/cgi-bin/carddisp.pl?gene=MTIF3
HARS2	Histidyl-TRNA Synthetase 2, Mitochondrial	Protein Coding	P49590	51	GC05P152540	19.9392	https://www.genecards.org/cgi-bin/carddisp.pl?gene=HARS2
MRPS33	Mitochondrial Ribosomal Protein S33	Protein Coding	Q9Y291	40	GC07M141075	19.9254	https://www.genecards.org/cgi-bin/carddisp.pl?gene=MRPS33
MRPS9	Mitochondrial Ribosomal Protein S9	Protein Coding	P82933	44	GC02P105042	19.9236	https://www.genecards.org/cgi-bin/carddisp.pl?gene=MRPS9
MRPS6	Mitochondrial Ribosomal Protein S6	Protein Coding	P82932	43	GC21P034161	19.9091	https://www.genecards.org/cgi-bin/carddisp.pl?gene=MRPS6
TOP1MT	DNA Topoisomerase I Mitochondrial	Protein Coding	Q969P6	47	GC08M143304	19.906	https://www.genecards.org/cgi-bin/carddisp.pl?gene=TOP1MT
DNAJC19	DnaJ Heat Shock Protein Family (Hsp40) Member C19	Protein Coding	Q96DA6	50	GC03M180983	19.9037	https://www.genecards.org/cgi-bin/carddisp.pl?gene=DNAJC19
MRPL14	Mitochondrial Ribosomal Protein L14	Protein Coding	Q6P1L8	39	GC06M044113	19.9033	https://www.genecards.org/cgi-bin/carddisp.pl?gene=MRPL14
MRPL57	Mitochondrial Ribosomal Protein L57	Protein Coding	Q9BQC6	38	GC13P021176	19.8795	https://www.genecards.org/cgi-bin/carddisp.pl?gene=MRPL57
LOC130005023	ATAC-STARR-Seq Lymphoblastoid Silent Region 2977	Functional Element		8	GC10P133373	19.8559	https://www.genecards.org/cgi-bin/carddisp.pl?gene=LOC130005023
MRPS31	Mitochondrial Ribosomal Protein S31	Protein Coding	Q92665	39	GC13M040729	19.8487	https://www.genecards.org/cgi-bin/carddisp.pl?gene=MRPS31
HTRA2	HtrA Serine Peptidase 2	Protein Coding	O43464	55	GC02P074529	19.8281	https://www.genecards.org/cgi-bin/carddisp.pl?gene=HTRA2
RYR1	Ryanodine Receptor 1	Protein Coding	P21817	56	GC19P113006	19.7923	https://www.genecards.org/cgi-bin/carddisp.pl?gene=RYR1
MDH2	Malate Dehydrogenase 2	Protein Coding	P40926	55	GC07P076048	19.7504	https://www.genecards.org/cgi-bin/carddisp.pl?gene=MDH2
MRPL2	Mitochondrial Ribosomal Protein L2	Protein Coding	Q5T653	44	GC06M043054	19.7328	https://www.genecards.org/cgi-bin/carddisp.pl?gene=MRPL2
MRPL55	Mitochondrial Ribosomal Protein L55	Protein Coding	Q7Z7F7	38	GC01M228363	19.7138	https://www.genecards.org/cgi-bin/carddisp.pl?gene=MRPL55
ABCB7	ATP Binding Cassette Subfamily B Member 7	Protein Coding	O75027	53	GC0XM075053	19.69	https://www.genecards.org/cgi-bin/carddisp.pl?gene=ABCB7
MRPL20	Mitochondrial Ribosomal Protein L20	Protein Coding	Q9BYC9	39	GC01M001401	19.689	https://www.genecards.org/cgi-bin/carddisp.pl?gene=MRPL20
COQ7	Coenzyme Q7, Hydroxylase	Protein Coding	Q99807	52	GC16P019067	19.6363	https://www.genecards.org/cgi-bin/carddisp.pl?gene=COQ7
CERNA3	Competing Endogenous LncRNA 3 For MiR-645	RNA Gene		19	GC08P056323	19.5948	https://www.genecards.org/cgi-bin/carddisp.pl?gene=CERNA3
MRPL27	Mitochondrial Ribosomal Protein L27	Protein Coding	Q9P0M9	38	GC17M050367	19.5277	https://www.genecards.org/cgi-bin/carddisp.pl?gene=MRPL27
MTRES1	Mitochondrial Transcription Rescue Factor 1	Protein Coding	Q9P0P8	37	GC06P135863	19.5117	https://www.genecards.org/cgi-bin/carddisp.pl?gene=MTRES1
MRPL17	Mitochondrial Ribosomal Protein L17	Protein Coding	Q9NRX2	39	GC11M006680	19.504	https://www.genecards.org/cgi-bin/carddisp.pl?gene=MRPL17
MRRF	Mitochondrial Ribosome Recycling Factor	Protein Coding	Q96E11	43	GC09P122264	19.4677	https://www.genecards.org/cgi-bin/carddisp.pl?gene=MRRF
MRPL35	Mitochondrial Ribosomal Protein L35	Protein Coding	Q9NZE8	37	GC02P086199	19.4547	https://www.genecards.org/cgi-bin/carddisp.pl?gene=MRPL35
MRPL1	Mitochondrial Ribosomal Protein L1	Protein Coding	Q9BYD6	41	GC04P077862	19.4527	https://www.genecards.org/cgi-bin/carddisp.pl?gene=MRPL1
MRPL52	Mitochondrial Ribosomal Protein L52	Protein Coding	Q86TS9	37	GC14P022829	19.4501	https://www.genecards.org/cgi-bin/carddisp.pl?gene=MRPL52
HK1	Hexokinase 1	Protein Coding	P19367	59	GC10P069269	19.423	https://www.genecards.org/cgi-bin/carddisp.pl?gene=HK1
TRIT1	TRNA Isopentenyltransferase 1	Protein Coding	Q9H3H1	49	GC01M039842	19.416	https://www.genecards.org/cgi-bin/carddisp.pl?gene=TRIT1
CHCHD2	Coiled-Coil-Helix-Coiled-Coil-Helix Domain Containing 2	Protein Coding	Q9Y6H1	48	GC07M056101	19.3625	https://www.genecards.org/cgi-bin/carddisp.pl?gene=CHCHD2
CASP9	Caspase 9	Protein Coding	P55211	56	GC01M015491	19.3512	https://www.genecards.org/cgi-bin/carddisp.pl?gene=CASP9
SUPV3L1	Suv3 Like RNA Helicase	Protein Coding	Q8IYB8	47	GC10P069182	19.338	https://www.genecards.org/cgi-bin/carddisp.pl?gene=SUPV3L1
FDXR	Ferredoxin Reductase	Protein Coding	P22570	53	GC17M074862	19.2929	https://www.genecards.org/cgi-bin/carddisp.pl?gene=FDXR
MIR21	MicroRNA 21	RNA Gene		31	GC17P112757	19.2703	https://www.genecards.org/cgi-bin/carddisp.pl?gene=MIR21
MTOR	Mechanistic Target Of Rapamycin Kinase	Protein Coding	P42345	64	GC01M011106	19.2648	https://www.genecards.org/cgi-bin/carddisp.pl?gene=MTOR
NT5M	5',3'-Nucleotidase, Mitochondrial	Protein Coding	Q9NPB1	44	GC17P017303	19.2279	https://www.genecards.org/cgi-bin/carddisp.pl?gene=NT5M
MRPL30	Mitochondrial Ribosomal Protein L30	Protein Coding	Q8TCC3	38	GC02P099236	19.0767	https://www.genecards.org/cgi-bin/carddisp.pl?gene=MRPL30
MRPL9	Mitochondrial Ribosomal Protein L9	Protein Coding	Q9BYD2	37	GC01M151759	19.0704	https://www.genecards.org/cgi-bin/carddisp.pl?gene=MRPL9
GATB	Glutamyl-TRNA Amidotransferase Subunit B	Protein Coding	O75879	49	GC04M151670	19.0642	https://www.genecards.org/cgi-bin/carddisp.pl?gene=GATB
COX5B	Cytochrome C Oxidase Subunit 5B	Protein Coding	P10606	49	GC02P097657	19.0088	https://www.genecards.org/cgi-bin/carddisp.pl?gene=COX5B
ATAD3A	ATPase Family AAA Domain Containing 3A	Protein Coding	Q9NVI7	50	GC01P020493	18.9314	https://www.genecards.org/cgi-bin/carddisp.pl?gene=ATAD3A
BDNF	Brain Derived Neurotrophic Factor	Protein Coding	P23560	58	GC11M027654	18.9248	https://www.genecards.org/cgi-bin/carddisp.pl?gene=BDNF
MRPL33	Mitochondrial Ribosomal Protein L33	Protein Coding	O75394	38	GC02P028561	18.8689	https://www.genecards.org/cgi-bin/carddisp.pl?gene=MRPL33
TXN2	Thioredoxin 2	Protein Coding	Q99757	49	GC22M036467	18.8431	https://www.genecards.org/cgi-bin/carddisp.pl?gene=TXN2
CASP8	Caspase 8	Protein Coding	Q14790	61	GC02P201233	18.8399	https://www.genecards.org/cgi-bin/carddisp.pl?gene=CASP8
ETFA	Electron Transfer Flavoprotein Subunit Alpha	Protein Coding	P13804	53	GC15M148252	18.8066	https://www.genecards.org/cgi-bin/carddisp.pl?gene=ETFA
TARDBP	TAR DNA Binding Protein	Protein Coding	Q13148	56	GC01P039670	18.8002	https://www.genecards.org/cgi-bin/carddisp.pl?gene=TARDBP
BRCA2	BRCA2 DNA Repair Associated	Protein Coding	P51587	56	GC13P032315	18.7787	https://www.genecards.org/cgi-bin/carddisp.pl?gene=BRCA2
GDAP1	Ganglioside Induced Differentiation Associated Protein 1	Protein Coding	Q8TB36	52	GC08P074315	18.7721	https://www.genecards.org/cgi-bin/carddisp.pl?gene=GDAP1
VCP	Valosin Containing Protein	Protein Coding	P55072	58	GC09M035085	18.6776	https://www.genecards.org/cgi-bin/carddisp.pl?gene=VCP
TOMM5	Translocase Of Outer Mitochondrial Membrane 5	Protein Coding	Q8N4H5	39	GC09M037582	18.6242	https://www.genecards.org/cgi-bin/carddisp.pl?gene=TOMM5
NF1	Neurofibromin 1	Protein Coding	P21359	56	GC17P031094	18.5721	https://www.genecards.org/cgi-bin/carddisp.pl?gene=NF1
CRLS1	Cardiolipin Synthase 1	Protein Coding	Q9UJA2	48	GC20P006005	18.5698	https://www.genecards.org/cgi-bin/carddisp.pl?gene=CRLS1
NDUFA5	NADH:Ubiquinone Oxidoreductase Subunit A5	Protein Coding	Q16718	48	GC07M123536	18.5268	https://www.genecards.org/cgi-bin/carddisp.pl?gene=NDUFA5
GCSH	Glycine Cleavage System Protein H	Protein Coding	P23434	49	GC16M081081	18.5267	https://www.genecards.org/cgi-bin/carddisp.pl?gene=GCSH
ALB	Albumin	Protein Coding	P02768	58	GC04P073397	18.4933	https://www.genecards.org/cgi-bin/carddisp.pl?gene=ALB
LOC130061928	ATAC-STARR-Seq Lymphoblastoid Active Region 12955	Functional Element		9	GC17P120455	18.4516	https://www.genecards.org/cgi-bin/carddisp.pl?gene=LOC130061928
MRPL54	Mitochondrial Ribosomal Protein L54	Protein Coding	Q6P161	37	GC19P003762	18.4492	https://www.genecards.org/cgi-bin/carddisp.pl?gene=MRPL54
SLC25A15	Solute Carrier Family 25 Member 15	Protein Coding	Q9Y619	51	GC13P040789	18.4477	https://www.genecards.org/cgi-bin/carddisp.pl?gene=SLC25A15
LOC126653351	MED14-Independent Group 3 Enhancer GRCh37_chr21:35285966-35287165	Functional Element		8	GC21P033913	18.4331	https://www.genecards.org/cgi-bin/carddisp.pl?gene=LOC126653351
QRSL1	Glutaminyl-TRNA Amidotransferase Subunit QRSL1	Protein Coding	Q9H0R6	48	GC06P106629	18.4242	https://www.genecards.org/cgi-bin/carddisp.pl?gene=QRSL1
TOMM7	Translocase Of Outer Mitochondrial Membrane 7	Protein Coding	Q9P0U1	40	GC07M022872	18.2122	https://www.genecards.org/cgi-bin/carddisp.pl?gene=TOMM7
PSEN1	Presenilin 1	Protein Coding	P49768	61	GC14P073136	18.1491	https://www.genecards.org/cgi-bin/carddisp.pl?gene=PSEN1
SDHAF2	Succinate Dehydrogenase Complex Assembly Factor 2	Protein Coding	Q9NX18	51	GC11P061430	18.1482	https://www.genecards.org/cgi-bin/carddisp.pl?gene=SDHAF2
TGFB1	Transforming Growth Factor Beta 1	Protein Coding	P01137	61	GC19M041301	18.1462	https://www.genecards.org/cgi-bin/carddisp.pl?gene=TGFB1
COQ5	Coenzyme Q5, Methyltransferase	Protein Coding	Q5HYK3	49	GC12M120503	18.0898	https://www.genecards.org/cgi-bin/carddisp.pl?gene=COQ5
PGAM5	PGAM Family Member 5, Mitochondrial Serine/Threonine Protein Phosphatase	Protein Coding	Q96HS1	39	GC12P132710	18.0887	https://www.genecards.org/cgi-bin/carddisp.pl?gene=PGAM5
COX4I2	Cytochrome C Oxidase Subunit 4I2	Protein Coding	Q96KJ9	50	GC20P031637	18.0755	https://www.genecards.org/cgi-bin/carddisp.pl?gene=COX4I2
PARL	Presenilin Associated Rhomboid Like	Protein Coding	Q9H300	49	GC03M183826	17.9397	https://www.genecards.org/cgi-bin/carddisp.pl?gene=PARL
TOMM34	Translocase Of Outer Mitochondrial Membrane 34	Protein Coding	Q15785	43	GC20M044942	17.9275	https://www.genecards.org/cgi-bin/carddisp.pl?gene=TOMM34
PDHA1	Pyruvate Dehydrogenase E1 Subunit Alpha 1	Protein Coding	P08559	56	GC0XP019343	17.9222	https://www.genecards.org/cgi-bin/carddisp.pl?gene=PDHA1
HADH	Hydroxyacyl-CoA Dehydrogenase	Protein Coding	Q16836	55	GC04P107989	17.9066	https://www.genecards.org/cgi-bin/carddisp.pl?gene=HADH
LOC126807509	BRD4-Independent Group 4 Enhancer GRCh37_chr5:132201613-132202812	Functional Element		5	GC05P132865	17.8818	https://www.genecards.org/cgi-bin/carddisp.pl?gene=LOC126807509
ATP5PD	ATP Synthase Peripheral Stalk Subunit D	Protein Coding	O75947	45	GC17M081984	17.8749	https://www.genecards.org/cgi-bin/carddisp.pl?gene=ATP5PD
ACE	Angiotensin I Converting Enzyme	Protein Coding	P12821	60	GC17P063477	17.8746	https://www.genecards.org/cgi-bin/carddisp.pl?gene=ACE
PCCB	Propionyl-CoA Carboxylase Subunit Beta	Protein Coding	P05166	55	GC03P136250	17.8559	https://www.genecards.org/cgi-bin/carddisp.pl?gene=PCCB
MTFP1	Mitochondrial Fission Process 1	Protein Coding	Q9UDX5	40	GC22P070326	17.8471	https://www.genecards.org/cgi-bin/carddisp.pl?gene=MTFP1
GOT2	Glutamic-Oxaloacetic Transaminase 2	Protein Coding	P00505	56	GC16M058707	17.8352	https://www.genecards.org/cgi-bin/carddisp.pl?gene=GOT2
MRPL53	Mitochondrial Ribosomal Protein L53	Protein Coding	Q96EL3	34	GC02M074471	17.8336	https://www.genecards.org/cgi-bin/carddisp.pl?gene=MRPL53
MAPK1	Mitogen-Activated Protein Kinase 1	Protein Coding	P28482	61	GC22M021759	17.8199	https://www.genecards.org/cgi-bin/carddisp.pl?gene=MAPK1
PTPMT1	Protein Tyrosine Phosphatase Mitochondrial 1	Protein Coding	Q8WUK0	46	GC11P047792	17.7975	https://www.genecards.org/cgi-bin/carddisp.pl?gene=PTPMT1
NDUFB6	NADH:Ubiquinone Oxidoreductase Subunit B6	Protein Coding	O95139	46	GC09M032553	17.7893	https://www.genecards.org/cgi-bin/carddisp.pl?gene=NDUFB6
RLBP1	Retinaldehyde Binding Protein 1	Protein Coding	P12271	52	GC15M089209	17.7386	https://www.genecards.org/cgi-bin/carddisp.pl?gene=RLBP1
CYP27A1	Cytochrome P450 Family 27 Subfamily A Member 1	Protein Coding	Q02318	55	GC02P218781	17.7181	https://www.genecards.org/cgi-bin/carddisp.pl?gene=CYP27A1
EMSLR	E2F1 MRNA Stabilizing LncRNA	RNA Gene		19	GC07P106459	17.7105	https://www.genecards.org/cgi-bin/carddisp.pl?gene=EMSLR
NDUFAF7	NADH:Ubiquinone Oxidoreductase Complex Assembly Factor 7	Protein Coding	Q7L592	43	GC02P037231	17.7005	https://www.genecards.org/cgi-bin/carddisp.pl?gene=NDUFAF7
OMA1	OMA1 Zinc Metallopeptidase	Protein Coding	Q96E52	45	GC01M058415	17.6803	https://www.genecards.org/cgi-bin/carddisp.pl?gene=OMA1
HIF1A	Hypoxia Inducible Factor 1 Subunit Alpha	Protein Coding	Q16665	57	GC14P061695	17.6783	https://www.genecards.org/cgi-bin/carddisp.pl?gene=HIF1A
ECSIT	ECSIT Signaling Integrator	Protein Coding	Q9BQ95	47	GC19M011505	17.6494	https://www.genecards.org/cgi-bin/carddisp.pl?gene=ECSIT
ATP5MC1	ATP Synthase Membrane Subunit C Locus 1	Protein Coding	P05496	45	GC17P112583	17.6083	https://www.genecards.org/cgi-bin/carddisp.pl?gene=ATP5MC1
FMR1	Fragile X Messenger Ribonucleoprotein 1	Protein Coding	Q06787	53	GC0XP148000	17.5905	https://www.genecards.org/cgi-bin/carddisp.pl?gene=FMR1
HMGCS2	3-Hydroxy-3-Methylglutaryl-CoA Synthase 2	Protein Coding	P54868	52	GC01M119747	17.5567	https://www.genecards.org/cgi-bin/carddisp.pl?gene=HMGCS2
LOC126806913	BRD4-Independent Group 4 Enhancer GRCh37_chr3:193364377-193365576	Functional Element		8	GC03P193646	17.5115	https://www.genecards.org/cgi-bin/carddisp.pl?gene=LOC126806913
COQ8B	Coenzyme Q8B	Protein Coding	Q96D53	47	GC19M092777	17.5057	https://www.genecards.org/cgi-bin/carddisp.pl?gene=COQ8B
PAM16	Presequence Translocase Associated Motor 16	Protein Coding	Q9Y3D7	45	GC16M020500	17.4771	https://www.genecards.org/cgi-bin/carddisp.pl?gene=PAM16
MRPL45	Mitochondrial Ribosomal Protein L45	Protein Coding	Q9BRJ2	37	GC17P038297	17.4734	https://www.genecards.org/cgi-bin/carddisp.pl?gene=MRPL45
BRCA1	BRCA1 DNA Repair Associated	Protein Coding	P38398	59	GC17M043044	17.4695	https://www.genecards.org/cgi-bin/carddisp.pl?gene=BRCA1
ATP5MC3	ATP Synthase Membrane Subunit C Locus 3	Protein Coding	P48201	49	GC02M175180	17.4598	https://www.genecards.org/cgi-bin/carddisp.pl?gene=ATP5MC3
PARP1	Poly(ADP-Ribose) Polymerase 1	Protein Coding	P09874	59	GC01M226360	17.4545	https://www.genecards.org/cgi-bin/carddisp.pl?gene=PARP1
COX7B	Cytochrome C Oxidase Subunit 7B	Protein Coding	P24311	49	GC0XP077899	17.4415	https://www.genecards.org/cgi-bin/carddisp.pl?gene=COX7B
STAR	Steroidogenic Acute Regulatory Protein	Protein Coding	P49675	53	GC08M038250	17.4032	https://www.genecards.org/cgi-bin/carddisp.pl?gene=STAR
MICU3	Mitochondrial Calcium Uptake Family Member 3	Protein Coding	Q86XE3	39	GC08P017027	17.3852	https://www.genecards.org/cgi-bin/carddisp.pl?gene=MICU3
VARS1	Valyl-TRNA Synthetase 1	Protein Coding	P26640	51	GC06M093798	17.3699	https://www.genecards.org/cgi-bin/carddisp.pl?gene=VARS1
FAS	Fas Cell Surface Death Receptor	Protein Coding	P25445	59	GC10P109381	17.3519	https://www.genecards.org/cgi-bin/carddisp.pl?gene=FAS
FLAD1	Flavin Adenine Dinucleotide Synthetase 1	Protein Coding	Q8NFF5	48	GC01P154983	17.3426	https://www.genecards.org/cgi-bin/carddisp.pl?gene=FLAD1
AK2	Adenylate Kinase 2	Protein Coding	P54819	53	GC01M033007	17.3409	https://www.genecards.org/cgi-bin/carddisp.pl?gene=AK2
PTPN11	Protein Tyrosine Phosphatase Non-Receptor Type 11	Protein Coding	Q06124	62	GC12P112418	17.3389	https://www.genecards.org/cgi-bin/carddisp.pl?gene=PTPN11
IDH2	Isocitrate Dehydrogenase (NADP(+)) 2	Protein Coding	P48735	60	GC15M090083	17.3352	https://www.genecards.org/cgi-bin/carddisp.pl?gene=IDH2
BID	BH3 Interacting Domain Death Agonist	Protein Coding	P55957	54	GC22M017734	17.3293	https://www.genecards.org/cgi-bin/carddisp.pl?gene=BID
CHCHD3	Coiled-Coil-Helix-Coiled-Coil-Helix Domain Containing 3	Protein Coding	Q9NX63	45	GC07M132784	17.3029	https://www.genecards.org/cgi-bin/carddisp.pl?gene=CHCHD3
COX17	Cytochrome C Oxidase Copper Chaperone COX17	Protein Coding	Q14061	45	GC03M119654	17.2882	https://www.genecards.org/cgi-bin/carddisp.pl?gene=COX17
LOC130061929	ATAC-STARR-Seq Lymphoblastoid Silent Region 9121	Functional Element		9	GC17P120456	17.2755	https://www.genecards.org/cgi-bin/carddisp.pl?gene=LOC130061929
IMMP1L	Inner Mitochondrial Membrane Peptidase Subunit 1	Protein Coding	Q96LU5	45	GC11M031432	17.2592	https://www.genecards.org/cgi-bin/carddisp.pl?gene=IMMP1L
PDSS1	Decaprenyl Diphosphate Synthase Subunit 1	Protein Coding	Q5T2R2	50	GC10P026697	17.2302	https://www.genecards.org/cgi-bin/carddisp.pl?gene=PDSS1
LIAS	Lipoic Acid Synthetase	Protein Coding	O43766	51	GC04P039526	17.2177	https://www.genecards.org/cgi-bin/carddisp.pl?gene=LIAS
BAK1	BCL2 Antagonist/Killer 1	Protein Coding	Q16611	53	GC06M033572	17.1993	https://www.genecards.org/cgi-bin/carddisp.pl?gene=BAK1
SLC25A14	Solute Carrier Family 25 Member 14	Protein Coding	O95258	43	GC0XP130339	17.1708	https://www.genecards.org/cgi-bin/carddisp.pl?gene=SLC25A14
ITGAL	Integrin Subunit Alpha L	Protein Coding	P20701	55	GC16P030472	17.1508	https://www.genecards.org/cgi-bin/carddisp.pl?gene=ITGAL
DECR1	2,4-Dienoyl-CoA Reductase 1	Protein Coding	Q16698	47	GC08P090001	17.1393	https://www.genecards.org/cgi-bin/carddisp.pl?gene=DECR1
GRIN2B	Glutamate Ionotropic Receptor NMDA Type Subunit 2B	Protein Coding	Q13224	61	GC12M013437	17.1244	https://www.genecards.org/cgi-bin/carddisp.pl?gene=GRIN2B
CTNNB1	Catenin Beta 1	Protein Coding	P35222	62	GC03P041194	17.1194	https://www.genecards.org/cgi-bin/carddisp.pl?gene=CTNNB1
TSPO	Translocator Protein	Protein Coding	B1AH88	53	GC22P043151	17.077	https://www.genecards.org/cgi-bin/carddisp.pl?gene=TSPO
GRPEL2	GrpE Like 2, Mitochondrial	Protein Coding	Q8TAA5	39	GC05P149345	17.064	https://www.genecards.org/cgi-bin/carddisp.pl?gene=GRPEL2
MTERF3	Mitochondrial Transcription Termination Factor 3	Protein Coding	Q96E29	40	GC08M096240	17.0234	https://www.genecards.org/cgi-bin/carddisp.pl?gene=MTERF3
NSUN3	NOP2/Sun RNA Methyltransferase 3	Protein Coding	Q9H649	45	GC03P094062	17.0079	https://www.genecards.org/cgi-bin/carddisp.pl?gene=NSUN3
ATP5PB	ATP Synthase Peripheral Stalk-Membrane Subunit B	Protein Coding	P24539	43	GC01P111449	17.0074	https://www.genecards.org/cgi-bin/carddisp.pl?gene=ATP5PB
EP300	E1A Binding Protein P300	Protein Coding	Q09472	61	GC22P070686	16.9915	https://www.genecards.org/cgi-bin/carddisp.pl?gene=EP300
GRSF1	G-Rich RNA Sequence Binding Factor 1	Protein Coding	Q12849	45	GC04M070815	16.9427	https://www.genecards.org/cgi-bin/carddisp.pl?gene=GRSF1
COMT	Catechol-O-Methyltransferase	Protein Coding	P21964	60	GC22P019941	16.9392	https://www.genecards.org/cgi-bin/carddisp.pl?gene=COMT
FASTKD5	FAST Kinase Domains 5	Protein Coding	Q7L8L6	39	GC20M004077	16.9325	https://www.genecards.org/cgi-bin/carddisp.pl?gene=FASTKD5
TSC2	TSC Complex Subunit 2	Protein Coding	P49815	60	GC16P080239	16.9002	https://www.genecards.org/cgi-bin/carddisp.pl?gene=TSC2
SLMO2-ATP5E	SLMO2-ATP5E Readthrough	RNA Gene		11	GC20M059028	16.8796	https://www.genecards.org/cgi-bin/carddisp.pl?gene=SLMO2-ATP5E
PHB2	Prohibitin 2	Protein Coding	Q99623	50	GC12M006965	16.8432	https://www.genecards.org/cgi-bin/carddisp.pl?gene=PHB2
MAP2K1	Mitogen-Activated Protein Kinase Kinase 1	Protein Coding	Q02750	63	GC15P066386	16.7846	https://www.genecards.org/cgi-bin/carddisp.pl?gene=MAP2K1
STMP1	Short Transmembrane Mitochondrial Protein 1	Protein Coding	E0CX11	30	GC07P136310	16.7758	https://www.genecards.org/cgi-bin/carddisp.pl?gene=STMP1
ASF1A	Anti-Silencing Function 1A Histone Chaperone	Protein Coding	Q9Y294	46	GC06P118894	16.7736	https://www.genecards.org/cgi-bin/carddisp.pl?gene=ASF1A
SLC25A25	Solute Carrier Family 25 Member 25	Protein Coding	Q6KCM7	44	GC09P128068	16.7448	https://www.genecards.org/cgi-bin/carddisp.pl?gene=SLC25A25
MTFR1	Mitochondrial Fission Regulator 1	Protein Coding	Q15390	44	GC08P065643	16.7414	https://www.genecards.org/cgi-bin/carddisp.pl?gene=MTFR1
VDAC2	Voltage Dependent Anion Channel 2	Protein Coding	P45880	53	GC10P075210	16.7253	https://www.genecards.org/cgi-bin/carddisp.pl?gene=VDAC2
MTG2	Mitochondrial Ribosome Associated GTPase 2	Protein Coding	Q9H4K7	43	GC20P062183	16.7239	https://www.genecards.org/cgi-bin/carddisp.pl?gene=MTG2
MCUB	Mitochondrial Calcium Uniporter Dominant Negative Subunit Beta	Protein Coding	Q9NWR8	38	GC04P109561	16.7213	https://www.genecards.org/cgi-bin/carddisp.pl?gene=MCUB
SLC3A1	Solute Carrier Family 3 Member 1	Protein Coding	Q07837	56	GC02P044275	16.7026	https://www.genecards.org/cgi-bin/carddisp.pl?gene=SLC3A1
TRMT5	TRNA Methyltransferase 5	Protein Coding	Q32P41	44	GC14M060971	16.6684	https://www.genecards.org/cgi-bin/carddisp.pl?gene=TRMT5
SHMT2	Serine Hydroxymethyltransferase 2	Protein Coding	P34897	55	GC12P057229	16.6566	https://www.genecards.org/cgi-bin/carddisp.pl?gene=SHMT2
MYH7	Myosin Heavy Chain 7	Protein Coding	P12883	56	GC14M023412	16.6519	https://www.genecards.org/cgi-bin/carddisp.pl?gene=MYH7
HSP90AA1	Heat Shock Protein 90 Alpha Family Class A Member 1	Protein Coding	P07900	60	GC14M102080	16.6408	https://www.genecards.org/cgi-bin/carddisp.pl?gene=HSP90AA1
MTERF2	Mitochondrial Transcription Termination Factor 2	Protein Coding	Q49AM1	37	GC12M106977	16.6099	https://www.genecards.org/cgi-bin/carddisp.pl?gene=MTERF2
HMGCL	3-Hydroxy-3-Methylglutaryl-CoA Lyase	Protein Coding	P35914	53	GC01M023801	16.589	https://www.genecards.org/cgi-bin/carddisp.pl?gene=HMGCL
ATP5PF	ATP Synthase Peripheral Stalk Subunit F6	Protein Coding	P18859	44	GC21M026154	16.5642	https://www.genecards.org/cgi-bin/carddisp.pl?gene=ATP5PF
ATP5IF1	ATP Synthase Inhibitory Factor Subunit 1	Protein Coding	Q9UII2	43	GC01P042146	16.5621	https://www.genecards.org/cgi-bin/carddisp.pl?gene=ATP5IF1
LOC130060311	ATAC-STARR-Seq Lymphoblastoid Silent Region 8214	Functional Element		5	GC17P118838	16.5484	https://www.genecards.org/cgi-bin/carddisp.pl?gene=LOC130060311
FTMT	Ferritin Mitochondrial	Protein Coding	Q8N4E7	46	GC05P121851	16.527	https://www.genecards.org/cgi-bin/carddisp.pl?gene=FTMT
PPARG	Peroxisome Proliferator Activated Receptor Gamma	Protein Coding	P37231	61	GC03P012287	16.5108	https://www.genecards.org/cgi-bin/carddisp.pl?gene=PPARG
MTARC1	Mitochondrial Amidoxime Reducing Component 1	Protein Coding	Q5VT66	38	GC01P220788	16.5065	https://www.genecards.org/cgi-bin/carddisp.pl?gene=MTARC1
SCN2A	Sodium Voltage-Gated Channel Alpha Subunit 2	Protein Coding	Q99250	57	GC02P165194	16.4514	https://www.genecards.org/cgi-bin/carddisp.pl?gene=SCN2A
SQSTM1	Sequestosome 1	Protein Coding	Q13501	58	GC05P179806	16.4333	https://www.genecards.org/cgi-bin/carddisp.pl?gene=SQSTM1
APOO	Apolipoprotein O	Protein Coding	Q9BUR5	44	GC0XM023834	16.4232	https://www.genecards.org/cgi-bin/carddisp.pl?gene=APOO
ATP5F1C	ATP Synthase F1 Subunit Gamma	Protein Coding	P36542	44	GC10P007789	16.4017	https://www.genecards.org/cgi-bin/carddisp.pl?gene=ATP5F1C
PANK2	Pantothenate Kinase 2	Protein Coding	Q9BZ23	54	GC20P008172	16.4002	https://www.genecards.org/cgi-bin/carddisp.pl?gene=PANK2
DAP3	Death Associated Protein 3	Protein Coding	P51398	46	GC01P164597	16.3818	https://www.genecards.org/cgi-bin/carddisp.pl?gene=DAP3
ASF1B	Anti-Silencing Function 1B Histone Chaperone	Protein Coding	Q9NVP2	47	GC19M014119	16.3345	https://www.genecards.org/cgi-bin/carddisp.pl?gene=ASF1B
POLR1C	RNA Polymerase I And III Subunit C	Protein Coding	O15160	53	GC06P135045	16.2909	https://www.genecards.org/cgi-bin/carddisp.pl?gene=POLR1C
LOC126806484	CDK7 Strongly-Dependent Group 2 Enhancer GRCh37_chr2:207634423-207635622	Functional Element		8	GC02P206769	16.2687	https://www.genecards.org/cgi-bin/carddisp.pl?gene=LOC126806484
EME2	Essential Meiotic Structure-Specific Endonuclease Subunit 2	Protein Coding	A4GXA9	41	GC16P080226	16.2631	https://www.genecards.org/cgi-bin/carddisp.pl?gene=EME2
PHB1	Prohibitin 1	Protein Coding	P35232	54	GC17M078189	16.2492	https://www.genecards.org/cgi-bin/carddisp.pl?gene=PHB1
IL1B	Interleukin 1 Beta	Protein Coding	P01584	56	GC02M112829	16.2474	https://www.genecards.org/cgi-bin/carddisp.pl?gene=IL1B
NDUFS5	NADH:Ubiquinone Oxidoreductase Subunit S5	Protein Coding	O43920	47	GC01P039026	16.2273	https://www.genecards.org/cgi-bin/carddisp.pl?gene=NDUFS5
SLC25A11	Solute Carrier Family 25 Member 11	Protein Coding	Q02978	51	GC17M004937	16.2238	https://www.genecards.org/cgi-bin/carddisp.pl?gene=SLC25A11
CHKB	Choline Kinase Beta	Protein Coding	Q9Y259	53	GC22M050578	16.2234	https://www.genecards.org/cgi-bin/carddisp.pl?gene=CHKB
IGF1	Insulin Like Growth Factor 1	Protein Coding	P05019	57	GC12M102395	16.195	https://www.genecards.org/cgi-bin/carddisp.pl?gene=IGF1
MIR6766	MicroRNA 6766	RNA Gene		13	GC15M089326	16.1486	https://www.genecards.org/cgi-bin/carddisp.pl?gene=MIR6766
CEP290	Centrosomal Protein 290	Protein Coding	O15078	50	GC12M088049	16.1344	https://www.genecards.org/cgi-bin/carddisp.pl?gene=CEP290
MTERF4	Mitochondrial Transcription Termination Factor 4	Protein Coding	Q7Z6M4	41	GC02M241043	16.1124	https://www.genecards.org/cgi-bin/carddisp.pl?gene=MTERF4
NRL	Neural Retina Leucine Zipper	Protein Coding	P54845	48	GC14M024078	16.0945	https://www.genecards.org/cgi-bin/carddisp.pl?gene=NRL
RAF1	Raf-1 Proto-Oncogene, Serine/Threonine Kinase	Protein Coding	P04049	63	GC03M012583	16.0941	https://www.genecards.org/cgi-bin/carddisp.pl?gene=RAF1
TMCO6	Transmembrane And Coiled-Coil Domains 6	Protein Coding	Q96DC7	38	GC05P153506	16.0813	https://www.genecards.org/cgi-bin/carddisp.pl?gene=TMCO6
LOC129996857	ATAC-STARR-Seq Lymphoblastoid Active Region 24846	Functional Element		8	GC06P141820	16.0779	https://www.genecards.org/cgi-bin/carddisp.pl?gene=LOC129996857
CPT1A	Carnitine Palmitoyltransferase 1A	Protein Coding	P50416	57	GC11M068754	16.0565	https://www.genecards.org/cgi-bin/carddisp.pl?gene=CPT1A
COX7A2	Cytochrome C Oxidase Subunit 7A2	Protein Coding	P14406	42	GC06M075237	16.0472	https://www.genecards.org/cgi-bin/carddisp.pl?gene=COX7A2
BCKDHB	Branched Chain Keto Acid Dehydrogenase E1 Subunit Beta	Protein Coding	P21953	52	GC06P080106	16.0203	https://www.genecards.org/cgi-bin/carddisp.pl?gene=BCKDHB
TIMM23B	Translocase Of Inner Mitochondrial Membrane 23 Homolog B	Protein Coding	Q5SRD1	28	GC10P049942	15.9913	https://www.genecards.org/cgi-bin/carddisp.pl?gene=TIMM23B
IFNG	Interferon Gamma	Protein Coding	P01579	59	GC12M068154	15.9617	https://www.genecards.org/cgi-bin/carddisp.pl?gene=IFNG
IL10	Interleukin 10	Protein Coding	P22301	56	GC01M206767	15.9191	https://www.genecards.org/cgi-bin/carddisp.pl?gene=IL10
COA1	Cytochrome C Oxidase Assembly Factor 1	Protein Coding	Q9GZY4	39	GC07M043608	15.9174	https://www.genecards.org/cgi-bin/carddisp.pl?gene=COA1
CDKN2A	Cyclin Dependent Kinase Inhibitor 2A	Protein Coding	Q8N726	60	GC09M021967	15.8579	https://www.genecards.org/cgi-bin/carddisp.pl?gene=CDKN2A
NARS1	Asparaginyl-TRNA Synthetase 1	Protein Coding	O43776	52	GC18M057601	15.8046	https://www.genecards.org/cgi-bin/carddisp.pl?gene=NARS1
DMD	Dystrophin	Protein Coding	P11532	54	GC0XM031097	15.7849	https://www.genecards.org/cgi-bin/carddisp.pl?gene=DMD
PPIF	Peptidylprolyl Isomerase F	Protein Coding	P30405	53	GC10P109251	15.7743	https://www.genecards.org/cgi-bin/carddisp.pl?gene=PPIF
MCCC2	Methylcrotonyl-CoA Carboxylase Subunit 2	Protein Coding	Q9HCC0	52	GC05P077745	15.7666	https://www.genecards.org/cgi-bin/carddisp.pl?gene=MCCC2
STOML2	Stomatin Like 2	Protein Coding	Q9UJZ1	45	GC09M035099	15.737	https://www.genecards.org/cgi-bin/carddisp.pl?gene=STOML2
NFKB1	Nuclear Factor Kappa B Subunit 1	Protein Coding	P19838	61	GC04P102501	15.7269	https://www.genecards.org/cgi-bin/carddisp.pl?gene=NFKB1
MTARC2	Mitochondrial Amidoxime Reducing Component 2	Protein Coding	Q969Z3	40	GC01P220748	15.7245	https://www.genecards.org/cgi-bin/carddisp.pl?gene=MTARC2
NRF1	Nuclear Respiratory Factor 1	Protein Coding	Q16656	53	GC07P129611	15.6776	https://www.genecards.org/cgi-bin/carddisp.pl?gene=NRF1
ETFB	Electron Transfer Flavoprotein Subunit Beta	Protein Coding	P38117	52	GC19M051345	15.6689	https://www.genecards.org/cgi-bin/carddisp.pl?gene=ETFB
ITGB2	Integrin Subunit Beta 2	Protein Coding	P05107	59	GC21M044885	15.668	https://www.genecards.org/cgi-bin/carddisp.pl?gene=ITGB2
ESR1	Estrogen Receptor 1	Protein Coding	P03372	62	GC06P151656	15.6262	https://www.genecards.org/cgi-bin/carddisp.pl?gene=ESR1
GATC	Glutamyl-TRNA Amidotransferase Subunit C	Protein Coding	O43716	44	GC12P120446	15.6149	https://www.genecards.org/cgi-bin/carddisp.pl?gene=GATC
OXSM	3-Oxoacyl-ACP Synthase, Mitochondrial	Protein Coding	Q9NWU1	43	GC03P025782	15.6054	https://www.genecards.org/cgi-bin/carddisp.pl?gene=OXSM
TOMM40L	Translocase Of Outer Mitochondrial Membrane 40 Like	Protein Coding	Q969M1	39	GC01P161225	15.583	https://www.genecards.org/cgi-bin/carddisp.pl?gene=TOMM40L
METTL15	Methyltransferase 15, Mitochondrial 12S RRNA N4-Cytidine	Protein Coding	A6NJ78	40	GC11P028109	15.566	https://www.genecards.org/cgi-bin/carddisp.pl?gene=METTL15
MRM3	Mitochondrial RRNA Methyltransferase 3	Protein Coding	Q9HC36	41	GC17P110861	15.5609	https://www.genecards.org/cgi-bin/carddisp.pl?gene=MRM3
SLC25A2	Solute Carrier Family 25 Member 2	Protein Coding	Q9BXI2	41	GC05M141302	15.5343	https://www.genecards.org/cgi-bin/carddisp.pl?gene=SLC25A2
DHX30	DExH-Box Helicase 30	Protein Coding	Q7L2E3	50	GC03P047802	15.528	https://www.genecards.org/cgi-bin/carddisp.pl?gene=DHX30
LMNA	Lamin A/C	Protein Coding	P02545	58	GC01P156082	15.5192	https://www.genecards.org/cgi-bin/carddisp.pl?gene=LMNA
MEF2C	Myocyte Enhancer Factor 2C	Protein Coding	Q06413	56	GC05M088718	15.511	https://www.genecards.org/cgi-bin/carddisp.pl?gene=MEF2C
ABCB10	ATP Binding Cassette Subfamily B Member 10	Protein Coding	Q9NRK6	49	GC01M229516	15.4933	https://www.genecards.org/cgi-bin/carddisp.pl?gene=ABCB10
FECH	Ferrochelatase	Protein Coding	P22830	55	GC18M057544	15.4748	https://www.genecards.org/cgi-bin/carddisp.pl?gene=FECH
SLC6A3	Solute Carrier Family 6 Member 3	Protein Coding	Q01959	59	GC05M001392	15.4734	https://www.genecards.org/cgi-bin/carddisp.pl?gene=SLC6A3
MTHFR	Methylenetetrahydrofolate Reductase	Protein Coding	P42898	56	GC01M011785	15.4729	https://www.genecards.org/cgi-bin/carddisp.pl?gene=MTHFR
GNB1	G Protein Subunit Beta 1	Protein Coding	P62873	54	GC01M001785	15.4717	https://www.genecards.org/cgi-bin/carddisp.pl?gene=GNB1
SLC39A8	Solute Carrier Family 39 Member 8	Protein Coding	Q9C0K1	52	GC04M102252	15.4681	https://www.genecards.org/cgi-bin/carddisp.pl?gene=SLC39A8
PDP1	Pyruvate Dehydrogenase Phosphatase Catalytic Subunit 1	Protein Coding	Q9P0J1	56	GC08P093857	15.468	https://www.genecards.org/cgi-bin/carddisp.pl?gene=PDP1
DYNC1H1	Dynein Cytoplasmic 1 Heavy Chain 1	Protein Coding	Q14204	53	GC14P115794	15.4594	https://www.genecards.org/cgi-bin/carddisp.pl?gene=DYNC1H1
GLUD1	Glutamate Dehydrogenase 1	Protein Coding	P00367	59	GC10M087050	15.4314	https://www.genecards.org/cgi-bin/carddisp.pl?gene=GLUD1
TMX2-CTNND1	TMX2-CTNND1 Readthrough (NMD Candidate)	RNA Gene		23	GC11P057712	15.4136	https://www.genecards.org/cgi-bin/carddisp.pl?gene=TMX2-CTNND1
CPOX	Coproporphyrinogen Oxidase	Protein Coding	P36551	53	GC03M098576	15.3922	https://www.genecards.org/cgi-bin/carddisp.pl?gene=CPOX
OGDH	Oxoglutarate Dehydrogenase	Protein Coding	Q02218	55	GC07P044606	15.3061	https://www.genecards.org/cgi-bin/carddisp.pl?gene=OGDH
ALMS1	ALMS1 Centrosome And Basal Body Associated Protein	Protein Coding	Q8TCU4	49	GC02P073385	15.2868	https://www.genecards.org/cgi-bin/carddisp.pl?gene=ALMS1
SCN5A	Sodium Voltage-Gated Channel Alpha Subunit 5	Protein Coding	Q14524	59	GC03M038707	15.2612	https://www.genecards.org/cgi-bin/carddisp.pl?gene=SCN5A
KCNMA1	Potassium Calcium-Activated Channel Subfamily M Alpha 1	Protein Coding	Q12791	57	GC10M076869	15.222	https://www.genecards.org/cgi-bin/carddisp.pl?gene=KCNMA1
OTC	Ornithine Transcarbamylase	Protein Coding	P00480	55	GC0XP038335	15.2184	https://www.genecards.org/cgi-bin/carddisp.pl?gene=OTC
MAOA	Monoamine Oxidase A	Protein Coding	P21397	58	GC0XP043654	15.205	https://www.genecards.org/cgi-bin/carddisp.pl?gene=MAOA
CSNK2A1	Casein Kinase 2 Alpha 1	Protein Coding	P68400	59	GC20M000472	15.1988	https://www.genecards.org/cgi-bin/carddisp.pl?gene=CSNK2A1
COQ6	Coenzyme Q6, Monooxygenase	Protein Coding	Q9Y2Z9	51	GC14P073949	15.1878	https://www.genecards.org/cgi-bin/carddisp.pl?gene=COQ6
DLEU2	Deleted In Lymphocytic Leukemia 2	RNA Gene		30	GC13M049913	15.126	https://www.genecards.org/cgi-bin/carddisp.pl?gene=DLEU2
SLC25A22	Solute Carrier Family 25 Member 22	Protein Coding	Q9H936	49	GC11M011837	15.1246	https://www.genecards.org/cgi-bin/carddisp.pl?gene=SLC25A22
GPAM	Glycerol-3-Phosphate Acyltransferase, Mitochondrial	Protein Coding	Q9HCL2	50	GC10M112148	15.0901	https://www.genecards.org/cgi-bin/carddisp.pl?gene=GPAM
HIBCH	3-Hydroxyisobutyryl-CoA Hydrolase	Protein Coding	Q6NVY1	50	GC02M190189	15.0756	https://www.genecards.org/cgi-bin/carddisp.pl?gene=HIBCH
DNMT3A	DNA Methyltransferase 3 Alpha	Protein Coding	Q9Y6K1	60	GC02M025228	15.06	https://www.genecards.org/cgi-bin/carddisp.pl?gene=DNMT3A
TOMM6	Translocase Of Outer Mitochondrial Membrane 6	Protein Coding	Q96B49	33	GC06P041787	15.0493	https://www.genecards.org/cgi-bin/carddisp.pl?gene=TOMM6
SDHAF3	Succinate Dehydrogenase Complex Assembly Factor 3	Protein Coding	Q9NRP4	41	GC07P097116	15.0456	https://www.genecards.org/cgi-bin/carddisp.pl?gene=SDHAF3
SLC25A23	Solute Carrier Family 25 Member 23	Protein Coding	Q9BV35	41	GC19M006436	15.0367	https://www.genecards.org/cgi-bin/carddisp.pl?gene=SLC25A23
MSS51	MSS51 Mitochondrial Translational Activator	Protein Coding	Q4VC12	39	GC10M073423	15.0233	https://www.genecards.org/cgi-bin/carddisp.pl?gene=MSS51
SMARCB1	SWI/SNF Related, Matrix Associated, Actin Dependent Regulator Of Chromatin, Subfamily B, Member 1	Protein Coding	Q12824	55	GC22P023786	14.9822	https://www.genecards.org/cgi-bin/carddisp.pl?gene=SMARCB1
LOC130058203	ATAC-STARR-Seq Lymphoblastoid Silent Region 7014	Functional Element		5	GC16P089207	14.9764	https://www.genecards.org/cgi-bin/carddisp.pl?gene=LOC130058203
PTCD1	Pentatricopeptide Repeat Domain 1	Protein Coding	O75127	43	GC07M100012	14.9734	https://www.genecards.org/cgi-bin/carddisp.pl?gene=PTCD1
SETD2	SET Domain Containing 2, Histone Lysine Methyltransferase	Protein Coding	Q9BYW2	56	GC03M047033	14.9255	https://www.genecards.org/cgi-bin/carddisp.pl?gene=SETD2
F2	Coagulation Factor II, Thrombin	Protein Coding	P00734	59	GC11P047736	14.9137	https://www.genecards.org/cgi-bin/carddisp.pl?gene=F2
XIAP	X-Linked Inhibitor Of Apoptosis	Protein Coding	P98170	60	GC0XP123859	14.8819	https://www.genecards.org/cgi-bin/carddisp.pl?gene=XIAP
TRNT1	TRNA Nucleotidyl Transferase 1	Protein Coding	Q96Q11	50	GC03P003126	14.8803	https://www.genecards.org/cgi-bin/carddisp.pl?gene=TRNT1
CPS1	Carbamoyl-Phosphate Synthase 1	Protein Coding	P31327	57	GC02P210477	14.8456	https://www.genecards.org/cgi-bin/carddisp.pl?gene=CPS1
TRAP1	TNF Receptor Associated Protein 1	Protein Coding	Q12931	49	GC16M020486	14.8319	https://www.genecards.org/cgi-bin/carddisp.pl?gene=TRAP1
SBF1	SET Binding Factor 1	Protein Coding	O95248	51	GC22M077252	14.8067	https://www.genecards.org/cgi-bin/carddisp.pl?gene=SBF1
PQBP1	Polyglutamine Binding Protein 1	Protein Coding	O60828	48	GC0XP048890	14.7916	https://www.genecards.org/cgi-bin/carddisp.pl?gene=PQBP1
CDH23	Cadherin Related 23	Protein Coding	Q9H251	54	GC10P071396	14.7914	https://www.genecards.org/cgi-bin/carddisp.pl?gene=CDH23
RPUSD4	RNA Pseudouridine Synthase D4	Protein Coding	Q96CM3	40	GC11M126202	14.7907	https://www.genecards.org/cgi-bin/carddisp.pl?gene=RPUSD4
ATP5MC2	ATP Synthase Membrane Subunit C Locus 2	Protein Coding	Q06055	45	GC12M053790	14.7852	https://www.genecards.org/cgi-bin/carddisp.pl?gene=ATP5MC2
VDAC3	Voltage Dependent Anion Channel 3	Protein Coding	Q9Y277	50	GC08P042392	14.7831	https://www.genecards.org/cgi-bin/carddisp.pl?gene=VDAC3
DLAT	Dihydrolipoamide S-Acetyltransferase	Protein Coding	P10515	54	GC11P112501	14.7343	https://www.genecards.org/cgi-bin/carddisp.pl?gene=DLAT
LOC130060303	ATAC-STARR-Seq Lymphoblastoid Active Region 11742	Functional Element		5	GC17P118830	14.7213	https://www.genecards.org/cgi-bin/carddisp.pl?gene=LOC130060303
SAMM50	SAMM50 Sorting And Assembly Machinery Component	Protein Coding	Q9Y512	45	GC22P043955	14.7054	https://www.genecards.org/cgi-bin/carddisp.pl?gene=SAMM50
MPC1L	Mitochondrial Pyruvate Carrier 1 Like	Protein Coding	P0DKB6	22	GC0XP040623	14.7013	https://www.genecards.org/cgi-bin/carddisp.pl?gene=MPC1L
STXBP1	Syntaxin Binding Protein 1	Protein Coding	P61764	58	GC09P141358	14.6724	https://www.genecards.org/cgi-bin/carddisp.pl?gene=STXBP1
LARS1	Leucyl-TRNA Synthetase 1	Protein Coding	Q9P2J5	52	GC05M146114	14.6638	https://www.genecards.org/cgi-bin/carddisp.pl?gene=LARS1
C11orf65	Chromosome 11 Open Reading Frame 65	Protein Coding	Q8NCR3	40	GC11M108308	14.6632	https://www.genecards.org/cgi-bin/carddisp.pl?gene=C11orf65
NR4A2	Nuclear Receptor Subfamily 4 Group A Member 2	Protein Coding	P43354	54	GC02M156324	14.6631	https://www.genecards.org/cgi-bin/carddisp.pl?gene=NR4A2
AARS1	Alanyl-TRNA Synthetase 1	Protein Coding	P49588	53	GC16M073241	14.6541	https://www.genecards.org/cgi-bin/carddisp.pl?gene=AARS1
RHOT1	Ras Homolog Family Member T1	Protein Coding	Q8IXI2	52	GC17P032142	14.6246	https://www.genecards.org/cgi-bin/carddisp.pl?gene=RHOT1
LOC112552175	Sharpr-MPRA Regulatory Region 9916	Functional Element		5	GC19P005903	14.6235	https://www.genecards.org/cgi-bin/carddisp.pl?gene=LOC112552175
CYP11A1	Cytochrome P450 Family 11 Subfamily A Member 1	Protein Coding	P05108	56	GC15M074337	14.6012	https://www.genecards.org/cgi-bin/carddisp.pl?gene=CYP11A1
NRXN1	Neurexin 1	Protein Coding	Q9ULB1	57	GC02M049918	14.5864	https://www.genecards.org/cgi-bin/carddisp.pl?gene=NRXN1
CKB	Creatine Kinase B	Protein Coding	P12277	54	GC14M103519	14.5574	https://www.genecards.org/cgi-bin/carddisp.pl?gene=CKB
TMEM126A	Transmembrane Protein 126A	Protein Coding	Q9H061	48	GC11P085647	14.555	https://www.genecards.org/cgi-bin/carddisp.pl?gene=TMEM126A
PGR-AS1	PGR Antisense RNA 1	RNA Gene		18	GC11P101131	14.5335	https://www.genecards.org/cgi-bin/carddisp.pl?gene=PGR-AS1
ATP5ME	ATP Synthase Membrane Subunit E	Protein Coding	P56385	44	GC04M004774	14.5312	https://www.genecards.org/cgi-bin/carddisp.pl?gene=ATP5ME
PIK3CA	Phosphatidylinositol-4,5-Bisphosphate 3-Kinase Catalytic Subunit Alpha	Protein Coding	P42336	61	GC03P179148	14.5011	https://www.genecards.org/cgi-bin/carddisp.pl?gene=PIK3CA
LOC130058183	ATAC-STARR-Seq Lymphoblastoid Silent Region 7002	Functional Element		8	GC16P089153	14.479	https://www.genecards.org/cgi-bin/carddisp.pl?gene=LOC130058183
FMC1	Formation Of Mitochondrial Complex V Assembly Factor 1 Homolog	Protein Coding	Q96HJ9	39	GC07P139707	14.4761	https://www.genecards.org/cgi-bin/carddisp.pl?gene=FMC1
HNRNPU	Heterogeneous Nuclear Ribonucleoprotein U	Protein Coding	Q00839	51	GC01M244844	14.4685	https://www.genecards.org/cgi-bin/carddisp.pl?gene=HNRNPU
HLA-DRB1	Major Histocompatibility Complex, Class II, DR Beta 1	Protein Coding	P01911	55	GC06M093834	14.4469	https://www.genecards.org/cgi-bin/carddisp.pl?gene=HLA-DRB1
ATP5MG	ATP Synthase Membrane Subunit G	Protein Coding	O75964	41	GC11P122125	14.437	https://www.genecards.org/cgi-bin/carddisp.pl?gene=ATP5MG
TBK1	TANK Binding Kinase 1	Protein Coding	Q9UHD2	58	GC12P064451	14.4233	https://www.genecards.org/cgi-bin/carddisp.pl?gene=TBK1
BRAF	B-Raf Proto-Oncogene, Serine/Threonine Kinase	Protein Coding	P15056	62	GC07M140773	14.4138	https://www.genecards.org/cgi-bin/carddisp.pl?gene=BRAF
SLC25A37	Solute Carrier Family 25 Member 37	Protein Coding	Q9NYZ2	48	GC08P023528	14.3954	https://www.genecards.org/cgi-bin/carddisp.pl?gene=SLC25A37
GNAS	GNAS Complex Locus	Protein Coding	P84996	59	GC20P058839	14.3903	https://www.genecards.org/cgi-bin/carddisp.pl?gene=GNAS
SLC25A29	Solute Carrier Family 25 Member 29	Protein Coding	Q8N8R3	46	GC14M119833	14.364	https://www.genecards.org/cgi-bin/carddisp.pl?gene=SLC25A29
VWF	Von Willebrand Factor	Protein Coding	P04275	56	GC12M029229	14.3584	https://www.genecards.org/cgi-bin/carddisp.pl?gene=VWF
ABCB8	ATP Binding Cassette Subfamily B Member 8	Protein Coding	Q9NUT2	47	GC07P151028	14.3345	https://www.genecards.org/cgi-bin/carddisp.pl?gene=ABCB8
PTRH2	Peptidyl-TRNA Hydrolase 2	Protein Coding	Q9Y3E5	52	GC17M059674	14.326	https://www.genecards.org/cgi-bin/carddisp.pl?gene=PTRH2
DBT	Dihydrolipoamide Branched Chain Transacylase E2	Protein Coding	P11182	51	GC01M100186	14.3243	https://www.genecards.org/cgi-bin/carddisp.pl?gene=DBT
TBRG4	Transforming Growth Factor Beta Regulator 4	Protein Coding	Q969Z0	41	GC07M045100	14.3174	https://www.genecards.org/cgi-bin/carddisp.pl?gene=TBRG4
MIR27A	MicroRNA 27a	RNA Gene		30	GC19M092209	14.3161	https://www.genecards.org/cgi-bin/carddisp.pl?gene=MIR27A
LOC126862983	CDK7 Strongly-Dependent Group 2 Enhancer GRCh37_chr20:17950167-17951366	Functional Element		5	GC20P017979	14.2912	https://www.genecards.org/cgi-bin/carddisp.pl?gene=LOC126862983
MYO7A	Myosin VIIA	Protein Coding	Q13402	51	GC11P077128	14.2883	https://www.genecards.org/cgi-bin/carddisp.pl?gene=MYO7A
LOC132090059	Neanderthal Introgressed Variant-Containing Enhancer Experimental_25941	Functional Element		7	GC12P134544	14.2783	https://www.genecards.org/cgi-bin/carddisp.pl?gene=LOC132090059
MTFR1L	Mitochondrial Fission Regulator 1 Like	Protein Coding	Q9H019	38	GC01P041875	14.2753	https://www.genecards.org/cgi-bin/carddisp.pl?gene=MTFR1L
METAP1D	Methionyl Aminopeptidase Type 1D, Mitochondrial	Protein Coding	Q6UB28	45	GC02P172000	14.252	https://www.genecards.org/cgi-bin/carddisp.pl?gene=METAP1D
MIR7-3HG	MIR7-3 Host Gene	RNA Gene	Q8N6C7	34	GC19P112015	14.2516	https://www.genecards.org/cgi-bin/carddisp.pl?gene=MIR7-3HG
SLC25A32	Solute Carrier Family 25 Member 32	Protein Coding	Q9H2D1	50	GC08M103398	14.2297	https://www.genecards.org/cgi-bin/carddisp.pl?gene=SLC25A32
LOC129388857	MPRA-Validated Peak3685 Silencer	Functional Element		6	GC02P043957	14.1883	https://www.genecards.org/cgi-bin/carddisp.pl?gene=LOC129388857
PDHB	Pyruvate Dehydrogenase E1 Subunit Beta	Protein Coding	P11177	53	GC03M058451	14.184	https://www.genecards.org/cgi-bin/carddisp.pl?gene=PDHB
FUS	FUS RNA Binding Protein	Protein Coding	P35637	54	GC16P031180	14.1814	https://www.genecards.org/cgi-bin/carddisp.pl?gene=FUS
TERT	Telomerase Reverse Transcriptase	Protein Coding	O14746	60	GC05M001253	14.1669	https://www.genecards.org/cgi-bin/carddisp.pl?gene=TERT
CNTNAP2	Contactin Associated Protein 2	Protein Coding	Q9UHC6	54	GC07P146116	14.1644	https://www.genecards.org/cgi-bin/carddisp.pl?gene=CNTNAP2
MIR146B	MicroRNA 146b	RNA Gene		29	GC10P102436	14.1497	https://www.genecards.org/cgi-bin/carddisp.pl?gene=MIR146B
SLC25A38	Solute Carrier Family 25 Member 38	Protein Coding	Q96DW6	46	GC03P040813	14.1475	https://www.genecards.org/cgi-bin/carddisp.pl?gene=SLC25A38
CD36	CD36 Molecule (CD36 Blood Group)	Protein Coding	P16671	59	GC07P080369	14.1466	https://www.genecards.org/cgi-bin/carddisp.pl?gene=CD36
CKM	Creatine Kinase, M-Type	Protein Coding	P06732	53	GC19M045306	14.1466	https://www.genecards.org/cgi-bin/carddisp.pl?gene=CKM
PC	Pyruvate Carboxylase	Protein Coding	P11498	55	GC11M066848	14.1444	https://www.genecards.org/cgi-bin/carddisp.pl?gene=PC
LOC130058184	ATAC-STARR-Seq Lymphoblastoid Active Region 10237	Functional Element		8	GC16P089154	14.138	https://www.genecards.org/cgi-bin/carddisp.pl?gene=LOC130058184
MAPK14	Mitogen-Activated Protein Kinase 14	Protein Coding	Q16539	60	GC06P134977	14.129	https://www.genecards.org/cgi-bin/carddisp.pl?gene=MAPK14
ACADSB	Acyl-CoA Dehydrogenase Short/Branched Chain	Protein Coding	P45954	52	GC10P123008	14.1155	https://www.genecards.org/cgi-bin/carddisp.pl?gene=ACADSB
GCDH	Glutaryl-CoA Dehydrogenase	Protein Coding	Q92947	54	GC19P012891	14.1005	https://www.genecards.org/cgi-bin/carddisp.pl?gene=GCDH
TXNRD2	Thioredoxin Reductase 2	Protein Coding	Q9NNW7	54	GC22M020053	14.0984	https://www.genecards.org/cgi-bin/carddisp.pl?gene=TXNRD2
GBA1	Glucosylceramidase Beta 1	Protein Coding	P04062	58	GC01M161111	14.0785	https://www.genecards.org/cgi-bin/carddisp.pl?gene=GBA1
PKD1	Polycystin 1, Transient Receptor Potential Channel Interacting	Protein Coding	P98161	54	GC16M020311	14.0652	https://www.genecards.org/cgi-bin/carddisp.pl?gene=PKD1
SMAD5-AS1	SMAD5 Antisense RNA 1	RNA Gene	Q9Y6J3	29	GC05M136129	14.0528	https://www.genecards.org/cgi-bin/carddisp.pl?gene=SMAD5-AS1
ENDOG	Endonuclease G	Protein Coding	Q14249	50	GC09P128818	14.0517	https://www.genecards.org/cgi-bin/carddisp.pl?gene=ENDOG
PRNP	Prion Protein (Kanno Blood Group)	Protein Coding	F7VJQ1	57	GC20P004686	14.0474	https://www.genecards.org/cgi-bin/carddisp.pl?gene=PRNP
CSNK2B	Casein Kinase 2 Beta	Protein Coding	P67870	57	GC06P134823	14.0473	https://www.genecards.org/cgi-bin/carddisp.pl?gene=CSNK2B
LOC130068621	ATAC-STARR-Seq Lymphoblastoid Active Region 29902	Functional Element		5	GC0XP120165	14.0226	https://www.genecards.org/cgi-bin/carddisp.pl?gene=LOC130068621
RTN4IP1	Reticulon 4 Interacting Protein 1	Protein Coding	Q8WWV3	46	GC06M106571	14.0102	https://www.genecards.org/cgi-bin/carddisp.pl?gene=RTN4IP1
MALAT1	Metastasis Associated Lung Adenocarcinoma Transcript 1	RNA Gene		32	GC11P089089	14.0008	https://www.genecards.org/cgi-bin/carddisp.pl?gene=MALAT1
SLC25A27	Solute Carrier Family 25 Member 27	Protein Coding	O95847	46	GC06P046652	14.0007	https://www.genecards.org/cgi-bin/carddisp.pl?gene=SLC25A27
CDKN1A	Cyclin Dependent Kinase Inhibitor 1A	Protein Coding	P38936	58	GC06P134985	13.9916	https://www.genecards.org/cgi-bin/carddisp.pl?gene=CDKN1A
CFAP410	Cilia And Flagella Associated Protein 410	Protein Coding	O43822	44	GC21M044330	13.9845	https://www.genecards.org/cgi-bin/carddisp.pl?gene=CFAP410
PCDH15	Protocadherin Related 15	Protein Coding	Q96QU1	51	GC10M053802	13.9836	https://www.genecards.org/cgi-bin/carddisp.pl?gene=PCDH15
SACS	Sacsin Molecular Chaperone	Protein Coding	Q9NZJ4	46	GC13M023288	13.981	https://www.genecards.org/cgi-bin/carddisp.pl?gene=SACS
ZFYVE26	Zinc Finger FYVE-Type Containing 26	Protein Coding	Q68DK2	47	GC14M067727	13.977	https://www.genecards.org/cgi-bin/carddisp.pl?gene=ZFYVE26
MCAT	Malonyl-CoA-Acyl Carrier Protein Transacylase	Protein Coding	Q8IVS2	46	GC22M043132	13.977	https://www.genecards.org/cgi-bin/carddisp.pl?gene=MCAT
ACAA2	Acetyl-CoA Acyltransferase 2	Protein Coding	P42765	50	GC18M049782	13.9767	https://www.genecards.org/cgi-bin/carddisp.pl?gene=ACAA2
GLS	Glutaminase	Protein Coding	O94925	58	GC02P190880	13.9509	https://www.genecards.org/cgi-bin/carddisp.pl?gene=GLS
MIR140	MicroRNA 140	RNA Gene		31	GC16P083017	13.9425	https://www.genecards.org/cgi-bin/carddisp.pl?gene=MIR140
SCN1A	Sodium Voltage-Gated Channel Alpha Subunit 1	Protein Coding	P35498	56	GC02M165989	13.9315	https://www.genecards.org/cgi-bin/carddisp.pl?gene=SCN1A
GAMT	Guanidinoacetate N-Methyltransferase	Protein Coding	Q14353	55	GC19M001397	13.9198	https://www.genecards.org/cgi-bin/carddisp.pl?gene=GAMT
GPD2	Glycerol-3-Phosphate Dehydrogenase 2	Protein Coding	P43304	55	GC02P156408	13.8963	https://www.genecards.org/cgi-bin/carddisp.pl?gene=GPD2
PDF	Peptide Deformylase, Mitochondrial	Protein Coding	Q9HBH1	38	GC16M073175	13.873	https://www.genecards.org/cgi-bin/carddisp.pl?gene=PDF
CHKB-CPT1B	CHKB-CPT1B Readthrough (NMD Candidate)	RNA Gene		23	GC22M050568	13.8451	https://www.genecards.org/cgi-bin/carddisp.pl?gene=CHKB-CPT1B
LOC126859565	CDK7 Strongly-Dependent Group 2 Enhancer GRCh37_chr6:5368745-5369944	Functional Element		6	GC06P006609	13.8318	https://www.genecards.org/cgi-bin/carddisp.pl?gene=LOC126859565
PDHX	Pyruvate Dehydrogenase Complex Component X	Protein Coding	O00330	53	GC11P034894	13.8093	https://www.genecards.org/cgi-bin/carddisp.pl?gene=PDHX
HTT	Huntingtin	Protein Coding	P42858	53	GC04P003041	13.7882	https://www.genecards.org/cgi-bin/carddisp.pl?gene=HTT
TFRC	Transferrin Receptor	Protein Coding	P02786	59	GC03M196303	13.7865	https://www.genecards.org/cgi-bin/carddisp.pl?gene=TFRC
GSK3B	Glycogen Synthase Kinase 3 Beta	Protein Coding	P49841	59	GC03M119821	13.7552	https://www.genecards.org/cgi-bin/carddisp.pl?gene=GSK3B
APEX1	Apurinic/Apyrimidinic Endodeoxyribonuclease 1	Protein Coding	P27695	54	GC14P020455	13.7462	https://www.genecards.org/cgi-bin/carddisp.pl?gene=APEX1
KIF5B	Kinesin Family Member 5B	Protein Coding	P33176	54	GC10M035758	13.7385	https://www.genecards.org/cgi-bin/carddisp.pl?gene=KIF5B
GPT	Glutamic--Pyruvic Transaminase	Protein Coding	P24298	51	GC08P144502	13.7382	https://www.genecards.org/cgi-bin/carddisp.pl?gene=GPT
USH2A	Usherin	Protein Coding	O75445	47	GC01M215622	13.7353	https://www.genecards.org/cgi-bin/carddisp.pl?gene=USH2A
MTX2	Metaxin 2	Protein Coding	O75431	49	GC02P176269	13.7343	https://www.genecards.org/cgi-bin/carddisp.pl?gene=MTX2
LEP	Leptin	Protein Coding	P41159	55	GC07P128241	13.7339	https://www.genecards.org/cgi-bin/carddisp.pl?gene=LEP
PYURF	PIGY Upstream Open Reading Frame	Protein Coding	Q96I23	35	GC04M088521	13.723	https://www.genecards.org/cgi-bin/carddisp.pl?gene=PYURF
NOS3	Nitric Oxide Synthase 3	Protein Coding	P29474	59	GC07P158097	13.7125	https://www.genecards.org/cgi-bin/carddisp.pl?gene=NOS3
LOC129936729	ATAC-STARR-Seq Lymphoblastoid Silent Region 14349	Functional Element		5	GC03P059338	13.7051	https://www.genecards.org/cgi-bin/carddisp.pl?gene=LOC129936729
FDX1	Ferredoxin 1	Protein Coding	P10109	49	GC11P110429	13.705	https://www.genecards.org/cgi-bin/carddisp.pl?gene=FDX1
SLC8B1	Solute Carrier Family 8 Member B1	Protein Coding	Q6J4K2	44	GC12M113298	13.6959	https://www.genecards.org/cgi-bin/carddisp.pl?gene=SLC8B1
SDHAF4	Succinate Dehydrogenase Complex Assembly Factor 4	Protein Coding	Q5VUM1	39	GC06P070566	13.6914	https://www.genecards.org/cgi-bin/carddisp.pl?gene=SDHAF4
XPNPEP3	X-Prolyl Aminopeptidase 3	Protein Coding	Q9NQH7	50	GC22P040857	13.681	https://www.genecards.org/cgi-bin/carddisp.pl?gene=XPNPEP3
GRIA1	Glutamate Ionotropic Receptor AMPA Type Subunit 1	Protein Coding	P42261	58	GC05P153489	13.6776	https://www.genecards.org/cgi-bin/carddisp.pl?gene=GRIA1
ANK2	Ankyrin 2	Protein Coding	Q01484	50	GC04P112735	13.6533	https://www.genecards.org/cgi-bin/carddisp.pl?gene=ANK2
KMT2A	Lysine Methyltransferase 2A	Protein Coding	Q03164	56	GC11P118436	13.6503	https://www.genecards.org/cgi-bin/carddisp.pl?gene=KMT2A
ATP5MF	ATP Synthase Membrane Subunit F	Protein Coding	P56134	40	GC07M100003	13.6441	https://www.genecards.org/cgi-bin/carddisp.pl?gene=ATP5MF
TOMM20L	Translocase Of Outer Mitochondrial Membrane 20 Like	Protein Coding	Q6UXN7	36	GC14P058395	13.6405	https://www.genecards.org/cgi-bin/carddisp.pl?gene=TOMM20L
MAP1B	Microtubule Associated Protein 1B	Protein Coding	P46821	53	GC05P072107	13.6349	https://www.genecards.org/cgi-bin/carddisp.pl?gene=MAP1B
MAPK8	Mitogen-Activated Protein Kinase 8	Protein Coding	P45983	58	GC10P048306	13.6204	https://www.genecards.org/cgi-bin/carddisp.pl?gene=MAPK8
PITRM1-AS1	PITRM1 Antisense RNA 1	RNA Gene		20	GC10P003141	13.6142	https://www.genecards.org/cgi-bin/carddisp.pl?gene=PITRM1-AS1
GAA	Alpha Glucosidase	Protein Coding	P10253	59	GC17P080101	13.6133	https://www.genecards.org/cgi-bin/carddisp.pl?gene=GAA
GSR	Glutathione-Disulfide Reductase	Protein Coding	P00390	59	GC08M030678	13.6025	https://www.genecards.org/cgi-bin/carddisp.pl?gene=GSR
SLC25A31	Solute Carrier Family 25 Member 31	Protein Coding	Q9H0C2	45	GC04P127730	13.596	https://www.genecards.org/cgi-bin/carddisp.pl?gene=SLC25A31
LOC129932912	ATAC-STARR-Seq Lymphoblastoid Silent Region 2019	Functional Element		5	GC01P244855	13.5894	https://www.genecards.org/cgi-bin/carddisp.pl?gene=LOC129932912
SERPINA1	Serpin Family A Member 1	Protein Coding	P01009	58	GC14M094376	13.5889	https://www.genecards.org/cgi-bin/carddisp.pl?gene=SERPINA1
WFS1	Wolframin ER Transmembrane Glycoprotein	Protein Coding	O76024	54	GC04P006269	13.5808	https://www.genecards.org/cgi-bin/carddisp.pl?gene=WFS1
PRIMPOL	Primase And DNA Directed Polymerase	Protein Coding	Q96LW4	43	GC04P184649	13.5552	https://www.genecards.org/cgi-bin/carddisp.pl?gene=PRIMPOL
DYRK1A	Dual Specificity Tyrosine Phosphorylation Regulated Kinase 1A	Protein Coding	Q13627	59	GC21P037365	13.5552	https://www.genecards.org/cgi-bin/carddisp.pl?gene=DYRK1A
SLC25A28	Solute Carrier Family 25 Member 28	Protein Coding	Q96A46	45	GC10M099610	13.5004	https://www.genecards.org/cgi-bin/carddisp.pl?gene=SLC25A28
SLC19A3	Solute Carrier Family 19 Member 3	Protein Coding	Q9BZV2	54	GC02M227685	13.4816	https://www.genecards.org/cgi-bin/carddisp.pl?gene=SLC19A3
TH	Tyrosine Hydroxylase	Protein Coding	P07101	59	GC11M002163	13.4721	https://www.genecards.org/cgi-bin/carddisp.pl?gene=TH
HMOX1	Heme Oxygenase 1	Protein Coding	P09601	61	GC22P035380	13.4651	https://www.genecards.org/cgi-bin/carddisp.pl?gene=HMOX1
MTFR2	Mitochondrial Fission Regulator 2	Protein Coding	Q6P444	38	GC06M136231	13.439	https://www.genecards.org/cgi-bin/carddisp.pl?gene=MTFR2
NR3C1	Nuclear Receptor Subfamily 3 Group C Member 1	Protein Coding	P04150	58	GC05M143277	13.4122	https://www.genecards.org/cgi-bin/carddisp.pl?gene=NR3C1
PCCA	Propionyl-CoA Carboxylase Subunit Alpha	Protein Coding	P05165	55	GC13P100089	13.3903	https://www.genecards.org/cgi-bin/carddisp.pl?gene=PCCA
LOC130060410	ATAC-STARR-Seq Lymphoblastoid Active Region 11821	Functional Element		4	GC17P118937	13.3797	https://www.genecards.org/cgi-bin/carddisp.pl?gene=LOC130060410
SIRT1	Sirtuin 1	Protein Coding	Q96EB6	58	GC10P067884	13.3432	https://www.genecards.org/cgi-bin/carddisp.pl?gene=SIRT1
TRMT61B	TRNA Methyltransferase 61B	Protein Coding	Q9BVS5	40	GC02M028849	13.3364	https://www.genecards.org/cgi-bin/carddisp.pl?gene=TRMT61B
LOC126806807	BRD4-Independent Group 4 Enhancer GRCh37_chr3:128620937-128622136	Functional Element		6	GC03P139341	13.3148	https://www.genecards.org/cgi-bin/carddisp.pl?gene=LOC126806807
MIR212	MicroRNA 212	RNA Gene		27	GC17M002050	13.2801	https://www.genecards.org/cgi-bin/carddisp.pl?gene=MIR212
CDK5RAP1	CDK5 Regulatory Subunit Associated Protein 1	Protein Coding	Q96SZ6	44	GC20M033358	13.2281	https://www.genecards.org/cgi-bin/carddisp.pl?gene=CDK5RAP1
LOC130004506	ATAC-STARR-Seq Lymphoblastoid Active Region 3872	Functional Element		8	GC10P111725	13.2186	https://www.genecards.org/cgi-bin/carddisp.pl?gene=LOC130004506
TCF4	Transcription Factor 4	Protein Coding	P15884	56	GC18M055222	13.2137	https://www.genecards.org/cgi-bin/carddisp.pl?gene=TCF4
CAT	Catalase	Protein Coding	P04040	60	GC11P034460	13.1866	https://www.genecards.org/cgi-bin/carddisp.pl?gene=CAT
NBAS	NBAS Subunit Of NRZ Tethering Complex	Protein Coding	A2RRP1	48	GC02M014798	13.1757	https://www.genecards.org/cgi-bin/carddisp.pl?gene=NBAS
AR	Androgen Receptor	Protein Coding	P10275	60	GC0XP067544	13.1752	https://www.genecards.org/cgi-bin/carddisp.pl?gene=AR
LDLR	Low Density Lipoprotein Receptor	Protein Coding	P01130	60	GC19P112317	13.1722	https://www.genecards.org/cgi-bin/carddisp.pl?gene=LDLR
ABCB1	ATP Binding Cassette Subfamily B Member 1	Protein Coding	P08183	60	GC07M087504	13.1587	https://www.genecards.org/cgi-bin/carddisp.pl?gene=ABCB1
COX7C	Cytochrome C Oxidase Subunit 7C	Protein Coding	P15954	40	GC05P086617	13.1537	https://www.genecards.org/cgi-bin/carddisp.pl?gene=COX7C
KAT14	Lysine Acetyltransferase 14	Protein Coding	Q9H8E8	42	GC20P018184	13.1532	https://www.genecards.org/cgi-bin/carddisp.pl?gene=KAT14
NOTCH3	Notch Receptor 3	Protein Coding	Q9UM47	60	GC19M015159	13.1358	https://www.genecards.org/cgi-bin/carddisp.pl?gene=NOTCH3
PPARA	Peroxisome Proliferator Activated Receptor Alpha	Protein Coding	Q07869	53	GC22P046150	13.1317	https://www.genecards.org/cgi-bin/carddisp.pl?gene=PPARA
NDUFA7	NADH:Ubiquinone Oxidoreductase Subunit A7	Protein Coding	O95182	45	GC19M008308	13.1279	https://www.genecards.org/cgi-bin/carddisp.pl?gene=NDUFA7
ABCD1	ATP Binding Cassette Subfamily D Member 1	Protein Coding	P33897	54	GC0XP153724	13.0875	https://www.genecards.org/cgi-bin/carddisp.pl?gene=ABCD1
TMLHE	Trimethyllysine Hydroxylase, Epsilon	Protein Coding	Q9NVH6	50	GC0XM155489	13.0845	https://www.genecards.org/cgi-bin/carddisp.pl?gene=TMLHE
TNFRSF1A	TNF Receptor Superfamily Member 1A	Protein Coding	P19438	59	GC12M006328	13.0488	https://www.genecards.org/cgi-bin/carddisp.pl?gene=TNFRSF1A
COX18	Cytochrome C Oxidase Assembly Factor COX18	Protein Coding	Q8N8Q8	43	GC04M073054	13.0477	https://www.genecards.org/cgi-bin/carddisp.pl?gene=COX18
MIR132	MicroRNA 132	RNA Gene		29	GC17M002049	13.045	https://www.genecards.org/cgi-bin/carddisp.pl?gene=MIR132
ALDH5A1	Aldehyde Dehydrogenase 5 Family Member A1	Protein Coding	P51649	56	GC06P024494	13.0374	https://www.genecards.org/cgi-bin/carddisp.pl?gene=ALDH5A1
ME2	Malic Enzyme 2	Protein Coding	P23368	53	GC18P050879	13.0179	https://www.genecards.org/cgi-bin/carddisp.pl?gene=ME2
ASXL1	ASXL Transcriptional Regulator 1	Protein Coding	Q8IXJ9	53	GC20P040700	13.0145	https://www.genecards.org/cgi-bin/carddisp.pl?gene=ASXL1
HSPA4	Heat Shock Protein Family A (Hsp70) Member 4	Protein Coding	P34932	52	GC05P133062	13.0043	https://www.genecards.org/cgi-bin/carddisp.pl?gene=HSPA4
SQOR	Sulfide Quinone Oxidoreductase	Protein Coding	Q9Y6N5	48	GC15P157247	13.0039	https://www.genecards.org/cgi-bin/carddisp.pl?gene=SQOR
CREB1	CAMP Responsive Element Binding Protein 1	Protein Coding	P16220	59	GC02P207529	12.9833	https://www.genecards.org/cgi-bin/carddisp.pl?gene=CREB1
TSC1	TSC Complex Subunit 1	Protein Coding	Q92574	56	GC09M132891	12.9697	https://www.genecards.org/cgi-bin/carddisp.pl?gene=TSC1
GPAT2	Glycerol-3-Phosphate Acyltransferase 2, Mitochondrial	Protein Coding	Q6NUI2	40	GC02M100836	12.9607	https://www.genecards.org/cgi-bin/carddisp.pl?gene=GPAT2
PLD6	Phospholipase D Family Member 6	Protein Coding	Q8N2A8	41	GC17M075692	12.9577	https://www.genecards.org/cgi-bin/carddisp.pl?gene=PLD6
PLA2G6	Phospholipase A2 Group VI	Protein Coding	O60733	55	GC22M078732	12.9483	https://www.genecards.org/cgi-bin/carddisp.pl?gene=PLA2G6
CFH	Complement Factor H	Protein Coding	P08603	56	GC01P196621	12.9419	https://www.genecards.org/cgi-bin/carddisp.pl?gene=CFH
CACNA1A	Calcium Voltage-Gated Channel Subunit Alpha1 A	Protein Coding	O00555	57	GC19M013206	12.9418	https://www.genecards.org/cgi-bin/carddisp.pl?gene=CACNA1A
PDSS2	Decaprenyl Diphosphate Synthase Subunit 2	Protein Coding	Q86YH6	50	GC06M107152	12.9394	https://www.genecards.org/cgi-bin/carddisp.pl?gene=PDSS2
EHMT1	Euchromatic Histone Lysine Methyltransferase 1	Protein Coding	Q9H9B1	54	GC09P137618	12.9289	https://www.genecards.org/cgi-bin/carddisp.pl?gene=EHMT1
SLC25A51	Solute Carrier Family 25 Member 51	Protein Coding	Q9H1U9	39	GC09M042848	12.9249	https://www.genecards.org/cgi-bin/carddisp.pl?gene=SLC25A51
PISD	Phosphatidylserine Decarboxylase	Protein Coding	Q9UG56	50	GC22M076979	12.9172	https://www.genecards.org/cgi-bin/carddisp.pl?gene=PISD
GUF1	GTP Binding Elongation Factor GUF1	Protein Coding	Q8N442	46	GC04P044719	12.9163	https://www.genecards.org/cgi-bin/carddisp.pl?gene=GUF1
CUL3	Cullin 3	Protein Coding	Q13618	57	GC02M224470	12.9101	https://www.genecards.org/cgi-bin/carddisp.pl?gene=CUL3
CYP3A4	Cytochrome P450 Family 3 Subfamily A Member 4	Protein Coding	P08684	56	GC07M100029	12.908	https://www.genecards.org/cgi-bin/carddisp.pl?gene=CYP3A4
CHD8	Chromodomain Helicase DNA Binding Protein 8	Protein Coding	Q9HCK8	52	GC14M021385	12.9047	https://www.genecards.org/cgi-bin/carddisp.pl?gene=CHD8
MIR106B	MicroRNA 106b	RNA Gene		29	GC07M105256	12.9007	https://www.genecards.org/cgi-bin/carddisp.pl?gene=MIR106B
IDH3A	Isocitrate Dehydrogenase (NAD(+)) 3 Catalytic Subunit Alpha	Protein Coding	P50213	52	GC15P078131	12.9001	https://www.genecards.org/cgi-bin/carddisp.pl?gene=IDH3A
SHC1	SHC Adaptor Protein 1	Protein Coding	P29353	53	GC01M154962	12.8967	https://www.genecards.org/cgi-bin/carddisp.pl?gene=SHC1
HFE	Homeostatic Iron Regulator	Protein Coding	Q30201	54	GC06P026087	12.8895	https://www.genecards.org/cgi-bin/carddisp.pl?gene=HFE
MIR93	MicroRNA 93	RNA Gene		28	GC07M105252	12.8796	https://www.genecards.org/cgi-bin/carddisp.pl?gene=MIR93
PRODH	Proline Dehydrogenase 1	Protein Coding	O43272	54	GC22M018912	12.8727	https://www.genecards.org/cgi-bin/carddisp.pl?gene=PRODH
FGF21	Fibroblast Growth Factor 21	Protein Coding	Q9NSA1	48	GC19P113390	12.85	https://www.genecards.org/cgi-bin/carddisp.pl?gene=FGF21
CYP2D6	Cytochrome P450 Family 2 Subfamily D Member 6	Protein Coding	P10635	56	GC22M042126	12.8379	https://www.genecards.org/cgi-bin/carddisp.pl?gene=CYP2D6
CYP2C19	Cytochrome P450 Family 2 Subfamily C Member 19	Protein Coding	P33261	53	GC10P094762	12.8365	https://www.genecards.org/cgi-bin/carddisp.pl?gene=CYP2C19
SLC6A4	Solute Carrier Family 6 Member 4	Protein Coding	P31645	57	GC17M030194	12.833	https://www.genecards.org/cgi-bin/carddisp.pl?gene=SLC6A4
ALAS2	5'-Aminolevulinate Synthase 2	Protein Coding	P22557	54	GC0XM055009	12.8163	https://www.genecards.org/cgi-bin/carddisp.pl?gene=ALAS2
PRDX3	Peroxiredoxin 3	Protein Coding	P30048	51	GC10M119167	12.8082	https://www.genecards.org/cgi-bin/carddisp.pl?gene=PRDX3
KMT2C	Lysine Methyltransferase 2C	Protein Coding	Q8NEZ4	52	GC07M152134	12.8033	https://www.genecards.org/cgi-bin/carddisp.pl?gene=KMT2C
RAD51	RAD51 Recombinase	Protein Coding	Q06609	59	GC15P040694	12.7993	https://www.genecards.org/cgi-bin/carddisp.pl?gene=RAD51
SMDT1	Single-Pass Membrane Protein With Aspartate Rich Tail 1	Protein Coding	Q9H4I9	36	GC22P042079	12.7941	https://www.genecards.org/cgi-bin/carddisp.pl?gene=SMDT1
ATP13A2	ATPase Cation Transporting 13A2	Protein Coding	Q9NQ11	53	GC01M016985	12.794	https://www.genecards.org/cgi-bin/carddisp.pl?gene=ATP13A2
COX7A2L	Cytochrome C Oxidase Subunit 7A2 Like	Protein Coding	O14548	46	GC02M042312	12.7858	https://www.genecards.org/cgi-bin/carddisp.pl?gene=COX7A2L
EGFR	Epidermal Growth Factor Receptor	Protein Coding	P00533	63	GC07P055019	12.7727	https://www.genecards.org/cgi-bin/carddisp.pl?gene=EGFR
NFE2L2	NFE2 Like BZIP Transcription Factor 2	Protein Coding	Q16236	60	GC02M177227	12.7701	https://www.genecards.org/cgi-bin/carddisp.pl?gene=NFE2L2
MCL1	MCL1 Apoptosis Regulator, BCL2 Family Member	Protein Coding	Q07820	56	GC01M160760	12.7689	https://www.genecards.org/cgi-bin/carddisp.pl?gene=MCL1
SPAST	Spastin	Protein Coding	Q9UBP0	51	GC02P032063	12.7672	https://www.genecards.org/cgi-bin/carddisp.pl?gene=SPAST
ICAM1	Intercellular Adhesion Molecule 1	Protein Coding	P05362	59	GC19P112296	12.7352	https://www.genecards.org/cgi-bin/carddisp.pl?gene=ICAM1
GADD45GIP1	GADD45G Interacting Protein 1	Protein Coding	Q8TAE8	40	GC19M012953	12.6945	https://www.genecards.org/cgi-bin/carddisp.pl?gene=GADD45GIP1
NNT	Nicotinamide Nucleotide Transhydrogenase	Protein Coding	Q13423	51	GC05P043602	12.6723	https://www.genecards.org/cgi-bin/carddisp.pl?gene=NNT
RHOT2	Ras Homolog Family Member T2	Protein Coding	Q8IXI1	47	GC16P080170	12.6541	https://www.genecards.org/cgi-bin/carddisp.pl?gene=RHOT2
KRAS	KRAS Proto-Oncogene, GTPase	Protein Coding	P01116	61	GC12M029682	12.6534	https://www.genecards.org/cgi-bin/carddisp.pl?gene=KRAS
XDH	Xanthine Dehydrogenase	Protein Coding	P47989	56	GC02M031334	12.6288	https://www.genecards.org/cgi-bin/carddisp.pl?gene=XDH
IGF1R	Insulin Like Growth Factor 1 Receptor	Protein Coding	P08069	63	GC15P098648	12.6248	https://www.genecards.org/cgi-bin/carddisp.pl?gene=IGF1R
JAK2	Janus Kinase 2	Protein Coding	O60674	62	GC09P004985	12.6236	https://www.genecards.org/cgi-bin/carddisp.pl?gene=JAK2
LPL	Lipoprotein Lipase	Protein Coding	P06858	59	GC08P019901	12.6216	https://www.genecards.org/cgi-bin/carddisp.pl?gene=LPL
CYP11B2	Cytochrome P450 Family 11 Subfamily B Member 2	Protein Coding	P19099	55	GC08M142910	12.6042	https://www.genecards.org/cgi-bin/carddisp.pl?gene=CYP11B2
STAT1	Signal Transducer And Activator Of Transcription 1	Protein Coding	P42224	61	GC02M190908	12.6031	https://www.genecards.org/cgi-bin/carddisp.pl?gene=STAT1
CA5A	Carbonic Anhydrase 5A	Protein Coding	P35218	50	GC16M087882	12.5954	https://www.genecards.org/cgi-bin/carddisp.pl?gene=CA5A
MIR15B	MicroRNA 15b	RNA Gene		27	GC03P160404	12.5924	https://www.genecards.org/cgi-bin/carddisp.pl?gene=MIR15B
HSPA8	Heat Shock Protein Family A (Hsp70) Member 8	Protein Coding	P11142	58	GC11M123057	12.5631	https://www.genecards.org/cgi-bin/carddisp.pl?gene=HSPA8
PPA2	Inorganic Pyrophosphatase 2	Protein Coding	Q9H2U2	47	GC04M105369	12.558	https://www.genecards.org/cgi-bin/carddisp.pl?gene=PPA2
LOC130059156	ATAC-STARR-Seq Lymphoblastoid Silent Region 7560	Functional Element		5	GC16P094164	12.5382	https://www.genecards.org/cgi-bin/carddisp.pl?gene=LOC130059156
SMC3	Structural Maintenance Of Chromosomes 3	Protein Coding	Q9UQE7	55	GC10P110567	12.5346	https://www.genecards.org/cgi-bin/carddisp.pl?gene=SMC3
TNNI3	Troponin I3, Cardiac Type	Protein Coding	P19429	57	GC19M055151	12.5326	https://www.genecards.org/cgi-bin/carddisp.pl?gene=TNNI3
MPV17L	MPV17 Mitochondrial Inner Membrane Protein Like	Protein Coding	Q2QL34	39	GC16P080795	12.5319	https://www.genecards.org/cgi-bin/carddisp.pl?gene=MPV17L
CYP27B1	Cytochrome P450 Family 27 Subfamily B Member 1	Protein Coding	O15528	55	GC12M059355	12.5212	https://www.genecards.org/cgi-bin/carddisp.pl?gene=CYP27B1
SLC26A4	Solute Carrier Family 26 Member 4	Protein Coding	O43511	52	GC07P107660	12.5197	https://www.genecards.org/cgi-bin/carddisp.pl?gene=SLC26A4
HBB	Hemoglobin Subunit Beta	Protein Coding	P68871	54	GC11M012029	12.5169	https://www.genecards.org/cgi-bin/carddisp.pl?gene=HBB
APOOL	Apolipoprotein O Like	Protein Coding	Q6UXV4	40	GC0XP085003	12.4848	https://www.genecards.org/cgi-bin/carddisp.pl?gene=APOOL
GRN	Granulin Precursor	Protein Coding	P28799	56	GC17P044345	12.4746	https://www.genecards.org/cgi-bin/carddisp.pl?gene=GRN
LOC129936731	ATAC-STARR-Seq Lymphoblastoid Silent Region 14351	Functional Element		5	GC03P059340	12.468	https://www.genecards.org/cgi-bin/carddisp.pl?gene=LOC129936731
RPL10	Ribosomal Protein L10	Protein Coding	P27635	52	GC0XP154389	12.4666	https://www.genecards.org/cgi-bin/carddisp.pl?gene=RPL10
BNIP3	BCL2 Interacting Protein 3	Protein Coding	Q12983	49	GC10M131966	12.4608	https://www.genecards.org/cgi-bin/carddisp.pl?gene=BNIP3
IL2	Interleukin 2	Protein Coding	P60568	55	GC04M122451	12.4501	https://www.genecards.org/cgi-bin/carddisp.pl?gene=IL2
VPS13B	Vacuolar Protein Sorting 13 Homolog B	Protein Coding	Q7Z7G8	50	GC08P099049	12.4385	https://www.genecards.org/cgi-bin/carddisp.pl?gene=VPS13B
PIGY	Phosphatidylinositol Glycan Anchor Biosynthesis Class Y	Protein Coding	Q3MUY2	42	GC04M088520	12.4378	https://www.genecards.org/cgi-bin/carddisp.pl?gene=PIGY
COX19	Cytochrome C Oxidase Assembly Factor COX19	Protein Coding	Q49B96	39	GC07M000898	12.4365	https://www.genecards.org/cgi-bin/carddisp.pl?gene=COX19
DNMT1	DNA Methyltransferase 1	Protein Coding	P26358	61	GC19M010133	12.4297	https://www.genecards.org/cgi-bin/carddisp.pl?gene=DNMT1
SLC22A5	Solute Carrier Family 22 Member 5	Protein Coding	O76082	55	GC05P132369	12.4059	https://www.genecards.org/cgi-bin/carddisp.pl?gene=SLC22A5
MARCHF5	Membrane Associated Ring-CH-Type Finger 5	Protein Coding	Q9NX47	44	GC10P109434	12.4058	https://www.genecards.org/cgi-bin/carddisp.pl?gene=MARCHF5
PRKCD	Protein Kinase C Delta	Protein Coding	Q05655	60	GC03P053156	12.3961	https://www.genecards.org/cgi-bin/carddisp.pl?gene=PRKCD
KCNQ1	Potassium Voltage-Gated Channel Subfamily Q Member 1	Protein Coding	P51787	58	GC11P002444	12.3889	https://www.genecards.org/cgi-bin/carddisp.pl?gene=KCNQ1
MAOB	Monoamine Oxidase B	Protein Coding	P27338	53	GC0XM043766	12.3518	https://www.genecards.org/cgi-bin/carddisp.pl?gene=MAOB
MIR320A	MicroRNA 320a	RNA Gene		29	GC08M022306	12.3494	https://www.genecards.org/cgi-bin/carddisp.pl?gene=MIR320A
DSP	Desmoplakin	Protein Coding	P15924	59	GC06P007541	12.3402	https://www.genecards.org/cgi-bin/carddisp.pl?gene=DSP
OPTN	Optineurin	Protein Coding	Q96CV9	53	GC10P013099	12.2826	https://www.genecards.org/cgi-bin/carddisp.pl?gene=OPTN
SYNE1	Spectrin Repeat Containing Nuclear Envelope Protein 1	Protein Coding	Q8NF91	50	GC06M152121	12.2818	https://www.genecards.org/cgi-bin/carddisp.pl?gene=SYNE1
FOXP3	Forkhead Box P3	Protein Coding	Q9BZS1	56	GC0XM049250	12.2763	https://www.genecards.org/cgi-bin/carddisp.pl?gene=FOXP3
NPPB	Natriuretic Peptide B	Protein Coding	P16860	52	GC01M014525	12.2661	https://www.genecards.org/cgi-bin/carddisp.pl?gene=NPPB
NOS2	Nitric Oxide Synthase 2	Protein Coding	P35228	58	GC17M027756	12.2591	https://www.genecards.org/cgi-bin/carddisp.pl?gene=NOS2
BCL11B	BCL11 Transcription Factor B	Protein Coding	Q9C0K0	52	GC14M099169	12.2503	https://www.genecards.org/cgi-bin/carddisp.pl?gene=BCL11B
CHCHD6	Coiled-Coil-Helix-Coiled-Coil-Helix Domain Containing 6	Protein Coding	Q9BRQ6	40	GC03P126704	12.2433	https://www.genecards.org/cgi-bin/carddisp.pl?gene=CHCHD6
COX7A1	Cytochrome C Oxidase Subunit 7A1	Protein Coding	P24310	41	GC19M093647	12.2253	https://www.genecards.org/cgi-bin/carddisp.pl?gene=COX7A1
NLRX1	NLR Family Member X1	Protein Coding	Q86UT6	45	GC11P119166	12.2193	https://www.genecards.org/cgi-bin/carddisp.pl?gene=NLRX1
CYP11B1	Cytochrome P450 Family 11 Subfamily B Member 1	Protein Coding	P15538	54	GC08M142872	12.2104	https://www.genecards.org/cgi-bin/carddisp.pl?gene=CYP11B1
SYNJ2BP-COX16	SYNJ2BP-COX16 Readthrough	Protein Coding		18	GC14M070325	12.2094	https://www.genecards.org/cgi-bin/carddisp.pl?gene=SYNJ2BP-COX16
RERE	Arginine-Glutamic Acid Dipeptide Repeats	Protein Coding	Q9P2R6	51	GC01M014433	12.2048	https://www.genecards.org/cgi-bin/carddisp.pl?gene=RERE
NPPA	Natriuretic Peptide A	Protein Coding	P01160	53	GC01M014524	12.2026	https://www.genecards.org/cgi-bin/carddisp.pl?gene=NPPA
LOC130064279	ATAC-STARR-Seq Lymphoblastoid Active Region 14513	Functional Element		4	GC19P119582	12.1979	https://www.genecards.org/cgi-bin/carddisp.pl?gene=LOC130064279
NBEA	Neurobeachin	Protein Coding	Q8NFP9	50	GC13P034942	12.1968	https://www.genecards.org/cgi-bin/carddisp.pl?gene=NBEA
MYC	MYC Proto-Oncogene, BHLH Transcription Factor	Protein Coding	P01106	61	GC08P127735	12.1946	https://www.genecards.org/cgi-bin/carddisp.pl?gene=MYC
TMEM11	Transmembrane Protein 11	Protein Coding	P17152	44	GC17M021197	12.1887	https://www.genecards.org/cgi-bin/carddisp.pl?gene=TMEM11
ABCB6	ATP Binding Cassette Subfamily B Member 6 (LAN Blood Group)	Protein Coding	Q9NP58	53	GC02M219209	12.1877	https://www.genecards.org/cgi-bin/carddisp.pl?gene=ABCB6
TLR4	Toll Like Receptor 4	Protein Coding	O00206	60	GC09P117704	12.1749	https://www.genecards.org/cgi-bin/carddisp.pl?gene=TLR4
RPS27A	Ribosomal Protein S27a	Protein Coding	P62979	52	GC02P055231	12.1698	https://www.genecards.org/cgi-bin/carddisp.pl?gene=RPS27A
TACR3	Tachykinin Receptor 3	Protein Coding	P29371	58	GC04M103586	12.1536	https://www.genecards.org/cgi-bin/carddisp.pl?gene=TACR3
ARID1B	AT-Rich Interaction Domain 1B	Protein Coding	Q8NFD5	52	GC06P156777	12.1521	https://www.genecards.org/cgi-bin/carddisp.pl?gene=ARID1B
CXCL8	C-X-C Motif Chemokine Ligand 8	Protein Coding	P10145	53	GC04P073740	12.1489	https://www.genecards.org/cgi-bin/carddisp.pl?gene=CXCL8
MYBPC3	Myosin Binding Protein C3	Protein Coding	Q14896	55	GC11M125005	12.1465	https://www.genecards.org/cgi-bin/carddisp.pl?gene=MYBPC3
SLC2A1	Solute Carrier Family 2 Member 1	Protein Coding	P11166	62	GC01M042925	12.1457	https://www.genecards.org/cgi-bin/carddisp.pl?gene=SLC2A1
PIK3CG	Phosphatidylinositol-4,5-Bisphosphate 3-Kinase Catalytic Subunit Gamma	Protein Coding	P48736	58	GC07P106865	12.1431	https://www.genecards.org/cgi-bin/carddisp.pl?gene=PIK3CG
JUN	Jun Proto-Oncogene, AP-1 Transcription Factor Subunit	Protein Coding	P05412	58	GC01M058780	12.1336	https://www.genecards.org/cgi-bin/carddisp.pl?gene=JUN
ATXN2	Ataxin 2	Protein Coding	Q99700	53	GC12M111443	12.126	https://www.genecards.org/cgi-bin/carddisp.pl?gene=ATXN2
APTX	Aprataxin	Protein Coding	Q7Z2E3	53	GC09M032886	12.1239	https://www.genecards.org/cgi-bin/carddisp.pl?gene=APTX
FOXO1	Forkhead Box O1	Protein Coding	Q12778	60	GC13M040555	12.1131	https://www.genecards.org/cgi-bin/carddisp.pl?gene=FOXO1
NDUFC1	NADH:Ubiquinone Oxidoreductase Subunit C1	Protein Coding	O43677	43	GC04M139279	12.1096	https://www.genecards.org/cgi-bin/carddisp.pl?gene=NDUFC1
PRELID1	PRELI Domain Containing 1	Protein Coding	Q9Y255	46	GC05P186646	12.1067	https://www.genecards.org/cgi-bin/carddisp.pl?gene=PRELID1
POMC	Proopiomelanocortin	Protein Coding	P01189	56	GC02M025160	12.106	https://www.genecards.org/cgi-bin/carddisp.pl?gene=POMC
NLRP3	NLR Family Pyrin Domain Containing 3	Protein Coding	Q96P20	57	GC01P247416	12.0861	https://www.genecards.org/cgi-bin/carddisp.pl?gene=NLRP3
CYP24A1	Cytochrome P450 Family 24 Subfamily A Member 1	Protein Coding	Q07973	55	GC20M054153	12.0752	https://www.genecards.org/cgi-bin/carddisp.pl?gene=CYP24A1
RAC1	Rac Family Small GTPase 1	Protein Coding	P63000	58	GC07P011586	12.0663	https://www.genecards.org/cgi-bin/carddisp.pl?gene=RAC1
SLC25A39	Solute Carrier Family 25 Member 39	Protein Coding	Q9BZJ4	44	GC17M044319	12.0566	https://www.genecards.org/cgi-bin/carddisp.pl?gene=SLC25A39
TTR	Transthyretin	Protein Coding	P02766	57	GC18P031557	12.0564	https://www.genecards.org/cgi-bin/carddisp.pl?gene=TTR
SIRT5	Sirtuin 5	Protein Coding	Q9NXA8	47	GC06P013574	12.0477	https://www.genecards.org/cgi-bin/carddisp.pl?gene=SIRT5
FASLG	Fas Ligand	Protein Coding	P48023	57	GC01P172659	12.0422	https://www.genecards.org/cgi-bin/carddisp.pl?gene=FASLG
MIX23	Mitochondrial Matrix Import Factor 23	Protein Coding	Q4VC31	39	GC03M122361	12.0293	https://www.genecards.org/cgi-bin/carddisp.pl?gene=MIX23
CD4	CD4 Molecule	Protein Coding	P01730	59	GC12P006786	12.0291	https://www.genecards.org/cgi-bin/carddisp.pl?gene=CD4
MIR23A	MicroRNA 23a	RNA Gene		28	GC19M092210	12.0216	https://www.genecards.org/cgi-bin/carddisp.pl?gene=MIR23A
MEN1	Menin 1	Protein Coding	O00255	54	GC11M064803	12.0177	https://www.genecards.org/cgi-bin/carddisp.pl?gene=MEN1
GDF15	Growth Differentiation Factor 15	Protein Coding	Q99988	52	GC19P112633	12.0083	https://www.genecards.org/cgi-bin/carddisp.pl?gene=GDF15
ACAD8	Acyl-CoA Dehydrogenase Family Member 8	Protein Coding	Q9UKU7	51	GC11P134253	11.9851	https://www.genecards.org/cgi-bin/carddisp.pl?gene=ACAD8
COX6C	Cytochrome C Oxidase Subunit 6C	Protein Coding	P09669	44	GC08M099899	11.9715	https://www.genecards.org/cgi-bin/carddisp.pl?gene=COX6C
HNF1A	HNF1 Homeobox A	Protein Coding	P20823	55	GC12P120978	11.9591	https://www.genecards.org/cgi-bin/carddisp.pl?gene=HNF1A
SRC	SRC Proto-Oncogene, Non-Receptor Tyrosine Kinase	Protein Coding	P12931	60	GC20P037344	11.9581	https://www.genecards.org/cgi-bin/carddisp.pl?gene=SRC
HSPE1	Heat Shock Protein Family E (Hsp10) Member 1	Protein Coding	P61604	51	GC02P197501	11.9487	https://www.genecards.org/cgi-bin/carddisp.pl?gene=HSPE1
NDUFA4L2	NDUFA4 Mitochondrial Complex Associated Like 2	Protein Coding	Q9NRX3	39	GC12M057234	11.9368	https://www.genecards.org/cgi-bin/carddisp.pl?gene=NDUFA4L2
COA7	Cytochrome C Oxidase Assembly Factor 7	Protein Coding	Q96BR5	43	GC01M052684	11.9322	https://www.genecards.org/cgi-bin/carddisp.pl?gene=COA7
TNRC6B	Trinucleotide Repeat Containing Adaptor 6B	Protein Coding	Q9UPQ9	48	GC22P040044	11.912	https://www.genecards.org/cgi-bin/carddisp.pl?gene=TNRC6B
MTRR	5-Methyltetrahydrofolate-Homocysteine Methyltransferase Reductase	Protein Coding	Q9UBK8	53	GC05P007851	11.8878	https://www.genecards.org/cgi-bin/carddisp.pl?gene=MTRR
LACTB	Lactamase Beta	Protein Coding	P83111	47	GC15P159154	11.8875	https://www.genecards.org/cgi-bin/carddisp.pl?gene=LACTB
SLC25A33	Solute Carrier Family 25 Member 33	Protein Coding	Q9BSK2	43	GC01P009539	11.8808	https://www.genecards.org/cgi-bin/carddisp.pl?gene=SLC25A33
PEX6	Peroxisomal Biogenesis Factor 6	Protein Coding	Q13608	50	GC06M042963	11.8754	https://www.genecards.org/cgi-bin/carddisp.pl?gene=PEX6
C9orf72	C9orf72-SMCR8 Complex Subunit	Protein Coding	Q96LT7	49	GC09M029601	11.872	https://www.genecards.org/cgi-bin/carddisp.pl?gene=C9orf72
ASXL3	ASXL Transcriptional Regulator 3	Protein Coding	Q9C0F0	43	GC18P033578	11.8534	https://www.genecards.org/cgi-bin/carddisp.pl?gene=ASXL3
FOXO3	Forkhead Box O3	Protein Coding	O43524	56	GC06P108559	11.8336	https://www.genecards.org/cgi-bin/carddisp.pl?gene=FOXO3
MIR15A	MicroRNA 15a	RNA Gene		23	GC13M050049	11.8262	https://www.genecards.org/cgi-bin/carddisp.pl?gene=MIR15A
SHH	Sonic Hedgehog Signaling Molecule	Protein Coding	Q15465	59	GC07M155799	11.8211	https://www.genecards.org/cgi-bin/carddisp.pl?gene=SHH
CD44	CD44 Molecule (IN Blood Group)	Protein Coding	P16070	57	GC11P035139	11.8162	https://www.genecards.org/cgi-bin/carddisp.pl?gene=CD44
SETD1A	SET Domain Containing 1A, Histone Lysine Methyltransferase	Protein Coding	O15047	51	GC16P081676	11.8161	https://www.genecards.org/cgi-bin/carddisp.pl?gene=SETD1A
CUBN	Cubilin	Protein Coding	O60494	54	GC10M016824	11.8104	https://www.genecards.org/cgi-bin/carddisp.pl?gene=CUBN
SPG11	SPG11 Vesicle Trafficking Associated, Spatacsin	Protein Coding	Q96JI7	49	GC15M044834	11.8002	https://www.genecards.org/cgi-bin/carddisp.pl?gene=SPG11
CTSD	Cathepsin D	Protein Coding	P07339	61	GC11M001752	11.7672	https://www.genecards.org/cgi-bin/carddisp.pl?gene=CTSD
IDH3B	Isocitrate Dehydrogenase (NAD(+)) 3 Non-Catalytic Subunit Beta	Protein Coding	O43837	51	GC20M002658	11.7664	https://www.genecards.org/cgi-bin/carddisp.pl?gene=IDH3B
BAD	BCL2 Associated Agonist Of Cell Death	Protein Coding	Q92934	53	GC11M125317	11.7643	https://www.genecards.org/cgi-bin/carddisp.pl?gene=BAD
VPS13C	Vacuolar Protein Sorting 13 Homolog C	Protein Coding	Q709C8	43	GC15M061852	11.7375	https://www.genecards.org/cgi-bin/carddisp.pl?gene=VPS13C
LOC129936730	ATAC-STARR-Seq Lymphoblastoid Silent Region 14350	Functional Element		5	GC03P059339	11.7338	https://www.genecards.org/cgi-bin/carddisp.pl?gene=LOC129936730
NPHP4	Nephrocystin 4	Protein Coding	O75161	50	GC01M014304	11.7296	https://www.genecards.org/cgi-bin/carddisp.pl?gene=NPHP4
REN	Renin	Protein Coding	P00797	58	GC01M204154	11.7219	https://www.genecards.org/cgi-bin/carddisp.pl?gene=REN
NR2F1	Nuclear Receptor Subfamily 2 Group F Member 1	Protein Coding	P10589	52	GC05P093583	11.7206	https://www.genecards.org/cgi-bin/carddisp.pl?gene=NR2F1
HOTAIR	HOX Transcript Antisense RNA	RNA Gene		31	GC12M053962	11.7192	https://www.genecards.org/cgi-bin/carddisp.pl?gene=HOTAIR
TCAIM	T Cell Activation Inhibitor, Mitochondrial	Protein Coding	Q8N3R3	32	GC03P044343	11.7113	https://www.genecards.org/cgi-bin/carddisp.pl?gene=TCAIM
DES	Desmin	Protein Coding	P17661	56	GC02P219418	11.7105	https://www.genecards.org/cgi-bin/carddisp.pl?gene=DES
MAPK3	Mitogen-Activated Protein Kinase 3	Protein Coding	P27361	58	GC16M044057	11.7092	https://www.genecards.org/cgi-bin/carddisp.pl?gene=MAPK3
TUG1	Taurine Up-Regulated 1	Protein Coding	A0A6I8PU40	32	GC22P030969	11.7086	https://www.genecards.org/cgi-bin/carddisp.pl?gene=TUG1
WWOX	WW Domain Containing Oxidoreductase	Protein Coding	Q9NZC7	54	GC16P078099	11.687	https://www.genecards.org/cgi-bin/carddisp.pl?gene=WWOX
RIMS1	Regulating Synaptic Membrane Exocytosis 1	Protein Coding	Q86UR5	50	GC06P071886	11.681	https://www.genecards.org/cgi-bin/carddisp.pl?gene=RIMS1
CCND1	Cyclin D1	Protein Coding	P24385	62	GC11P069641	11.68	https://www.genecards.org/cgi-bin/carddisp.pl?gene=CCND1
TSHR	Thyroid Stimulating Hormone Receptor	Protein Coding	P16473	56	GC14P080954	11.6743	https://www.genecards.org/cgi-bin/carddisp.pl?gene=TSHR
LOC130064074	ATAC-STARR-Seq Lymphoblastoid Active Region 14360	Functional Element		5	GC19P119377	11.673	https://www.genecards.org/cgi-bin/carddisp.pl?gene=LOC130064074
CREBBP	CREB Binding Protein	Protein Coding	Q92793	62	GC16M020489	11.6724	https://www.genecards.org/cgi-bin/carddisp.pl?gene=CREBBP
SETD5	SET Domain Containing 5	Protein Coding	Q9C0A6	46	GC03P009539	11.6677	https://www.genecards.org/cgi-bin/carddisp.pl?gene=SETD5
MRS2	Magnesium Transporter MRS2	Protein Coding	Q9HD23	47	GC06P024402	11.6534	https://www.genecards.org/cgi-bin/carddisp.pl?gene=MRS2
DNAJC11	DnaJ Heat Shock Protein Family (Hsp40) Member C11	Protein Coding	Q9NVH1	45	GC01M006634	11.6518	https://www.genecards.org/cgi-bin/carddisp.pl?gene=DNAJC11
OSGEPL1	O-Sialoglycoprotein Endopeptidase Like 1	Protein Coding	Q9H4B0	44	GC02M189746	11.6479	https://www.genecards.org/cgi-bin/carddisp.pl?gene=OSGEPL1
GLRX2	Glutaredoxin 2	Protein Coding	Q9NS18	46	GC01M193065	11.6413	https://www.genecards.org/cgi-bin/carddisp.pl?gene=GLRX2
DEAF1	DEAF1 Transcription Factor	Protein Coding	O75398	49	GC11M000644	11.6366	https://www.genecards.org/cgi-bin/carddisp.pl?gene=DEAF1
ADIPOQ	Adiponectin, C1Q And Collagen Domain Containing	Protein Coding	Q15848	55	GC03P186842	11.6095	https://www.genecards.org/cgi-bin/carddisp.pl?gene=ADIPOQ
DMAC2L	Distal Membrane Arm Assembly Component 2 Like	Protein Coding	Q99766	40	GC14P050694	11.6093	https://www.genecards.org/cgi-bin/carddisp.pl?gene=DMAC2L
RUNX1	RUNX Family Transcription Factor 1	Protein Coding	Q01196	59	GC21M034787	11.6026	https://www.genecards.org/cgi-bin/carddisp.pl?gene=RUNX1
EDN1	Endothelin 1	Protein Coding	P05305	58	GC06P012236	11.5967	https://www.genecards.org/cgi-bin/carddisp.pl?gene=EDN1
MIURF	Mitochondrial Elongation Factor 1 Upstream Open Reading Frame	Protein Coding		8	GC22P074774	11.5913	https://www.genecards.org/cgi-bin/carddisp.pl?gene=MIURF
GFAP	Glial Fibrillary Acidic Protein	Protein Coding	P14136	57	GC17M077883	11.5897	https://www.genecards.org/cgi-bin/carddisp.pl?gene=GFAP
COQ3	Coenzyme Q3, Methyltransferase	Protein Coding	Q9NZJ6	46	GC06M099369	11.5826	https://www.genecards.org/cgi-bin/carddisp.pl?gene=COQ3
XIST	X Inactive Specific Transcript	RNA Gene		31	GC0XM073820	11.5711	https://www.genecards.org/cgi-bin/carddisp.pl?gene=XIST
NOA1	Nitric Oxide Associated 1	Protein Coding	Q8NC60	43	GC04M056963	11.5691	https://www.genecards.org/cgi-bin/carddisp.pl?gene=NOA1
ALAS1	5'-Aminolevulinate Synthase 1	Protein Coding	P13196	51	GC03P052198	11.5599	https://www.genecards.org/cgi-bin/carddisp.pl?gene=ALAS1
CRP	C-Reactive Protein	Protein Coding	P02741	54	GC01M161311	11.5391	https://www.genecards.org/cgi-bin/carddisp.pl?gene=CRP
PEX5	Peroxisomal Biogenesis Factor 5	Protein Coding	P50542	52	GC12P039004	11.5377	https://www.genecards.org/cgi-bin/carddisp.pl?gene=PEX5
SERPINE1	Serpin Family E Member 1	Protein Coding	P05121	59	GC07P101127	11.5215	https://www.genecards.org/cgi-bin/carddisp.pl?gene=SERPINE1
NOTCH1	Notch Receptor 1	Protein Coding	P46531	61	GC09M138715	11.5127	https://www.genecards.org/cgi-bin/carddisp.pl?gene=NOTCH1
MDM2	MDM2 Proto-Oncogene	Protein Coding	Q00987	62	GC12P068808	11.5069	https://www.genecards.org/cgi-bin/carddisp.pl?gene=MDM2
USH1C	USH1 Protein Network Component Harmonin	Protein Coding	Q9Y6N9	50	GC11M017950	11.506	https://www.genecards.org/cgi-bin/carddisp.pl?gene=USH1C
TANC2	Tetratricopeptide Repeat, Ankyrin Repeat And Coiled-Coil Containing 2	Protein Coding	Q9HCD6	45	GC17P112850	11.4973	https://www.genecards.org/cgi-bin/carddisp.pl?gene=TANC2
MTNAP1	Mitochondrial Nucleoid Associated Protein 1	Protein Coding	Q9BSJ5	39	GC17P073232	11.4828	https://www.genecards.org/cgi-bin/carddisp.pl?gene=MTNAP1
SP1	Sp1 Transcription Factor	Protein Coding	P08047	55	GC12P053380	11.481	https://www.genecards.org/cgi-bin/carddisp.pl?gene=SP1
KGD4	Alpha-Ketoglutarate Dehydrogenase Subunit 4	Protein Coding	P82909	35	GC05P078024	11.4701	https://www.genecards.org/cgi-bin/carddisp.pl?gene=KGD4
MTX1	Metaxin 1	Protein Coding	Q13505	45	GC01P155208	11.4685	https://www.genecards.org/cgi-bin/carddisp.pl?gene=MTX1
CHEK2	Checkpoint Kinase 2	Protein Coding	O96017	63	GC22M028687	11.4611	https://www.genecards.org/cgi-bin/carddisp.pl?gene=CHEK2
IL4	Interleukin 4	Protein Coding	P05112	55	GC05P132673	11.4582	https://www.genecards.org/cgi-bin/carddisp.pl?gene=IL4
TCF20	Transcription Factor 20	Protein Coding	Q9UGU0	47	GC22M042160	11.4504	https://www.genecards.org/cgi-bin/carddisp.pl?gene=TCF20
SLC25A16	Solute Carrier Family 25 Member 16	Protein Coding	P16260	44	GC10M068477	11.4499	https://www.genecards.org/cgi-bin/carddisp.pl?gene=SLC25A16
MMAA	Metabolism Of Cobalamin Associated A	Protein Coding	Q8IVH4	47	GC04P145637	11.4393	https://www.genecards.org/cgi-bin/carddisp.pl?gene=MMAA
NOS1	Nitric Oxide Synthase 1	Protein Coding	P29475	58	GC12M117208	11.4328	https://www.genecards.org/cgi-bin/carddisp.pl?gene=NOS1
NDUFB1	NADH:Ubiquinone Oxidoreductase Subunit B1	Protein Coding	O75438	40	GC14M092116	11.4306	https://www.genecards.org/cgi-bin/carddisp.pl?gene=NDUFB1
HNF4A	Hepatocyte Nuclear Factor 4 Alpha	Protein Coding	P41235	58	GC20P044355	11.43	https://www.genecards.org/cgi-bin/carddisp.pl?gene=HNF4A
TRIO	Trio Rho Guanine Nucleotide Exchange Factor	Protein Coding	O75962	53	GC05P014143	11.4218	https://www.genecards.org/cgi-bin/carddisp.pl?gene=TRIO
DMAC1	Distal Membrane Arm Assembly Component 1	Protein Coding	Q96GE9	40	GC09M007798	11.4139	https://www.genecards.org/cgi-bin/carddisp.pl?gene=DMAC1
PRDX5	Peroxiredoxin 5	Protein Coding	P30044	53	GC11P088959	11.4007	https://www.genecards.org/cgi-bin/carddisp.pl?gene=PRDX5
ADNP	Activity Dependent Neuroprotector Homeobox	Protein Coding	Q9H2P0	52	GC20M050888	11.3866	https://www.genecards.org/cgi-bin/carddisp.pl?gene=ADNP
PRKCA	Protein Kinase C Alpha	Protein Coding	P17252	59	GC17P066302	11.3802	https://www.genecards.org/cgi-bin/carddisp.pl?gene=PRKCA
GSTP1	Glutathione S-Transferase Pi 1	Protein Coding	P09211	59	GC11P067583	11.3758	https://www.genecards.org/cgi-bin/carddisp.pl?gene=GSTP1
HK2	Hexokinase 2	Protein Coding	P52789	55	GC02P074947	11.3708	https://www.genecards.org/cgi-bin/carddisp.pl?gene=HK2
SIRT4	Sirtuin 4	Protein Coding	Q9Y6E7	46	GC12P120291	11.3505	https://www.genecards.org/cgi-bin/carddisp.pl?gene=SIRT4
OGG1	8-Oxoguanine DNA Glycosylase	Protein Coding	O15527	56	GC03P021488	11.3435	https://www.genecards.org/cgi-bin/carddisp.pl?gene=OGG1
CHD2	Chromodomain Helicase DNA Binding Protein 2	Protein Coding	O14647	53	GC15P158323	11.3421	https://www.genecards.org/cgi-bin/carddisp.pl?gene=CHD2
PALB2	Partner And Localizer Of BRCA2	Protein Coding	Q86YC2	53	GC16M023603	11.3406	https://www.genecards.org/cgi-bin/carddisp.pl?gene=PALB2
TMEM65	Transmembrane Protein 65	Protein Coding	Q6PI78	39	GC08M124346	11.3359	https://www.genecards.org/cgi-bin/carddisp.pl?gene=TMEM65
MAIP1	Matrix AAA Peptidase Interacting Protein 1	Protein Coding	Q8WWC4	38	GC02P199956	11.3341	https://www.genecards.org/cgi-bin/carddisp.pl?gene=MAIP1
DRD2	Dopamine Receptor D2	Protein Coding	P14416	58	GC11M113409	11.3257	https://www.genecards.org/cgi-bin/carddisp.pl?gene=DRD2
CLN3	CLN3 Lysosomal/Endosomal Transmembrane Protein, Battenin	Protein Coding	Q13286	53	GC16M028466	11.2967	https://www.genecards.org/cgi-bin/carddisp.pl?gene=CLN3
PEX1	Peroxisomal Biogenesis Factor 1	Protein Coding	O43933	53	GC07M092487	11.2952	https://www.genecards.org/cgi-bin/carddisp.pl?gene=PEX1
NGF	Nerve Growth Factor	Protein Coding	P01138	60	GC01M115285	11.2948	https://www.genecards.org/cgi-bin/carddisp.pl?gene=NGF
MIR9-1	MicroRNA 9-1	RNA Gene		27	GC01M156420	11.2922	https://www.genecards.org/cgi-bin/carddisp.pl?gene=MIR9-1
SLC34A1	Solute Carrier Family 34 Member 1	Protein Coding	Q06495	53	GC05P186655	11.2831	https://www.genecards.org/cgi-bin/carddisp.pl?gene=SLC34A1
PEX16	Peroxisomal Biogenesis Factor 16	Protein Coding	Q9Y5Y5	47	GC11M124946	11.2704	https://www.genecards.org/cgi-bin/carddisp.pl?gene=PEX16
HRAS	HRas Proto-Oncogene, GTPase	Protein Coding	P01112	61	GC11M011817	11.2607	https://www.genecards.org/cgi-bin/carddisp.pl?gene=HRAS
PPT1	Palmitoyl-Protein Thioesterase 1	Protein Coding	P50897	56	GC01M040199	11.2409	https://www.genecards.org/cgi-bin/carddisp.pl?gene=PPT1
PKD2	Polycystin 2, Transient Receptor Potential Cation Channel	Protein Coding	Q13563	57	GC04P088007	11.2409	https://www.genecards.org/cgi-bin/carddisp.pl?gene=PKD2
KDM6A	Lysine Demethylase 6A	Protein Coding	O15550	56	GC0XP044873	11.2294	https://www.genecards.org/cgi-bin/carddisp.pl?gene=KDM6A
ADA	Adenosine Deaminase	Protein Coding	P00813	60	GC20M044620	11.2111	https://www.genecards.org/cgi-bin/carddisp.pl?gene=ADA
LIPT1	Lipoyltransferase 1	Protein Coding	Q9Y234	49	GC02P099235	11.21	https://www.genecards.org/cgi-bin/carddisp.pl?gene=LIPT1
LOC129998603	ATAC-STARR-Seq Lymphoblastoid Active Region 26127	Functional Element		8	GC07P087511	11.1864	https://www.genecards.org/cgi-bin/carddisp.pl?gene=LOC129998603
TRUB2	TruB Pseudouridine Synthase Family Member 2	Protein Coding	O95900	41	GC09M129314	11.1821	https://www.genecards.org/cgi-bin/carddisp.pl?gene=TRUB2
SLC17A5	Solute Carrier Family 17 Member 5	Protein Coding	Q9NRA2	54	GC06M073593	11.1763	https://www.genecards.org/cgi-bin/carddisp.pl?gene=SLC17A5
CCL2	C-C Motif Chemokine Ligand 2	Protein Coding	P13500	58	GC17P034255	11.1706	https://www.genecards.org/cgi-bin/carddisp.pl?gene=CCL2
BCL2L11	BCL2 Like 11	Protein Coding	O43521	53	GC02P111119	11.1599	https://www.genecards.org/cgi-bin/carddisp.pl?gene=BCL2L11
AIP	Aryl Hydrocarbon Receptor Interacting Protein	Protein Coding	O00170	51	GC11P067468	11.1578	https://www.genecards.org/cgi-bin/carddisp.pl?gene=AIP
HLA-B	Major Histocompatibility Complex, Class I, B	Protein Coding	P01889	54	GC06M093738	11.1518	https://www.genecards.org/cgi-bin/carddisp.pl?gene=HLA-B
FBN1	Fibrillin 1	Protein Coding	P35555	56	GC15M048408	11.1504	https://www.genecards.org/cgi-bin/carddisp.pl?gene=FBN1
RAD51C	RAD51 Paralog C	Protein Coding	O43502	52	GC17P058692	11.1492	https://www.genecards.org/cgi-bin/carddisp.pl?gene=RAD51C
PRKACA	Protein Kinase CAMP-Activated Catalytic Subunit Alpha	Protein Coding	P17612	61	GC19M092217	11.1445	https://www.genecards.org/cgi-bin/carddisp.pl?gene=PRKACA
SPEN	Spen Family Transcriptional Repressor	Protein Coding	Q96T58	49	GC01P040837	11.137	https://www.genecards.org/cgi-bin/carddisp.pl?gene=SPEN
RPE65	Retinoid Isomerohydrolase RPE65	Protein Coding	Q16518	53	GC01M068428	11.137	https://www.genecards.org/cgi-bin/carddisp.pl?gene=RPE65
LINC02605	Long Intergenic Non-Protein Coding RNA 2605	RNA Gene		18	GC08P078838	11.137	https://www.genecards.org/cgi-bin/carddisp.pl?gene=LINC02605
CDC42BPB	CDC42 Binding Protein Kinase Beta	Protein Coding	Q9Y5S2	51	GC14M102932	11.1364	https://www.genecards.org/cgi-bin/carddisp.pl?gene=CDC42BPB
MTR	5-Methyltetrahydrofolate-Homocysteine Methyltransferase	Protein Coding	Q99707	56	GC01P236795	11.1317	https://www.genecards.org/cgi-bin/carddisp.pl?gene=MTR
TPP1	Tripeptidyl Peptidase 1	Protein Coding	O14773	54	GC11M012130	11.1275	https://www.genecards.org/cgi-bin/carddisp.pl?gene=TPP1
MUC1	Mucin 1, Cell Surface Associated	Protein Coding	P15941	56	GC01M155185	11.12	https://www.genecards.org/cgi-bin/carddisp.pl?gene=MUC1
DDHD1	DDHD Domain Containing 1	Protein Coding	Q8NEL9	47	GC14M053036	11.1131	https://www.genecards.org/cgi-bin/carddisp.pl?gene=DDHD1
CRAT	Carnitine O-Acetyltransferase	Protein Coding	P43155	53	GC09M129094	11.0819	https://www.genecards.org/cgi-bin/carddisp.pl?gene=CRAT
CACNA1C	Calcium Voltage-Gated Channel Subunit Alpha1 C	Protein Coding	Q13936	58	GC12P001970	11.0802	https://www.genecards.org/cgi-bin/carddisp.pl?gene=CACNA1C
PYGM	Glycogen Phosphorylase, Muscle Associated	Protein Coding	P11217	55	GC11M064746	11.0798	https://www.genecards.org/cgi-bin/carddisp.pl?gene=PYGM
ASXL2	ASXL Transcriptional Regulator 2	Protein Coding	Q76L83	47	GC02M025733	11.0607	https://www.genecards.org/cgi-bin/carddisp.pl?gene=ASXL2
TTN-AS1	TTN Antisense RNA 1	RNA Gene		25	GC02P178521	11.0573	https://www.genecards.org/cgi-bin/carddisp.pl?gene=TTN-AS1
MBD5	Methyl-CpG Binding Domain Protein 5	Protein Coding	Q9P267	47	GC02P148021	11.0551	https://www.genecards.org/cgi-bin/carddisp.pl?gene=MBD5
LBHD1	LBH Domain Containing 1	Protein Coding	Q9BQE6	32	GC11M125245	11.0539	https://www.genecards.org/cgi-bin/carddisp.pl?gene=LBHD1
TNFSF10	TNF Superfamily Member 10	Protein Coding	P50591	53	GC03M172505	11.0525	https://www.genecards.org/cgi-bin/carddisp.pl?gene=TNFSF10
WT1	WT1 Transcription Factor	Protein Coding	P19544	56	GC11M032365	11.05	https://www.genecards.org/cgi-bin/carddisp.pl?gene=WT1
KIF5A	Kinesin Family Member 5A	Protein Coding	Q12840	54	GC12P060685	11.05	https://www.genecards.org/cgi-bin/carddisp.pl?gene=KIF5A
RNF135	Ring Finger Protein 135	Protein Coding	Q8IUD6	49	GC17P030958	11.047	https://www.genecards.org/cgi-bin/carddisp.pl?gene=RNF135
HTR2A	5-Hydroxytryptamine Receptor 2A	Protein Coding	P28223	56	GC13M046831	11.0446	https://www.genecards.org/cgi-bin/carddisp.pl?gene=HTR2A
PRL	Prolactin	Protein Coding	P01236	53	GC06M022287	11.0429	https://www.genecards.org/cgi-bin/carddisp.pl?gene=PRL
SLC25A47	Solute Carrier Family 25 Member 47	Protein Coding	Q6Q0C1	39	GC14P100323	11.0412	https://www.genecards.org/cgi-bin/carddisp.pl?gene=SLC25A47
STING1	Stimulator Of Interferon Response CGAMP Interactor 1	Protein Coding	Q86WV6	50	GC05M139492	11.0311	https://www.genecards.org/cgi-bin/carddisp.pl?gene=STING1
SHANK2	SH3 And Multiple Ankyrin Repeat Domains 2	Protein Coding	Q9UPX8	51	GC11M070467	11.029	https://www.genecards.org/cgi-bin/carddisp.pl?gene=SHANK2
CMC1	C-X9-C Motif Containing 1	Protein Coding	Q7Z7K0	38	GC03P028286	11.0269	https://www.genecards.org/cgi-bin/carddisp.pl?gene=CMC1
APOB	Apolipoprotein B	Protein Coding	P04114	55	GC02M020956	11.0196	https://www.genecards.org/cgi-bin/carddisp.pl?gene=APOB
PTCD2	Pentatricopeptide Repeat Domain 2	Protein Coding	Q8WV60	41	GC05P072320	11.0103	https://www.genecards.org/cgi-bin/carddisp.pl?gene=PTCD2
APRT	Adenine Phosphoribosyltransferase	Protein Coding	P07741	55	GC16M088810	10.9999	https://www.genecards.org/cgi-bin/carddisp.pl?gene=APRT
MCCD1	Mitochondrial Coiled-Coil Domain 1	Protein Coding	P59942	33	GC06P031528	10.9928	https://www.genecards.org/cgi-bin/carddisp.pl?gene=MCCD1
RNASEH2B	Ribonuclease H2 Subunit B	Protein Coding	Q5TBB1	46	GC13P050909	10.9923	https://www.genecards.org/cgi-bin/carddisp.pl?gene=RNASEH2B
DISC1	DISC1 Scaffold Protein	Protein Coding	Q9NRI5	52	GC01P231626	10.9858	https://www.genecards.org/cgi-bin/carddisp.pl?gene=DISC1
CYB5R3	Cytochrome B5 Reductase 3	Protein Coding	P00387	54	GC22M077135	10.9826	https://www.genecards.org/cgi-bin/carddisp.pl?gene=CYB5R3
TRAPPC9	Trafficking Protein Particle Complex Subunit 9	Protein Coding	Q96Q05	48	GC08M139728	10.9549	https://www.genecards.org/cgi-bin/carddisp.pl?gene=TRAPPC9
ITPR1	Inositol 1,4,5-Trisphosphate Receptor Type 1	Protein Coding	Q14643	58	GC03P004486	10.9448	https://www.genecards.org/cgi-bin/carddisp.pl?gene=ITPR1
INF2	Inverted Formin 2	Protein Coding	Q27J81	50	GC14P115824	10.9421	https://www.genecards.org/cgi-bin/carddisp.pl?gene=INF2
FADD	Fas Associated Via Death Domain	Protein Coding	Q13158	54	GC11P070203	10.9385	https://www.genecards.org/cgi-bin/carddisp.pl?gene=FADD
ATXN3	Ataxin 3	Protein Coding	P54252	55	GC14M119747	10.9353	https://www.genecards.org/cgi-bin/carddisp.pl?gene=ATXN3
TOP2B	DNA Topoisomerase II Beta	Protein Coding	Q02880	53	GC03M026405	10.9304	https://www.genecards.org/cgi-bin/carddisp.pl?gene=TOP2B
BCKDHA	Branched Chain Keto Acid Dehydrogenase E1 Subunit Alpha	Protein Coding	P12694	51	GC19P113120	10.9285	https://www.genecards.org/cgi-bin/carddisp.pl?gene=BCKDHA
POU3F4	POU Class 3 Homeobox 4	Protein Coding	P49335	46	GC0XP083508	10.9159	https://www.genecards.org/cgi-bin/carddisp.pl?gene=POU3F4
SETX	Senataxin	Protein Coding	Q7Z333	51	GC09M132261	10.9098	https://www.genecards.org/cgi-bin/carddisp.pl?gene=SETX
FLNC	Filamin C	Protein Coding	Q14315	54	GC07P128830	10.907	https://www.genecards.org/cgi-bin/carddisp.pl?gene=FLNC
LOC130066573	ATAC-STARR-Seq Lymphoblastoid Active Region 18384	Functional Element		7	GC21P033916	10.8917	https://www.genecards.org/cgi-bin/carddisp.pl?gene=LOC130066573
OAT	Ornithine Aminotransferase	Protein Coding	P04181	56	GC10M124397	10.8824	https://www.genecards.org/cgi-bin/carddisp.pl?gene=OAT
POLDIP2	DNA Polymerase Delta Interacting Protein 2	Protein Coding	Q9Y2S7	44	GC17M028346	10.8669	https://www.genecards.org/cgi-bin/carddisp.pl?gene=POLDIP2
TXN	Thioredoxin	Protein Coding	P10599	55	GC09M110243	10.8616	https://www.genecards.org/cgi-bin/carddisp.pl?gene=TXN
ATP7B	ATPase Copper Transporting Beta	Protein Coding	P35670	56	GC13M051930	10.8611	https://www.genecards.org/cgi-bin/carddisp.pl?gene=ATP7B
MIR125A	MicroRNA 125a	RNA Gene		29	GC19P113552	10.8596	https://www.genecards.org/cgi-bin/carddisp.pl?gene=MIR125A
SMPD1	Sphingomyelin Phosphodiesterase 1	Protein Coding	P17405	57	GC11P006390	10.8539	https://www.genecards.org/cgi-bin/carddisp.pl?gene=SMPD1
NDUFB5	NADH:Ubiquinone Oxidoreductase Subunit B5	Protein Coding	O43674	39	GC03P179604	10.8462	https://www.genecards.org/cgi-bin/carddisp.pl?gene=NDUFB5
SFXN2	Sideroflexin 2	Protein Coding	Q96NB2	45	GC10P102714	10.8446	https://www.genecards.org/cgi-bin/carddisp.pl?gene=SFXN2
FGFR1	Fibroblast Growth Factor Receptor 1	Protein Coding	P11362	63	GC08M038400	10.8427	https://www.genecards.org/cgi-bin/carddisp.pl?gene=FGFR1
ERCC2	ERCC Excision Repair 2, TFIIH Core Complex Helicase Subunit	Protein Coding	P18074	56	GC19M045349	10.8333	https://www.genecards.org/cgi-bin/carddisp.pl?gene=ERCC2
GHITM	Growth Hormone Inducible Transmembrane Protein	Protein Coding	Q9H3K2	45	GC10P084139	10.8295	https://www.genecards.org/cgi-bin/carddisp.pl?gene=GHITM
SLC25A18	Solute Carrier Family 25 Member 18	Protein Coding	Q9H1K4	45	GC22P069858	10.8194	https://www.genecards.org/cgi-bin/carddisp.pl?gene=SLC25A18
PBX1	PBX Homeobox 1	Protein Coding	P40424	57	GC01P165730	10.8133	https://www.genecards.org/cgi-bin/carddisp.pl?gene=PBX1
GAPDH	Glyceraldehyde-3-Phosphate Dehydrogenase	Protein Coding	P04406	59	GC12P038965	10.8131	https://www.genecards.org/cgi-bin/carddisp.pl?gene=GAPDH
SLC30A9	Solute Carrier Family 30 Member 9	Protein Coding	Q6PML9	50	GC04P041992	10.8105	https://www.genecards.org/cgi-bin/carddisp.pl?gene=SLC30A9
ROMO1	Reactive Oxygen Species Modulator 1	Protein Coding	P60602	40	GC20P035699	10.8027	https://www.genecards.org/cgi-bin/carddisp.pl?gene=ROMO1
SMAD4	SMAD Family Member 4	Protein Coding	Q13485	61	GC18P051028	10.8014	https://www.genecards.org/cgi-bin/carddisp.pl?gene=SMAD4
DELE1	DAP3 Binding Cell Death Enhancer 1	Protein Coding	Q14154	40	GC05P152520	10.7873	https://www.genecards.org/cgi-bin/carddisp.pl?gene=DELE1
HSD17B4	Hydroxysteroid 17-Beta Dehydrogenase 4	Protein Coding	P51659	55	GC05P119452	10.7742	https://www.genecards.org/cgi-bin/carddisp.pl?gene=HSD17B4
ALDH18A1	Aldehyde Dehydrogenase 18 Family Member A1	Protein Coding	P54886	54	GC10M095605	10.7719	https://www.genecards.org/cgi-bin/carddisp.pl?gene=ALDH18A1
ATAD3B	ATPase Family AAA Domain Containing 3B	Protein Coding	Q5T9A4	44	GC01P020488	10.7708	https://www.genecards.org/cgi-bin/carddisp.pl?gene=ATAD3B
BOLA1	BolA Family Member 1	Protein Coding	Q9Y3E2	43	GC01P164205	10.7654	https://www.genecards.org/cgi-bin/carddisp.pl?gene=BOLA1
LOC130001967	ATAC-STARR-Seq Lymphoblastoid Active Region 28514	Functional Element		5	GC09P086288	10.7635	https://www.genecards.org/cgi-bin/carddisp.pl?gene=LOC130001967
GABPA	GA Binding Protein Transcription Factor Subunit Alpha	Protein Coding	Q06546	44	GC21P025734	10.7578	https://www.genecards.org/cgi-bin/carddisp.pl?gene=GABPA
PRPS1	Phosphoribosyl Pyrophosphate Synthetase 1	Protein Coding	P60891	56	GC0XP107628	10.7504	https://www.genecards.org/cgi-bin/carddisp.pl?gene=PRPS1
LCK	LCK Proto-Oncogene, Src Family Tyrosine Kinase	Protein Coding	P06239	60	GC01P032251	10.7425	https://www.genecards.org/cgi-bin/carddisp.pl?gene=LCK
ABCA4	ATP Binding Cassette Subfamily A Member 4	Protein Coding	P78363	53	GC01M093992	10.7406	https://www.genecards.org/cgi-bin/carddisp.pl?gene=ABCA4
AASS	Aminoadipate-Semialdehyde Synthase	Protein Coding	Q9UDR5	50	GC07M122073	10.7373	https://www.genecards.org/cgi-bin/carddisp.pl?gene=AASS
ADAR	Adenosine Deaminase RNA Specific	Protein Coding	P55265	54	GC01M160957	10.7312	https://www.genecards.org/cgi-bin/carddisp.pl?gene=ADAR
PNKD	PNKD Metallo-Beta-Lactamase Domain Containing	Protein Coding	Q8N490	50	GC02P218270	10.7245	https://www.genecards.org/cgi-bin/carddisp.pl?gene=PNKD
ABCB11	ATP Binding Cassette Subfamily B Member 11	Protein Coding	O95342	55	GC02M168922	10.718	https://www.genecards.org/cgi-bin/carddisp.pl?gene=ABCB11
ZAP70	Zeta Chain Of T Cell Receptor Associated Protein Kinase 70	Protein Coding	P43403	59	GC02P097943	10.7085	https://www.genecards.org/cgi-bin/carddisp.pl?gene=ZAP70
AUH	AU RNA Binding Methylglutaconyl-CoA Hydratase	Protein Coding	Q13825	50	GC09M091213	10.6916	https://www.genecards.org/cgi-bin/carddisp.pl?gene=AUH
CHMP2B	Charged Multivesicular Body Protein 2B	Protein Coding	Q9UQN3	53	GC03P087227	10.6671	https://www.genecards.org/cgi-bin/carddisp.pl?gene=CHMP2B
CXCR4	C-X-C Motif Chemokine Receptor 4	Protein Coding	P61073	61	GC02M136114	10.6661	https://www.genecards.org/cgi-bin/carddisp.pl?gene=CXCR4
ATAD1	ATPase Family AAA Domain Containing 1	Protein Coding	Q8NBU5	48	GC10M087751	10.6658	https://www.genecards.org/cgi-bin/carddisp.pl?gene=ATAD1
GCH1	GTP Cyclohydrolase 1	Protein Coding	P30793	56	GC14M054842	10.6546	https://www.genecards.org/cgi-bin/carddisp.pl?gene=GCH1
IQSEC2	IQ Motif And Sec7 Domain ArfGEF 2	Protein Coding	Q5JU85	48	GC0XM053225	10.6519	https://www.genecards.org/cgi-bin/carddisp.pl?gene=IQSEC2
PSEN2	Presenilin 2	Protein Coding	P49810	58	GC01P226870	10.6384	https://www.genecards.org/cgi-bin/carddisp.pl?gene=PSEN2
PDK1	Pyruvate Dehydrogenase Kinase 1	Protein Coding	Q15118	55	GC02P172555	10.6343	https://www.genecards.org/cgi-bin/carddisp.pl?gene=PDK1
VHL	Von Hippel-Lindau Tumor Suppressor	Protein Coding	P40337	56	GC03P021526	10.6341	https://www.genecards.org/cgi-bin/carddisp.pl?gene=VHL
ACAD11	Acyl-CoA Dehydrogenase Family Member 11	Protein Coding	Q709F0	43	GC03M132559	10.634	https://www.genecards.org/cgi-bin/carddisp.pl?gene=ACAD11
CDK13	Cyclin Dependent Kinase 13	Protein Coding	Q14004	52	GC07P039950	10.6302	https://www.genecards.org/cgi-bin/carddisp.pl?gene=CDK13
CLU	Clusterin	Protein Coding	P10909	56	GC08M027596	10.6298	https://www.genecards.org/cgi-bin/carddisp.pl?gene=CLU
DNAJA3	DnaJ Heat Shock Protein Family (Hsp40) Member A3	Protein Coding	Q96EY1	46	GC16P004425	10.629	https://www.genecards.org/cgi-bin/carddisp.pl?gene=DNAJA3
MYH11	Myosin Heavy Chain 11	Protein Coding	P35749	55	GC16M020946	10.6156	https://www.genecards.org/cgi-bin/carddisp.pl?gene=MYH11
MIR106A	MicroRNA 106a	RNA Gene		26	GC0XM134463	10.615	https://www.genecards.org/cgi-bin/carddisp.pl?gene=MIR106A
LOC130009747	ATAC-STARR-Seq Lymphoblastoid Active Region 7719	Functional Element		2	GC13P048014	10.614	https://www.genecards.org/cgi-bin/carddisp.pl?gene=LOC130009747
MYH9	Myosin Heavy Chain 9	Protein Coding	P35579	56	GC22M036281	10.6133	https://www.genecards.org/cgi-bin/carddisp.pl?gene=MYH9
CASP2	Caspase 2	Protein Coding	P42575	55	GC07P157914	10.5957	https://www.genecards.org/cgi-bin/carddisp.pl?gene=CASP2
CLN8	CLN8 Transmembrane ER And ERGIC Protein	Protein Coding	Q9UBY8	50	GC08P001755	10.5751	https://www.genecards.org/cgi-bin/carddisp.pl?gene=CLN8
PPOX	Protoporphyrinogen Oxidase	Protein Coding	P50336	52	GC01P164874	10.5708	https://www.genecards.org/cgi-bin/carddisp.pl?gene=PPOX
SLC25A17	Solute Carrier Family 25 Member 17	Protein Coding	O43808	46	GC22M077122	10.5655	https://www.genecards.org/cgi-bin/carddisp.pl?gene=SLC25A17
DLST	Dihydrolipoamide S-Succinyltransferase	Protein Coding	P36957	55	GC14P074881	10.5603	https://www.genecards.org/cgi-bin/carddisp.pl?gene=DLST
PKHD1	PKHD1 Ciliary IPT Domain Containing Fibrocystin/Polyductin	Protein Coding	P08F94	47	GC06M094108	10.5447	https://www.genecards.org/cgi-bin/carddisp.pl?gene=PKHD1
KAT6A	Lysine Acetyltransferase 6A	Protein Coding	Q92794	54	GC08M041929	10.5377	https://www.genecards.org/cgi-bin/carddisp.pl?gene=KAT6A
GRIN2A	Glutamate Ionotropic Receptor NMDA Type Subunit 2A	Protein Coding	Q12879	60	GC16M009753	10.5345	https://www.genecards.org/cgi-bin/carddisp.pl?gene=GRIN2A
MIR181D	MicroRNA 181d	RNA Gene		26	GC19P013874	10.5343	https://www.genecards.org/cgi-bin/carddisp.pl?gene=MIR181D
MIR148B	MicroRNA 148b	RNA Gene		28	GC12P054337	10.532	https://www.genecards.org/cgi-bin/carddisp.pl?gene=MIR148B
NFKB2	Nuclear Factor Kappa B Subunit 2	Protein Coding	Q00653	60	GC10P102394	10.5317	https://www.genecards.org/cgi-bin/carddisp.pl?gene=NFKB2
CYP2E1	Cytochrome P450 Family 2 Subfamily E Member 1	Protein Coding	P05181	55	GC10P133520	10.5312	https://www.genecards.org/cgi-bin/carddisp.pl?gene=CYP2E1
NPC1	NPC Intracellular Cholesterol Transporter 1	Protein Coding	O15118	59	GC18M023506	10.5303	https://www.genecards.org/cgi-bin/carddisp.pl?gene=NPC1
RRM1	Ribonucleotide Reductase Catalytic Subunit M1	Protein Coding	P23921	58	GC11P010782	10.5225	https://www.genecards.org/cgi-bin/carddisp.pl?gene=RRM1
SKP1	S-Phase Kinase Associated Protein 1	Protein Coding	P63208	52	GC05M134148	10.5166	https://www.genecards.org/cgi-bin/carddisp.pl?gene=SKP1
STIM1	Stromal Interaction Molecule 1	Protein Coding	Q13586	58	GC11P010766	10.5043	https://www.genecards.org/cgi-bin/carddisp.pl?gene=STIM1
HESX1	HESX Homeobox 1	Protein Coding	Q9UBX0	47	GC03M057207	10.5022	https://www.genecards.org/cgi-bin/carddisp.pl?gene=HESX1
TRIAP1	TP53 Regulated Inhibitor Of Apoptosis 1	Protein Coding	O43715	40	GC12M120443	10.4904	https://www.genecards.org/cgi-bin/carddisp.pl?gene=TRIAP1
DIP2A	Disco Interacting Protein 2 Homolog A	Protein Coding	Q14689	47	GC21P046458	10.4825	https://www.genecards.org/cgi-bin/carddisp.pl?gene=DIP2A
NAXE	NAD(P)HX Epimerase	Protein Coding	Q8NCW5	49	GC01P156591	10.4769	https://www.genecards.org/cgi-bin/carddisp.pl?gene=NAXE
SUOX	Sulfite Oxidase	Protein Coding	P51687	53	GC12P055997	10.4759	https://www.genecards.org/cgi-bin/carddisp.pl?gene=SUOX
PIK3R1	Phosphoinositide-3-Kinase Regulatory Subunit 1	Protein Coding	P27986	60	GC05P068215	10.4755	https://www.genecards.org/cgi-bin/carddisp.pl?gene=PIK3R1
RPUSD3	RNA Pseudouridine Synthase D3	Protein Coding	Q6P087	38	GC03M009839	10.4631	https://www.genecards.org/cgi-bin/carddisp.pl?gene=RPUSD3
ECI1	Enoyl-CoA Delta Isomerase 1	Protein Coding	P42126	42	GC16M002239	10.4583	https://www.genecards.org/cgi-bin/carddisp.pl?gene=ECI1
CASR	Calcium Sensing Receptor	Protein Coding	P41180	60	GC03P122183	10.4539	https://www.genecards.org/cgi-bin/carddisp.pl?gene=CASR
DDX28	DEAD-Box Helicase 28	Protein Coding	Q9NUL7	43	GC16M073105	10.4526	https://www.genecards.org/cgi-bin/carddisp.pl?gene=DDX28
MMADHC	Metabolism Of Cobalamin Associated D	Protein Coding	Q9H3L0	50	GC02M149569	10.4499	https://www.genecards.org/cgi-bin/carddisp.pl?gene=MMADHC
MET	MET Proto-Oncogene, Receptor Tyrosine Kinase	Protein Coding	P08581	63	GC07P116672	10.4489	https://www.genecards.org/cgi-bin/carddisp.pl?gene=MET
IGF2	Insulin Like Growth Factor 2	Protein Coding	P01344	58	GC11M011904	10.444	https://www.genecards.org/cgi-bin/carddisp.pl?gene=IGF2
BIRC5	Baculoviral IAP Repeat Containing 5	Protein Coding	O15392	55	GC17P078214	10.4396	https://www.genecards.org/cgi-bin/carddisp.pl?gene=BIRC5
SATB2	SATB Homeobox 2	Protein Coding	Q9UPW6	54	GC02M199269	10.4314	https://www.genecards.org/cgi-bin/carddisp.pl?gene=SATB2
ABHD10	Abhydrolase Domain Containing 10, Depalmitoylase	Protein Coding	Q9NUJ1	44	GC03P111980	10.4287	https://www.genecards.org/cgi-bin/carddisp.pl?gene=ABHD10
CALM1	Calmodulin 1	Protein Coding	P0DP23	54	GC14P090396	10.4273	https://www.genecards.org/cgi-bin/carddisp.pl?gene=CALM1
HSPA5	Heat Shock Protein Family A (Hsp70) Member 5	Protein Coding	P11021	58	GC09M125234	10.4118	https://www.genecards.org/cgi-bin/carddisp.pl?gene=HSPA5
IRF2BPL	Interferon Regulatory Factor 2 Binding Protein Like	Protein Coding	Q9H1B7	47	GC14M077024	10.4091	https://www.genecards.org/cgi-bin/carddisp.pl?gene=IRF2BPL
THG1L	TRNA-Histidine Guanylyltransferase 1 Like	Protein Coding	Q9NWX6	46	GC05P157731	10.4045	https://www.genecards.org/cgi-bin/carddisp.pl?gene=THG1L
CDK5	Cyclin Dependent Kinase 5	Protein Coding	Q00535	62	GC07M151053	10.4028	https://www.genecards.org/cgi-bin/carddisp.pl?gene=CDK5
YWHAE	Tyrosine 3-Monooxygenase/Tryptophan 5-Monooxygenase Activation Protein Epsilon	Protein Coding	P62258	58	GC17M074382	10.3989	https://www.genecards.org/cgi-bin/carddisp.pl?gene=YWHAE
ATF6	Activating Transcription Factor 6	Protein Coding	P18850	57	GC01P161766	10.3987	https://www.genecards.org/cgi-bin/carddisp.pl?gene=ATF6
ABCC8	ATP Binding Cassette Subfamily C Member 8	Protein Coding	Q09428	54	GC11M017392	10.3982	https://www.genecards.org/cgi-bin/carddisp.pl?gene=ABCC8
NBN	Nibrin	Protein Coding	O60934	57	GC08M089933	10.3975	https://www.genecards.org/cgi-bin/carddisp.pl?gene=NBN
SLC9A1	Solute Carrier Family 9 Member A1	Protein Coding	P19634	58	GC01M031098	10.3962	https://www.genecards.org/cgi-bin/carddisp.pl?gene=SLC9A1
ME3	Malic Enzyme 3	Protein Coding	Q16798	45	GC11M125976	10.3816	https://www.genecards.org/cgi-bin/carddisp.pl?gene=ME3
NME4	NME/NM23 Nucleoside Diphosphate Kinase 4	Protein Coding	O00746	51	GC16P000396	10.3696	https://www.genecards.org/cgi-bin/carddisp.pl?gene=NME4
TNNT2	Troponin T2, Cardiac Type	Protein Coding	P45379	56	GC01M201359	10.3619	https://www.genecards.org/cgi-bin/carddisp.pl?gene=TNNT2
COA4	Cytochrome C Oxidase Assembly Factor 4 Homolog	Protein Coding	Q9NYJ1	40	GC11M073872	10.3595	https://www.genecards.org/cgi-bin/carddisp.pl?gene=COA4
SLC25A52	Solute Carrier Family 25 Member 52	Protein Coding	Q3SY17	37	GC18M031759	10.3545	https://www.genecards.org/cgi-bin/carddisp.pl?gene=SLC25A52
DLG4	Discs Large MAGUK Scaffold Protein 4	Protein Coding	P78352	57	GC17M074828	10.3431	https://www.genecards.org/cgi-bin/carddisp.pl?gene=DLG4
CIC	Capicua Transcriptional Repressor	Protein Coding	Q96RK0	52	GC19P042268	10.3383	https://www.genecards.org/cgi-bin/carddisp.pl?gene=CIC
SCN4A	Sodium Voltage-Gated Channel Alpha Subunit 4	Protein Coding	P35499	54	GC17M063938	10.3298	https://www.genecards.org/cgi-bin/carddisp.pl?gene=SCN4A
PMM2	Phosphomannomutase 2	Protein Coding	O15305	55	GC16P008788	10.309	https://www.genecards.org/cgi-bin/carddisp.pl?gene=PMM2
MIR17	MicroRNA 17	RNA Gene		26	GC13P091350	10.2966	https://www.genecards.org/cgi-bin/carddisp.pl?gene=MIR17
PABPN1	Poly(A) Binding Protein Nuclear 1	Protein Coding	Q86U42	53	GC14P047396	10.2764	https://www.genecards.org/cgi-bin/carddisp.pl?gene=PABPN1
LOC129999056	ATAC-STARR-Seq Lymphoblastoid Active Region 26441	Functional Element		5	GC07P107310	10.2647	https://www.genecards.org/cgi-bin/carddisp.pl?gene=LOC129999056
GJB6	Gap Junction Protein Beta 6	Protein Coding	O95452	51	GC13M020221	10.2558	https://www.genecards.org/cgi-bin/carddisp.pl?gene=GJB6
MIR34A	MicroRNA 34a	RNA Gene		29	GC01M014460	10.2537	https://www.genecards.org/cgi-bin/carddisp.pl?gene=MIR34A
F9	Coagulation Factor IX	Protein Coding	P00740	56	GC0XP139530	10.246	https://www.genecards.org/cgi-bin/carddisp.pl?gene=F9
NEFL	Neurofilament Light Chain	Protein Coding	P07196	54	GC08M024950	10.2448	https://www.genecards.org/cgi-bin/carddisp.pl?gene=NEFL
MMAB	Metabolism Of Cobalamin Associated B	Protein Coding	Q96EY8	52	GC12M109553	10.2434	https://www.genecards.org/cgi-bin/carddisp.pl?gene=MMAB
MPO	Myeloperoxidase	Protein Coding	P05164	61	GC17M058269	10.2329	https://www.genecards.org/cgi-bin/carddisp.pl?gene=MPO
DNAJC5	DnaJ Heat Shock Protein Family (Hsp40) Member C5	Protein Coding	Q9H3Z4	51	GC20P063895	10.2154	https://www.genecards.org/cgi-bin/carddisp.pl?gene=DNAJC5
NPHS1	NPHS1 Adhesion Molecule, Nephrin	Protein Coding	O60500	55	GC19M035825	10.2129	https://www.genecards.org/cgi-bin/carddisp.pl?gene=NPHS1
EPO	Erythropoietin	Protein Coding	P01588	52	GC07P100720	10.2129	https://www.genecards.org/cgi-bin/carddisp.pl?gene=EPO
UQCR10	Ubiquinol-Cytochrome C Reductase, Complex III Subunit X	Protein Coding	Q9UDW1	45	GC22P029767	10.1963	https://www.genecards.org/cgi-bin/carddisp.pl?gene=UQCR10
TMEM186	Transmembrane Protein 186	Protein Coding	Q96B77	41	GC16M008780	10.1921	https://www.genecards.org/cgi-bin/carddisp.pl?gene=TMEM186
IL1A	Interleukin 1 Alpha	Protein Coding	P01583	54	GC02M112773	10.1913	https://www.genecards.org/cgi-bin/carddisp.pl?gene=IL1A
HSPA1A	Heat Shock Protein Family A (Hsp70) Member 1A	Protein Coding	P0DMV8	55	GC06P134838	10.1857	https://www.genecards.org/cgi-bin/carddisp.pl?gene=HSPA1A
PPM1K	Protein Phosphatase, Mg2+/Mn2+ Dependent 1K	Protein Coding	Q8N3J5	48	GC04M088258	10.18	https://www.genecards.org/cgi-bin/carddisp.pl?gene=PPM1K
ATP5MJ	ATP Synthase Membrane Subunit J	Protein Coding	P56378	38	GC14M119919	10.1798	https://www.genecards.org/cgi-bin/carddisp.pl?gene=ATP5MJ
LOC130058198	ATAC-STARR-Seq Lymphoblastoid Active Region 10241	Functional Element		4	GC16P089199	10.1744	https://www.genecards.org/cgi-bin/carddisp.pl?gene=LOC130058198
MLYCD	Malonyl-CoA Decarboxylase	Protein Coding	O95822	50	GC16P083899	10.1697	https://www.genecards.org/cgi-bin/carddisp.pl?gene=MLYCD
BAG3	BAG Cochaperone 3	Protein Coding	O95817	52	GC10P119651	10.1644	https://www.genecards.org/cgi-bin/carddisp.pl?gene=BAG3
CHCHD1	Coiled-Coil-Helix-Coiled-Coil-Helix Domain Containing 1	Protein Coding	Q96BP2	38	GC10P073782	10.1634	https://www.genecards.org/cgi-bin/carddisp.pl?gene=CHCHD1
ATP6V1B1	ATPase H+ Transporting V1 Subunit B1	Protein Coding	P15313	52	GC02P070935	10.1583	https://www.genecards.org/cgi-bin/carddisp.pl?gene=ATP6V1B1
UNG	Uracil DNA Glycosylase	Protein Coding	P13051	55	GC12P109097	10.1569	https://www.genecards.org/cgi-bin/carddisp.pl?gene=UNG
FA2H	Fatty Acid 2-Hydroxylase	Protein Coding	Q7L5A8	53	GC16M074712	10.1545	https://www.genecards.org/cgi-bin/carddisp.pl?gene=FA2H
ANXA5	Annexin A5	Protein Coding	P08758	56	GC04M121667	10.1524	https://www.genecards.org/cgi-bin/carddisp.pl?gene=ANXA5
GLA	Galactosidase Alpha	Protein Coding	P06280	58	GC0XM101393	10.1443	https://www.genecards.org/cgi-bin/carddisp.pl?gene=GLA
CST3	Cystatin C	Protein Coding	P01034	53	GC20M023930	10.1392	https://www.genecards.org/cgi-bin/carddisp.pl?gene=CST3
ADGRV1	Adhesion G Protein-Coupled Receptor V1	Protein Coding	Q8WXG9	50	GC05P090529	10.1368	https://www.genecards.org/cgi-bin/carddisp.pl?gene=ADGRV1
PPP2R2B	Protein Phosphatase 2 Regulatory Subunit Bbeta	Protein Coding	Q00005	53	GC05M146582	10.1312	https://www.genecards.org/cgi-bin/carddisp.pl?gene=PPP2R2B
CTLA4	Cytotoxic T-Lymphocyte Associated Protein 4	Protein Coding	P16410	57	GC02P203866	10.128	https://www.genecards.org/cgi-bin/carddisp.pl?gene=CTLA4
KDM3B	Lysine Demethylase 3B	Protein Coding	Q7LBC6	55	GC05P138352	10.1251	https://www.genecards.org/cgi-bin/carddisp.pl?gene=KDM3B
AGTR1	Angiotensin II Receptor Type 1	Protein Coding	P30556	60	GC03P148697	10.1195	https://www.genecards.org/cgi-bin/carddisp.pl?gene=AGTR1
AK3	Adenylate Kinase 3	Protein Coding	Q9UIJ7	47	GC09M004709	10.111	https://www.genecards.org/cgi-bin/carddisp.pl?gene=AK3
BCAT2	Branched Chain Amino Acid Transaminase 2	Protein Coding	O15382	53	GC19M048795	10.1031	https://www.genecards.org/cgi-bin/carddisp.pl?gene=BCAT2
RET	Ret Proto-Oncogene	Protein Coding	P07949	63	GC10P044403	10.0975	https://www.genecards.org/cgi-bin/carddisp.pl?gene=RET
BCAP31	B Cell Receptor Associated Protein 31	Protein Coding	P51572	50	GC0XM153701	10.0923	https://www.genecards.org/cgi-bin/carddisp.pl?gene=BCAP31
APC	APC Regulator Of WNT Signaling Pathway	Protein Coding	P25054	58	GC05P112707	10.0831	https://www.genecards.org/cgi-bin/carddisp.pl?gene=APC
MIR128-1	MicroRNA 128-1	RNA Gene		26	GC02P135665	10.0802	https://www.genecards.org/cgi-bin/carddisp.pl?gene=MIR128-1
MISFA	Mitochondrial Sheath Formation Associated	Protein Coding	A0A0U1RRN3	16	GC11P019152	10.0714	https://www.genecards.org/cgi-bin/carddisp.pl?gene=MISFA
COL18A1	Collagen Type XVIII Alpha 1 Chain	Protein Coding	P39060	55	GC21P045405	10.0678	https://www.genecards.org/cgi-bin/carddisp.pl?gene=COL18A1
DRD3	Dopamine Receptor D3	Protein Coding	P35462	52	GC03M114128	10.0653	https://www.genecards.org/cgi-bin/carddisp.pl?gene=DRD3
EED	Embryonic Ectoderm Development	Protein Coding	O75530	52	GC11P090426	10.0608	https://www.genecards.org/cgi-bin/carddisp.pl?gene=EED
CLN5	CLN5 Intracellular Trafficking Protein	Protein Coding	O75503	50	GC13P076990	10.0598	https://www.genecards.org/cgi-bin/carddisp.pl?gene=CLN5
TUSC2	Tumor Suppressor 2, Mitochondrial Calcium Regulator	Protein Coding	O75896	39	GC03M053795	10.0575	https://www.genecards.org/cgi-bin/carddisp.pl?gene=TUSC2
TPM1	Tropomyosin 1	Protein Coding	P09493	58	GC15P165361	10.0555	https://www.genecards.org/cgi-bin/carddisp.pl?gene=TPM1
GSTM1	Glutathione S-Transferase Mu 1	Protein Coding	P09488	51	GC01P109687	10.053	https://www.genecards.org/cgi-bin/carddisp.pl?gene=GSTM1
GAS5	Growth Arrest Specific 5	RNA Gene		31	GC01M173947	10.0505	https://www.genecards.org/cgi-bin/carddisp.pl?gene=GAS5
IVD	Isovaleryl-CoA Dehydrogenase	Protein Coding	P26440	51	GC15P040405	10.0463	https://www.genecards.org/cgi-bin/carddisp.pl?gene=IVD
HNF1B	HNF1 Homeobox B	Protein Coding	P35680	52	GC17M037686	10.0437	https://www.genecards.org/cgi-bin/carddisp.pl?gene=HNF1B
ABCC2	ATP Binding Cassette Subfamily C Member 2	Protein Coding	Q92887	57	GC10P099782	10.0421	https://www.genecards.org/cgi-bin/carddisp.pl?gene=ABCC2
CDK1	Cyclin Dependent Kinase 1	Protein Coding	P06493	56	GC10P060772	10.0401	https://www.genecards.org/cgi-bin/carddisp.pl?gene=CDK1
TKFC	Triokinase And FMN Cyclase	Protein Coding	Q3LXA3	48	GC11P088723	10.0325	https://www.genecards.org/cgi-bin/carddisp.pl?gene=TKFC
PRICKLE2	Prickle Planar Cell Polarity Protein 2	Protein Coding	Q7Z3G6	48	GC03M064092	10.0124	https://www.genecards.org/cgi-bin/carddisp.pl?gene=PRICKLE2
F12	Coagulation Factor XII	Protein Coding	P00748	56	GC05M177402	10.0109	https://www.genecards.org/cgi-bin/carddisp.pl?gene=F12
CRH	Corticotropin Releasing Hormone	Protein Coding	P06850	52	GC08M066176	10.0098	https://www.genecards.org/cgi-bin/carddisp.pl?gene=CRH
VIM	Vimentin	Protein Coding	P08670	60	GC10P017227	9.99446	https://www.genecards.org/cgi-bin/carddisp.pl?gene=VIM
MMP1	Matrix Metallopeptidase 1	Protein Coding	P03956	59	GC11M126178	9.98806	https://www.genecards.org/cgi-bin/carddisp.pl?gene=MMP1
VDR	Vitamin D Receptor	Protein Coding	P11473	57	GC12M047841	9.9868	https://www.genecards.org/cgi-bin/carddisp.pl?gene=VDR
ERBB2	Erb-B2 Receptor Tyrosine Kinase 2	Protein Coding	P04626	63	GC17P039687	9.98381	https://www.genecards.org/cgi-bin/carddisp.pl?gene=ERBB2
GJA1	Gap Junction Protein Alpha 1	Protein Coding	P17302	59	GC06P136245	9.98157	https://www.genecards.org/cgi-bin/carddisp.pl?gene=GJA1
PROP1	PROP Paired-Like Homeobox 1	Protein Coding	O75360	48	GC05M177992	9.97428	https://www.genecards.org/cgi-bin/carddisp.pl?gene=PROP1
APOA1	Apolipoprotein A1	Protein Coding	P02647	59	GC11M116835	9.97188	https://www.genecards.org/cgi-bin/carddisp.pl?gene=APOA1
GGT1	Gamma-Glutamyltransferase 1	Protein Coding	P19440	58	GC22P024583	9.96696	https://www.genecards.org/cgi-bin/carddisp.pl?gene=GGT1
ESR2	Estrogen Receptor 2	Protein Coding	Q92731	58	GC14M064084	9.96285	https://www.genecards.org/cgi-bin/carddisp.pl?gene=ESR2
MIR431	MicroRNA 431	RNA Gene		25	GC14P115743	9.96243	https://www.genecards.org/cgi-bin/carddisp.pl?gene=MIR431
HSPB1	Heat Shock Protein Family B (Small) Member 1	Protein Coding	P04792	60	GC07P076302	9.95261	https://www.genecards.org/cgi-bin/carddisp.pl?gene=HSPB1
LEPR	Leptin Receptor	Protein Coding	P48357	59	GC01P065438	9.95227	https://www.genecards.org/cgi-bin/carddisp.pl?gene=LEPR
ITGA2B	Integrin Subunit Alpha 2b	Protein Coding	P08514	60	GC17M077853	9.94883	https://www.genecards.org/cgi-bin/carddisp.pl?gene=ITGA2B
LOC130064280	ATAC-STARR-Seq Lymphoblastoid Silent Region 10545	Functional Element		4	GC19P119583	9.94833	https://www.genecards.org/cgi-bin/carddisp.pl?gene=LOC130064280
GUCY2D	Guanylate Cyclase 2D, Retinal	Protein Coding	Q02846	54	GC17P008002	9.94796	https://www.genecards.org/cgi-bin/carddisp.pl?gene=GUCY2D
ENTPD7	Ectonucleoside Triphosphate Diphosphohydrolase 7	Protein Coding	Q9NQZ7	42	GC10P099659	9.93771	https://www.genecards.org/cgi-bin/carddisp.pl?gene=ENTPD7
ADH1C	Alcohol Dehydrogenase 1C (Class I), Gamma Polypeptide	Protein Coding	P00326	50	GC04M099336	9.93303	https://www.genecards.org/cgi-bin/carddisp.pl?gene=ADH1C
AKAP1	A-Kinase Anchoring Protein 1	Protein Coding	Q92667	49	GC17P057085	9.92848	https://www.genecards.org/cgi-bin/carddisp.pl?gene=AKAP1
KMT2D	Lysine Methyltransferase 2D	Protein Coding	O14686	53	GC12M049018	9.92268	https://www.genecards.org/cgi-bin/carddisp.pl?gene=KMT2D
PLP1	Proteolipid Protein 1	Protein Coding	P60201	52	GC0XP103773	9.92194	https://www.genecards.org/cgi-bin/carddisp.pl?gene=PLP1
COASY	Coenzyme A Synthase	Protein Coding	Q13057	53	GC17P042561	9.91643	https://www.genecards.org/cgi-bin/carddisp.pl?gene=COASY
DHTKD1	Dehydrogenase E1 And Transketolase Domain Containing 1	Protein Coding	Q96HY7	48	GC10P012068	9.90493	https://www.genecards.org/cgi-bin/carddisp.pl?gene=DHTKD1
MIR155	MicroRNA 155	RNA Gene		29	GC21P025573	9.90352	https://www.genecards.org/cgi-bin/carddisp.pl?gene=MIR155
PNP	Purine Nucleoside Phosphorylase	Protein Coding	P00491	58	GC14P045700	9.89151	https://www.genecards.org/cgi-bin/carddisp.pl?gene=PNP
TRA-TGC7-1	TRNA-Ala (Anticodon TGC) 7-1	RNA Gene		14	GC06M093612	9.88484	https://www.genecards.org/cgi-bin/carddisp.pl?gene=TRA-TGC7-1
DHODH	Dihydroorotate Dehydrogenase (Quinone)	Protein Coding	Q02127	55	GC16P072008	9.87902	https://www.genecards.org/cgi-bin/carddisp.pl?gene=DHODH
IDH1	Isocitrate Dehydrogenase (NADP(+)) 1	Protein Coding	O75874	61	GC02M208236	9.87864	https://www.genecards.org/cgi-bin/carddisp.pl?gene=IDH1
NTRK2	Neurotrophic Receptor Tyrosine Kinase 2	Protein Coding	Q16620	62	GC09P084668	9.87753	https://www.genecards.org/cgi-bin/carddisp.pl?gene=NTRK2
ACOT9	Acyl-CoA Thioesterase 9	Protein Coding	Q9Y305	44	GC0XM023701	9.87131	https://www.genecards.org/cgi-bin/carddisp.pl?gene=ACOT9
CYBB	Cytochrome B-245 Beta Chain	Protein Coding	P04839	58	GC0XP037780	9.86813	https://www.genecards.org/cgi-bin/carddisp.pl?gene=CYBB
MOCOS	Molybdenum Cofactor Sulfurase	Protein Coding	Q96EN8	50	GC18P036187	9.86811	https://www.genecards.org/cgi-bin/carddisp.pl?gene=MOCOS
HECTD4	HECT Domain E3 Ubiquitin Protein Ligase 4	Protein Coding	Q9Y4D8	41	GC12M112160	9.86806	https://www.genecards.org/cgi-bin/carddisp.pl?gene=HECTD4
LHX3	LIM Homeobox 3	Protein Coding	Q9UBR4	50	GC09M136196	9.86552	https://www.genecards.org/cgi-bin/carddisp.pl?gene=LHX3
NCOR1	Nuclear Receptor Corepressor 1	Protein Coding	O75376	53	GC17M016029	9.86421	https://www.genecards.org/cgi-bin/carddisp.pl?gene=NCOR1
WDFY3	WD Repeat And FYVE Domain Containing 3	Protein Coding	Q8IZQ1	50	GC04M084759	9.85494	https://www.genecards.org/cgi-bin/carddisp.pl?gene=WDFY3
SLC25A53	Solute Carrier Family 25 Member 53	Protein Coding	Q5H9E4	38	GC0XM104099	9.85203	https://www.genecards.org/cgi-bin/carddisp.pl?gene=SLC25A53
AK4	Adenylate Kinase 4	Protein Coding	P27144	46	GC01P065147	9.85114	https://www.genecards.org/cgi-bin/carddisp.pl?gene=AK4
ABL1	ABL Proto-Oncogene 1, Non-Receptor Tyrosine Kinase	Protein Coding	P00519	61	GC09P130713	9.84504	https://www.genecards.org/cgi-bin/carddisp.pl?gene=ABL1
ACTL6B	Actin Like 6B	Protein Coding	O94805	50	GC07M100643	9.83613	https://www.genecards.org/cgi-bin/carddisp.pl?gene=ACTL6B
MIR133B	MicroRNA 133b	RNA Gene		29	GC06P052148	9.83061	https://www.genecards.org/cgi-bin/carddisp.pl?gene=MIR133B
SCARNA5	Small Cajal Body-Specific RNA 5	RNA Gene		23	GC02P233275	9.82871	https://www.genecards.org/cgi-bin/carddisp.pl?gene=SCARNA5
AGT	Angiotensinogen	Protein Coding	P01019	58	GC01M230690	9.82751	https://www.genecards.org/cgi-bin/carddisp.pl?gene=AGT
SUCLG2	Succinate-CoA Ligase GDP-Forming Subunit Beta	Protein Coding	Q96I99	48	GC03M067358	9.82151	https://www.genecards.org/cgi-bin/carddisp.pl?gene=SUCLG2
CD40LG	CD40 Ligand	Protein Coding	P29965	59	GC0XP136649	9.81498	https://www.genecards.org/cgi-bin/carddisp.pl?gene=CD40LG
FGF2	Fibroblast Growth Factor 2	Protein Coding	P09038	54	GC04P122826	9.81454	https://www.genecards.org/cgi-bin/carddisp.pl?gene=FGF2
NR1H4	Nuclear Receptor Subfamily 1 Group H Member 4	Protein Coding	Q96RI1	56	GC12P100473	9.81177	https://www.genecards.org/cgi-bin/carddisp.pl?gene=NR1H4
RBBP8	RB Binding Protein 8, Endonuclease	Protein Coding	Q99708	53	GC18P022798	9.80815	https://www.genecards.org/cgi-bin/carddisp.pl?gene=RBBP8
GALC	Galactosylceramidase	Protein Coding	P54803	53	GC14M087837	9.80284	https://www.genecards.org/cgi-bin/carddisp.pl?gene=GALC
PPP3CA	Protein Phosphatase 3 Catalytic Subunit Alpha	Protein Coding	Q08209	60	GC04M101024	9.79997	https://www.genecards.org/cgi-bin/carddisp.pl?gene=PPP3CA
MFSD8	Major Facilitator Superfamily Domain Containing 8	Protein Coding	Q8NHS3	45	GC04M127917	9.79924	https://www.genecards.org/cgi-bin/carddisp.pl?gene=MFSD8
CEP104	Centrosomal Protein 104	Protein Coding	O60308	47	GC01M003812	9.79382	https://www.genecards.org/cgi-bin/carddisp.pl?gene=CEP104
POGZ	Pogo Transposable Element Derived With ZNF Domain	Protein Coding	Q7Z3K3	50	GC01M151402	9.78373	https://www.genecards.org/cgi-bin/carddisp.pl?gene=POGZ
MIR29A	MicroRNA 29a	RNA Gene		29	GC07M130876	9.7826	https://www.genecards.org/cgi-bin/carddisp.pl?gene=MIR29A
HMGB1	High Mobility Group Box 1	Protein Coding	P09429	57	GC13M030456	9.77085	https://www.genecards.org/cgi-bin/carddisp.pl?gene=HMGB1
KDM5B	Lysine Demethylase 5B	Protein Coding	Q9UGL1	54	GC01M202696	9.76765	https://www.genecards.org/cgi-bin/carddisp.pl?gene=KDM5B
TYMS	Thymidylate Synthetase	Protein Coding	P04818	59	GC18P000657	9.74816	https://www.genecards.org/cgi-bin/carddisp.pl?gene=TYMS
JUP	Junction Plakoglobin	Protein Coding	P14923	58	GC17M041754	9.731	https://www.genecards.org/cgi-bin/carddisp.pl?gene=JUP
CLN6	CLN6 Transmembrane ER Protein	Protein Coding	Q9NWW5	47	GC15M068206	9.72583	https://www.genecards.org/cgi-bin/carddisp.pl?gene=CLN6
KDR	Kinase Insert Domain Receptor	Protein Coding	P35968	62	GC04M055078	9.72297	https://www.genecards.org/cgi-bin/carddisp.pl?gene=KDR
MYH14	Myosin Heavy Chain 14	Protein Coding	Q7Z406	54	GC19P113478	9.72142	https://www.genecards.org/cgi-bin/carddisp.pl?gene=MYH14
GATA1	GATA Binding Protein 1	Protein Coding	P15976	55	GC0XP048786	9.71719	https://www.genecards.org/cgi-bin/carddisp.pl?gene=GATA1
CISD2	CDGSH Iron Sulfur Domain 2	Protein Coding	Q8N5K1	49	GC04P102868	9.71254	https://www.genecards.org/cgi-bin/carddisp.pl?gene=CISD2
ABCG2	ATP Binding Cassette Subfamily G Member 2 (JR Blood Group)	Protein Coding	Q9UNQ0	59	GC04M088090	9.71095	https://www.genecards.org/cgi-bin/carddisp.pl?gene=ABCG2
PTCH1	Patched 1	Protein Coding	Q13635	60	GC09M095442	9.70931	https://www.genecards.org/cgi-bin/carddisp.pl?gene=PTCH1
VCL	Vinculin	Protein Coding	P18206	56	GC10P073995	9.70724	https://www.genecards.org/cgi-bin/carddisp.pl?gene=VCL
PSAP	Prosaposin	Protein Coding	P07602	56	GC10M071816	9.70315	https://www.genecards.org/cgi-bin/carddisp.pl?gene=PSAP
UBE3A	Ubiquitin Protein Ligase E3A	Protein Coding	Q05086	57	GC15M025333	9.70199	https://www.genecards.org/cgi-bin/carddisp.pl?gene=UBE3A
ALS2	Alsin Rho Guanine Nucleotide Exchange Factor ALS2	Protein Coding	Q96Q42	53	GC02M201701	9.69554	https://www.genecards.org/cgi-bin/carddisp.pl?gene=ALS2
AGXT	Alanine--Glyoxylate Aminotransferase	Protein Coding	P21549	54	GC02P240868	9.68722	https://www.genecards.org/cgi-bin/carddisp.pl?gene=AGXT
PGR	Progesterone Receptor	Protein Coding	P06401	59	GC11M126145	9.68116	https://www.genecards.org/cgi-bin/carddisp.pl?gene=PGR
WDR45	WD Repeat Domain 45	Protein Coding	Q9Y484	49	GC0XM049074	9.68063	https://www.genecards.org/cgi-bin/carddisp.pl?gene=WDR45
HLA-DQB1	Major Histocompatibility Complex, Class II, DQ Beta 1	Protein Coding	P01920	52	GC06M093843	9.67901	https://www.genecards.org/cgi-bin/carddisp.pl?gene=HLA-DQB1
AURKAIP1	Aurora Kinase A Interacting Protein 1	Protein Coding	Q9NWT8	42	GC01M001373	9.67813	https://www.genecards.org/cgi-bin/carddisp.pl?gene=AURKAIP1
UQCC1	Ubiquinol-Cytochrome C Reductase Complex Assembly Factor 1	Protein Coding	Q9NVA1	44	GC20M035302	9.67351	https://www.genecards.org/cgi-bin/carddisp.pl?gene=UQCC1
NEAT1	Nuclear Paraspeckle Assembly Transcript 1	RNA Gene		32	GC11P089078	9.67112	https://www.genecards.org/cgi-bin/carddisp.pl?gene=NEAT1
ABCC1	ATP Binding Cassette Subfamily C Member 1 (ABCC1 Blood Group)	Protein Coding	P33527	56	GC16P015949	9.67046	https://www.genecards.org/cgi-bin/carddisp.pl?gene=ABCC1
HGF	Hepatocyte Growth Factor	Protein Coding	P14210	60	GC07M081699	9.66913	https://www.genecards.org/cgi-bin/carddisp.pl?gene=HGF
METTL8	Methyltransferase 8, TRNA N3-Cytidine	Protein Coding	Q9H825	39	GC02M171317	9.66793	https://www.genecards.org/cgi-bin/carddisp.pl?gene=METTL8
RHOA	Ras Homolog Family Member A	Protein Coding	P61586	59	GC03M049359	9.66082	https://www.genecards.org/cgi-bin/carddisp.pl?gene=RHOA
MAF	MAF BZIP Transcription Factor	Protein Coding	O75444	54	GC16M079204	9.64469	https://www.genecards.org/cgi-bin/carddisp.pl?gene=MAF
IQCB1	IQ Motif Containing B1	Protein Coding	Q15051	50	GC03M121769	9.6393	https://www.genecards.org/cgi-bin/carddisp.pl?gene=IQCB1
CDKL5	Cyclin Dependent Kinase Like 5	Protein Coding	O76039	52	GC0XP018425	9.63905	https://www.genecards.org/cgi-bin/carddisp.pl?gene=CDKL5
FGFR2	Fibroblast Growth Factor Receptor 2	Protein Coding	P21802	64	GC10M121478	9.63114	https://www.genecards.org/cgi-bin/carddisp.pl?gene=FGFR2
NR1H2	Nuclear Receptor Subfamily 1 Group H Member 2	Protein Coding	P55055	54	GC19P050329	9.63096	https://www.genecards.org/cgi-bin/carddisp.pl?gene=NR1H2
EHHADH	Enoyl-CoA Hydratase And 3-Hydroxyacyl CoA Dehydrogenase	Protein Coding	Q08426	51	GC03M185190	9.62711	https://www.genecards.org/cgi-bin/carddisp.pl?gene=EHHADH
DOCK8	Dedicator Of Cytokinesis 8	Protein Coding	Q8NF50	54	GC09P000267	9.62022	https://www.genecards.org/cgi-bin/carddisp.pl?gene=DOCK8
GLS2	Glutaminase 2	Protein Coding	Q9UI32	47	GC12M056470	9.6189	https://www.genecards.org/cgi-bin/carddisp.pl?gene=GLS2
MIR494	MicroRNA 494	RNA Gene		24	GC14P116771	9.61218	https://www.genecards.org/cgi-bin/carddisp.pl?gene=MIR494
CDH1	Cadherin 1	Protein Coding	P12830	58	GC16P068737	9.60527	https://www.genecards.org/cgi-bin/carddisp.pl?gene=CDH1
SLC25A40	Solute Carrier Family 25 Member 40	Protein Coding	Q8TBP6	38	GC07M087833	9.60302	https://www.genecards.org/cgi-bin/carddisp.pl?gene=SLC25A40
ALG1	ALG1 Chitobiosyldiphosphodolichol Beta-Mannosyltransferase	Protein Coding	Q9BT22	53	GC16P005033	9.59956	https://www.genecards.org/cgi-bin/carddisp.pl?gene=ALG1
SMAD3	SMAD Family Member 3	Protein Coding	P84022	61	GC15P067063	9.58845	https://www.genecards.org/cgi-bin/carddisp.pl?gene=SMAD3
MIR484	MicroRNA 484	RNA Gene		24	GC16P080798	9.58434	https://www.genecards.org/cgi-bin/carddisp.pl?gene=MIR484
PAX6	Paired Box 6	Protein Coding	P26367	57	GC11M031784	9.58107	https://www.genecards.org/cgi-bin/carddisp.pl?gene=PAX6
ATF2	Activating Transcription Factor 2	Protein Coding	P15336	54	GC02M175072	9.57929	https://www.genecards.org/cgi-bin/carddisp.pl?gene=ATF2
OXCT1	3-Oxoacid CoA-Transferase 1	Protein Coding	P55809	52	GC05M041732	9.57317	https://www.genecards.org/cgi-bin/carddisp.pl?gene=OXCT1
GABRG2	Gamma-Aminobutyric Acid Type A Receptor Subunit Gamma2	Protein Coding	P18507	57	GC05P162000	9.57003	https://www.genecards.org/cgi-bin/carddisp.pl?gene=GABRG2
BBC3	BCL2 Binding Component 3	Protein Coding	Q96PG8	49	GC19M047220	9.56808	https://www.genecards.org/cgi-bin/carddisp.pl?gene=BBC3
RPGRIP1L	RPGRIP1 Like	Protein Coding	Q68CZ1	51	GC16M053701	9.56714	https://www.genecards.org/cgi-bin/carddisp.pl?gene=RPGRIP1L
TRIM54	Tripartite Motif Containing 54	Protein Coding	Q9BYV2	44	GC02P028517	9.5531	https://www.genecards.org/cgi-bin/carddisp.pl?gene=TRIM54
WDR19	WD Repeat Domain 19	Protein Coding	Q8NEZ3	47	GC04P039184	9.54332	https://www.genecards.org/cgi-bin/carddisp.pl?gene=WDR19
CXCL12	C-X-C Motif Chemokine Ligand 12	Protein Coding	P48061	54	GC10M044370	9.53332	https://www.genecards.org/cgi-bin/carddisp.pl?gene=CXCL12
SETBP1	SET Binding Protein 1	Protein Coding	Q9Y6X0	51	GC18P044680	9.52744	https://www.genecards.org/cgi-bin/carddisp.pl?gene=SETBP1
KNG1	Kininogen 1	Protein Coding	P01042	56	GC03P186717	9.52206	https://www.genecards.org/cgi-bin/carddisp.pl?gene=KNG1
ACTA1	Actin Alpha 1, Skeletal Muscle	Protein Coding	P68133	56	GC01M230217	9.52202	https://www.genecards.org/cgi-bin/carddisp.pl?gene=ACTA1
ABCB4	ATP Binding Cassette Subfamily B Member 4	Protein Coding	P21439	55	GC07M087365	9.51777	https://www.genecards.org/cgi-bin/carddisp.pl?gene=ABCB4
IL2RA	Interleukin 2 Receptor Subunit Alpha	Protein Coding	P01589	59	GC10M006010	9.51612	https://www.genecards.org/cgi-bin/carddisp.pl?gene=IL2RA
REXO2	RNA Exonuclease 2	Protein Coding	Q9Y3B8	44	GC11P114439	9.51026	https://www.genecards.org/cgi-bin/carddisp.pl?gene=REXO2
HOGA1	4-Hydroxy-2-Oxoglutarate Aldolase 1	Protein Coding	Q86XE5	49	GC10P109556	9.50932	https://www.genecards.org/cgi-bin/carddisp.pl?gene=HOGA1
RAG1	Recombination Activating 1	Protein Coding	P15918	53	GC11P036554	9.50913	https://www.genecards.org/cgi-bin/carddisp.pl?gene=RAG1
HDAC1	Histone Deacetylase 1	Protein Coding	Q13547	59	GC01P032292	9.5013	https://www.genecards.org/cgi-bin/carddisp.pl?gene=HDAC1
SFXN1	Sideroflexin 1	Protein Coding	Q9H9B4	46	GC05P175477	9.49759	https://www.genecards.org/cgi-bin/carddisp.pl?gene=SFXN1
CSF1R	Colony Stimulating Factor 1 Receptor	Protein Coding	P07333	61	GC05M150053	9.4914	https://www.genecards.org/cgi-bin/carddisp.pl?gene=CSF1R
MRE11	MRE11 Homolog, Double Strand Break Repair Nuclease	Protein Coding	P49959	57	GC11M126070	9.48976	https://www.genecards.org/cgi-bin/carddisp.pl?gene=MRE11
TRP-AGG2-5	TRNA-Pro (Anticodon AGG) 2-5	RNA Gene		17	GC14M026908	9.48216	https://www.genecards.org/cgi-bin/carddisp.pl?gene=TRP-AGG2-5
METTL17	Methyltransferase Like 17	Protein Coding	Q9H7H0	38	GC14P045749	9.47301	https://www.genecards.org/cgi-bin/carddisp.pl?gene=METTL17
LBR	Lamin B Receptor	Protein Coding	Q14739	55	GC01M225401	9.46766	https://www.genecards.org/cgi-bin/carddisp.pl?gene=LBR
LOC130009240	ATAC-STARR-Seq Lymphoblastoid Silent Region 5107	Functional Element		6	GC12P134487	9.46553	https://www.genecards.org/cgi-bin/carddisp.pl?gene=LOC130009240
RXRA	Retinoid X Receptor Alpha	Protein Coding	P19793	57	GC09P134317	9.46521	https://www.genecards.org/cgi-bin/carddisp.pl?gene=RXRA
KIT	KIT Proto-Oncogene, Receptor Tyrosine Kinase	Protein Coding	P10721	62	GC04P054657	9.46442	https://www.genecards.org/cgi-bin/carddisp.pl?gene=KIT
NFKBIA	NFKB Inhibitor Alpha	Protein Coding	P25963	59	GC14M035401	9.46115	https://www.genecards.org/cgi-bin/carddisp.pl?gene=NFKBIA
MIR122	MicroRNA 122	RNA Gene		29	GC18P058451	9.45916	https://www.genecards.org/cgi-bin/carddisp.pl?gene=MIR122
CCDC51	Coiled-Coil Domain Containing 51	Protein Coding	Q96ER9	37	GC03M048432	9.45881	https://www.genecards.org/cgi-bin/carddisp.pl?gene=CCDC51
POLR3A	RNA Polymerase III Subunit A	Protein Coding	O14802	53	GC10M079112	9.45086	https://www.genecards.org/cgi-bin/carddisp.pl?gene=POLR3A
MIR381	MicroRNA 381	RNA Gene		26	GC14P116759	9.44702	https://www.genecards.org/cgi-bin/carddisp.pl?gene=MIR381
TULP1	TUB Like Protein 1	Protein Coding	O00294	50	GC06M093924	9.44531	https://www.genecards.org/cgi-bin/carddisp.pl?gene=TULP1
CNGB3	Cyclic Nucleotide Gated Channel Subunit Beta 3	Protein Coding	Q9NQW8	50	GC08M086553	9.4447	https://www.genecards.org/cgi-bin/carddisp.pl?gene=CNGB3
IFIH1	Interferon Induced With Helicase C Domain 1	Protein Coding	Q9BYX4	57	GC02M162267	9.43772	https://www.genecards.org/cgi-bin/carddisp.pl?gene=IFIH1
NPHP1	Nephrocystin 1	Protein Coding	O15259	52	GC02M110122	9.43191	https://www.genecards.org/cgi-bin/carddisp.pl?gene=NPHP1
RYR2	Ryanodine Receptor 2	Protein Coding	Q92736	55	GC01P237042	9.42942	https://www.genecards.org/cgi-bin/carddisp.pl?gene=RYR2
BRIP1	BRCA1 Interacting Helicase 1	Protein Coding	Q9BX63	57	GC17M061679	9.4294	https://www.genecards.org/cgi-bin/carddisp.pl?gene=BRIP1
TP63	Tumor Protein P63	Protein Coding	Q9H3D4	55	GC03P189598	9.42807	https://www.genecards.org/cgi-bin/carddisp.pl?gene=TP63
FASTKD3	FAST Kinase Domains 3	Protein Coding	Q14CZ7	38	GC05M007860	9.42734	https://www.genecards.org/cgi-bin/carddisp.pl?gene=FASTKD3
ALDH1L2	Aldehyde Dehydrogenase 1 Family Member L2	Protein Coding	Q3SY69	47	GC12M105019	9.42107	https://www.genecards.org/cgi-bin/carddisp.pl?gene=ALDH1L2
CP	Ceruloplasmin	Protein Coding	P00450	57	GC03M149162	9.40847	https://www.genecards.org/cgi-bin/carddisp.pl?gene=CP
ALDH1B1	Aldehyde Dehydrogenase 1 Family Member B1	Protein Coding	P30837	50	GC09P038392	9.40818	https://www.genecards.org/cgi-bin/carddisp.pl?gene=ALDH1B1
RELA	RELA Proto-Oncogene, NF-KB Subunit	Protein Coding	Q04206	60	GC11M065653	9.39171	https://www.genecards.org/cgi-bin/carddisp.pl?gene=RELA
EGF	Epidermal Growth Factor	Protein Coding	P01133	60	GC04P109912	9.39072	https://www.genecards.org/cgi-bin/carddisp.pl?gene=EGF
BNIP3L	BCL2 Interacting Protein 3 Like	Protein Coding	O60238	47	GC08P026383	9.3905	https://www.genecards.org/cgi-bin/carddisp.pl?gene=BNIP3L
TREM2	Triggering Receptor Expressed On Myeloid Cells 2	Protein Coding	Q9NZC2	53	GC06M093978	9.38802	https://www.genecards.org/cgi-bin/carddisp.pl?gene=TREM2
TRAK1	Trafficking Kinesin Protein 1	Protein Coding	Q9UPV9	48	GC03P042047	9.38791	https://www.genecards.org/cgi-bin/carddisp.pl?gene=TRAK1
TG	Thyroglobulin	Protein Coding	P01266	53	GC08P132866	9.38155	https://www.genecards.org/cgi-bin/carddisp.pl?gene=TG
TFAMP1	Transcription Factor A, Mitochondrial Pseudogene 1	Pseudogene		13	GC07P001614	9.37769	https://www.genecards.org/cgi-bin/carddisp.pl?gene=TFAMP1
AMACR	Alpha-Methylacyl-CoA Racemase	Protein Coding	Q9UHK6	54	GC05M033986	9.35839	https://www.genecards.org/cgi-bin/carddisp.pl?gene=AMACR
MYOC	Myocilin	Protein Coding	Q99972	50	GC01M171604	9.3581	https://www.genecards.org/cgi-bin/carddisp.pl?gene=MYOC
SERPINC1	Serpin Family C Member 1	Protein Coding	P01008	59	GC01M174949	9.35612	https://www.genecards.org/cgi-bin/carddisp.pl?gene=SERPINC1
PRICKLE3	Prickle Planar Cell Polarity Protein 3	Protein Coding	O43900	45	GC0XM049725	9.35589	https://www.genecards.org/cgi-bin/carddisp.pl?gene=PRICKLE3
SLC25A36	Solute Carrier Family 25 Member 36	Protein Coding	Q96CQ1	45	GC03P140941	9.35372	https://www.genecards.org/cgi-bin/carddisp.pl?gene=SLC25A36
GATM	Glycine Amidinotransferase	Protein Coding	P50440	54	GC15M045361	9.34976	https://www.genecards.org/cgi-bin/carddisp.pl?gene=GATM
FGF23	Fibroblast Growth Factor 23	Protein Coding	Q9GZV9	55	GC12M004368	9.34624	https://www.genecards.org/cgi-bin/carddisp.pl?gene=FGF23
ACOX1	Acyl-CoA Oxidase 1	Protein Coding	Q15067	54	GC17M075941	9.34511	https://www.genecards.org/cgi-bin/carddisp.pl?gene=ACOX1
UCHL1	Ubiquitin C-Terminal Hydrolase L1	Protein Coding	P09936	61	GC04P041256	9.33773	https://www.genecards.org/cgi-bin/carddisp.pl?gene=UCHL1
NQO1	NAD(P)H Quinone Dehydrogenase 1	Protein Coding	P15559	56	GC16M069706	9.3377	https://www.genecards.org/cgi-bin/carddisp.pl?gene=NQO1
DNAJC15	DnaJ Heat Shock Protein Family (Hsp40) Member C15	Protein Coding	Q9Y5T4	42	GC13P043023	9.33412	https://www.genecards.org/cgi-bin/carddisp.pl?gene=DNAJC15
HAX1	HCLS1 Associated Protein X-1	Protein Coding	O00165	51	GC01P164481	9.3278	https://www.genecards.org/cgi-bin/carddisp.pl?gene=HAX1
VAPB	VAMP Associated Protein B And C	Protein Coding	O95292	53	GC20P058389	9.32115	https://www.genecards.org/cgi-bin/carddisp.pl?gene=VAPB
GLDC	Glycine Decarboxylase	Protein Coding	P23378	55	GC09M006522	9.32055	https://www.genecards.org/cgi-bin/carddisp.pl?gene=GLDC
INSR	Insulin Receptor	Protein Coding	P06213	62	GC19M007112	9.32025	https://www.genecards.org/cgi-bin/carddisp.pl?gene=INSR
PRKCE	Protein Kinase C Epsilon	Protein Coding	Q02156	56	GC02P045651	9.31712	https://www.genecards.org/cgi-bin/carddisp.pl?gene=PRKCE
CEP89	Centrosomal Protein 89	Protein Coding	Q96ST8	43	GC19M092648	9.30377	https://www.genecards.org/cgi-bin/carddisp.pl?gene=CEP89
NAGS	N-Acetylglutamate Synthase	Protein Coding	Q8N159	50	GC17P044004	9.29544	https://www.genecards.org/cgi-bin/carddisp.pl?gene=NAGS
TMEM177	Transmembrane Protein 177	Protein Coding	Q53S58	38	GC02P119679	9.29047	https://www.genecards.org/cgi-bin/carddisp.pl?gene=TMEM177
HCCS	Holocytochrome C Synthase	Protein Coding	P53701	50	GC0XP011111	9.28808	https://www.genecards.org/cgi-bin/carddisp.pl?gene=HCCS
RIGI	RNA Sensor RIG-I	Protein Coding	O95786	56	GC09M032525	9.28567	https://www.genecards.org/cgi-bin/carddisp.pl?gene=RIGI
ARG2	Arginase 2	Protein Coding	P78540	54	GC14P067619	9.28517	https://www.genecards.org/cgi-bin/carddisp.pl?gene=ARG2
HNRNPA1	Heterogeneous Nuclear Ribonucleoprotein A1	Protein Coding	P09651	56	GC12P054280	9.27859	https://www.genecards.org/cgi-bin/carddisp.pl?gene=HNRNPA1
HLA-DPB1	Major Histocompatibility Complex, Class II, DP Beta 1	Protein Coding	P04440	53	GC06P134859	9.27248	https://www.genecards.org/cgi-bin/carddisp.pl?gene=HLA-DPB1
PRKG1	Protein Kinase CGMP-Dependent 1	Protein Coding	Q13976	59	GC10P050991	9.26474	https://www.genecards.org/cgi-bin/carddisp.pl?gene=PRKG1
LHX4	LIM Homeobox 4	Protein Coding	Q969G2	50	GC01P180230	9.26111	https://www.genecards.org/cgi-bin/carddisp.pl?gene=LHX4
ABCA1	ATP Binding Cassette Subfamily A Member 1	Protein Coding	O95477	58	GC09M104781	9.25596	https://www.genecards.org/cgi-bin/carddisp.pl?gene=ABCA1
STAT2	Signal Transducer And Activator Of Transcription 2	Protein Coding	P52630	57	GC12M056341	9.24695	https://www.genecards.org/cgi-bin/carddisp.pl?gene=STAT2
BBS1	Bardet-Biedl Syndrome 1	Protein Coding	Q8NFJ9	48	GC11P089185	9.24526	https://www.genecards.org/cgi-bin/carddisp.pl?gene=BBS1
BDH1	3-Hydroxybutyrate Dehydrogenase 1	Protein Coding	Q02338	52	GC03M197529	9.24381	https://www.genecards.org/cgi-bin/carddisp.pl?gene=BDH1
P2RX7	Purinergic Receptor P2X 7	Protein Coding	Q99572	55	GC12P133258	9.2342	https://www.genecards.org/cgi-bin/carddisp.pl?gene=P2RX7
PRPF31	Pre-MRNA Processing Factor 31	Protein Coding	Q8WWY3	52	GC19P113671	9.2335	https://www.genecards.org/cgi-bin/carddisp.pl?gene=PRPF31
ERCC6	ERCC Excision Repair 6, Chromatin Remodeling Factor	Protein Coding	Q03468	54	GC10M049454	9.23248	https://www.genecards.org/cgi-bin/carddisp.pl?gene=ERCC6
HMGCR	3-Hydroxy-3-Methylglutaryl-CoA Reductase	Protein Coding	P04035	56	GC05P075336	9.23176	https://www.genecards.org/cgi-bin/carddisp.pl?gene=HMGCR
CORO1A	Coronin 1A	Protein Coding	P31146	53	GC16P081586	9.22952	https://www.genecards.org/cgi-bin/carddisp.pl?gene=CORO1A
TUFMP1	Tu Translation Elongation Factor, Mitochondrial Pseudogene 1	Pseudogene		10	GC17M076208	9.22051	https://www.genecards.org/cgi-bin/carddisp.pl?gene=TUFMP1
SLC52A2	Solute Carrier Family 52 Member 2	Protein Coding	Q9HAB3	46	GC08P144333	9.21603	https://www.genecards.org/cgi-bin/carddisp.pl?gene=SLC52A2
DNM2	Dynamin 2	Protein Coding	P50570	58	GC19P010718	9.20824	https://www.genecards.org/cgi-bin/carddisp.pl?gene=DNM2
HIGD1A	HIG1 Hypoxia Inducible Domain Family Member 1A	Protein Coding	Q9Y241	45	GC03M042782	9.20584	https://www.genecards.org/cgi-bin/carddisp.pl?gene=HIGD1A
PDGFRB	Platelet Derived Growth Factor Receptor Beta	Protein Coding	P09619	62	GC05M150113	9.20245	https://www.genecards.org/cgi-bin/carddisp.pl?gene=PDGFRB
IFNA1	Interferon Alpha 1	Protein Coding	P01562	48	GC09P021770	9.20198	https://www.genecards.org/cgi-bin/carddisp.pl?gene=IFNA1
MSRA	Methionine Sulfoxide Reductase A	Protein Coding	Q9UJ68	49	GC08P010054	9.18971	https://www.genecards.org/cgi-bin/carddisp.pl?gene=MSRA
GIGYF2	GRB10 Interacting GYF Protein 2	Protein Coding	Q6Y7W6	50	GC02P232815	9.18551	https://www.genecards.org/cgi-bin/carddisp.pl?gene=GIGYF2
MRPL57P6	Mitochondrial Ribosomal Protein L57 Pseudogene 6	Pseudogene		8	GC05P163039	9.17043	https://www.genecards.org/cgi-bin/carddisp.pl?gene=MRPL57P6
MIR193B	MicroRNA 193b	RNA Gene		28	GC16P080722	9.16477	https://www.genecards.org/cgi-bin/carddisp.pl?gene=MIR193B
ACSF3	Acyl-CoA Synthetase Family Member 3	Protein Coding	Q4G176	51	GC16P089088	9.16424	https://www.genecards.org/cgi-bin/carddisp.pl?gene=ACSF3
F3	Coagulation Factor III, Tissue Factor	Protein Coding	P13726	54	GC01M094873	9.16284	https://www.genecards.org/cgi-bin/carddisp.pl?gene=F3
PIK3CD	Phosphatidylinositol-4,5-Bisphosphate 3-Kinase Catalytic Subunit Delta	Protein Coding	O00329	61	GC01P039534	9.16046	https://www.genecards.org/cgi-bin/carddisp.pl?gene=PIK3CD
BBS2	Bardet-Biedl Syndrome 2	Protein Coding	Q9BXC9	50	GC16M056467	9.15864	https://www.genecards.org/cgi-bin/carddisp.pl?gene=BBS2
APAF1	Apoptotic Peptidase Activating Factor 1	Protein Coding	O14727	56	GC12P098645	9.14587	https://www.genecards.org/cgi-bin/carddisp.pl?gene=APAF1
RPGR	Retinitis Pigmentosa GTPase Regulator	Protein Coding	Q92834	51	GC0XM038269	9.1425	https://www.genecards.org/cgi-bin/carddisp.pl?gene=RPGR
PDK4	Pyruvate Dehydrogenase Kinase 4	Protein Coding	Q16654	52	GC07M095583	9.13401	https://www.genecards.org/cgi-bin/carddisp.pl?gene=PDK4
CMPK2	Cytidine/Uridine Monophosphate Kinase 2	Protein Coding	Q5EBM0	39	GC02M006834	9.12075	https://www.genecards.org/cgi-bin/carddisp.pl?gene=CMPK2
PDE12	Phosphodiesterase 12	Protein Coding	Q6L8Q7	44	GC03P057556	9.11769	https://www.genecards.org/cgi-bin/carddisp.pl?gene=PDE12
GRM1	Glutamate Metabotropic Receptor 1	Protein Coding	Q13255	59	GC06P145973	9.117	https://www.genecards.org/cgi-bin/carddisp.pl?gene=GRM1
ITGA4	Integrin Subunit Alpha 4	Protein Coding	P13612	57	GC02P181467	9.11435	https://www.genecards.org/cgi-bin/carddisp.pl?gene=ITGA4
GPX4	Glutathione Peroxidase 4	Protein Coding	P36969	56	GC19P001103	9.10151	https://www.genecards.org/cgi-bin/carddisp.pl?gene=GPX4
EIF2AK3	Eukaryotic Translation Initiation Factor 2 Alpha Kinase 3	Protein Coding	Q9NZJ5	58	GC02M088556	9.09036	https://www.genecards.org/cgi-bin/carddisp.pl?gene=EIF2AK3
BSCL2	BSCL2 Lipid Droplet Biogenesis Associated, Seipin	Protein Coding	Q96G97	52	GC11M125248	9.08848	https://www.genecards.org/cgi-bin/carddisp.pl?gene=BSCL2
SNORD15A	Small Nucleolar RNA, C/D Box 15A	RNA Gene		23	GC11P075400	9.08213	https://www.genecards.org/cgi-bin/carddisp.pl?gene=SNORD15A
CD40	CD40 Molecule	Protein Coding	P25942	59	GC20P046118	9.07988	https://www.genecards.org/cgi-bin/carddisp.pl?gene=CD40
GCK	Glucokinase	Protein Coding	P35557	58	GC07M045340	9.07526	https://www.genecards.org/cgi-bin/carddisp.pl?gene=GCK
ERBB4	Erb-B2 Receptor Tyrosine Kinase 4	Protein Coding	Q15303	63	GC02M211375	9.07457	https://www.genecards.org/cgi-bin/carddisp.pl?gene=ERBB4
CRYAB	Crystallin Alpha B	Protein Coding	P02511	55	GC11M111908	9.06393	https://www.genecards.org/cgi-bin/carddisp.pl?gene=CRYAB
DIAPH1	Diaphanous Related Formin 1	Protein Coding	O60610	55	GC05M141516	9.0602	https://www.genecards.org/cgi-bin/carddisp.pl?gene=DIAPH1
CALM2	Calmodulin 2	Protein Coding	P0DP24	53	GC02M047160	9.04168	https://www.genecards.org/cgi-bin/carddisp.pl?gene=CALM2
NPY	Neuropeptide Y	Protein Coding	P01303	53	GC07P024290	9.03927	https://www.genecards.org/cgi-bin/carddisp.pl?gene=NPY
GATA4	GATA Binding Protein 4	Protein Coding	P43694	58	GC08P011676	9.03545	https://www.genecards.org/cgi-bin/carddisp.pl?gene=GATA4
NTRK1	Neurotrophic Receptor Tyrosine Kinase 1	Protein Coding	P04629	58	GC01P156815	9.03306	https://www.genecards.org/cgi-bin/carddisp.pl?gene=NTRK1
PVT1	Pvt1 Oncogene	RNA Gene		32	GC08P128109	9.03187	https://www.genecards.org/cgi-bin/carddisp.pl?gene=PVT1
IDH3G	Isocitrate Dehydrogenase (NAD(+)) 3 Non-Catalytic Subunit Gamma	Protein Coding	P51553	47	GC0XM153785	9.03119	https://www.genecards.org/cgi-bin/carddisp.pl?gene=IDH3G
NDUFB2	NADH:Ubiquinone Oxidoreductase Subunit B2	Protein Coding	O95178	42	GC07P140690	9.02465	https://www.genecards.org/cgi-bin/carddisp.pl?gene=NDUFB2
IL18	Interleukin 18	Protein Coding	Q14116	53	GC11M112143	9.02365	https://www.genecards.org/cgi-bin/carddisp.pl?gene=IL18
PTPRC	Protein Tyrosine Phosphatase Receptor Type C	Protein Coding	P08575	61	GC01P198607	9.02141	https://www.genecards.org/cgi-bin/carddisp.pl?gene=PTPRC
B2M	Beta-2-Microglobulin	Protein Coding	P61769	59	GC15P044711	9.01362	https://www.genecards.org/cgi-bin/carddisp.pl?gene=B2M
COL4A4	Collagen Type IV Alpha 4 Chain	Protein Coding	P53420	52	GC02M226973	9.01031	https://www.genecards.org/cgi-bin/carddisp.pl?gene=COL4A4
CLCNKB	Chloride Voltage-Gated Channel Kb	Protein Coding	P51801	51	GC01P040859	9.00852	https://www.genecards.org/cgi-bin/carddisp.pl?gene=CLCNKB
SIGMAR1	Sigma Non-Opioid Intracellular Receptor 1	Protein Coding	Q99720	55	GC09M034634	9.00349	https://www.genecards.org/cgi-bin/carddisp.pl?gene=SIGMAR1
PON1	Paraoxonase 1	Protein Coding	P27169	56	GC07M095297	9.00095	https://www.genecards.org/cgi-bin/carddisp.pl?gene=PON1
BCR	BCR Activator Of RhoGEF And GTPase	Protein Coding	P11274	60	GC22P023179	8.98621	https://www.genecards.org/cgi-bin/carddisp.pl?gene=BCR
KCNQ1OT1	KCNQ1 Opposite Strand/Antisense Transcript 1	RNA Gene		34	GC11M011926	8.98116	https://www.genecards.org/cgi-bin/carddisp.pl?gene=KCNQ1OT1
GBE1	1,4-Alpha-Glucan Branching Enzyme 1	Protein Coding	Q04446	53	GC03M081489	8.976	https://www.genecards.org/cgi-bin/carddisp.pl?gene=GBE1
UQCR11	Ubiquinol-Cytochrome C Reductase, Complex III Subunit XI	Protein Coding	O14957	43	GC19M001597	8.97482	https://www.genecards.org/cgi-bin/carddisp.pl?gene=UQCR11
PIEZO1	Piezo Type Mechanosensitive Ion Channel Component 1 (Er Blood Group)	Protein Coding	Q92508	48	GC16M088715	8.97471	https://www.genecards.org/cgi-bin/carddisp.pl?gene=PIEZO1
GRIN1	Glutamate Ionotropic Receptor NMDA Type Subunit 1	Protein Coding	Q05586	59	GC09P137138	8.96956	https://www.genecards.org/cgi-bin/carddisp.pl?gene=GRIN1
OGT	O-Linked N-Acetylglucosamine (GlcNAc) Transferase	Protein Coding	O15294	55	GC0XP071735	8.96653	https://www.genecards.org/cgi-bin/carddisp.pl?gene=OGT
GLE1	GLE1 RNA Export Mediator	Protein Coding	Q53GS7	51	GC09P128504	8.96379	https://www.genecards.org/cgi-bin/carddisp.pl?gene=GLE1
MYL2	Myosin Light Chain 2	Protein Coding	P10916	57	GC12M110910	8.95597	https://www.genecards.org/cgi-bin/carddisp.pl?gene=MYL2
SNAP25	Synaptosome Associated Protein 25	Protein Coding	P60880	58	GC20P010224	8.95139	https://www.genecards.org/cgi-bin/carddisp.pl?gene=SNAP25
ESRRA	Estrogen Related Receptor Alpha	Protein Coding	P11474	54	GC11P064305	8.94249	https://www.genecards.org/cgi-bin/carddisp.pl?gene=ESRRA
PTGS2	Prostaglandin-Endoperoxide Synthase 2	Protein Coding	P35354	58	GC01M186671	8.94089	https://www.genecards.org/cgi-bin/carddisp.pl?gene=PTGS2
PRKAA1	Protein Kinase AMP-Activated Catalytic Subunit Alpha 1	Protein Coding	Q13131	55	GC05M040759	8.94015	https://www.genecards.org/cgi-bin/carddisp.pl?gene=PRKAA1
VPS35	VPS35 Retromer Complex Component	Protein Coding	Q96QK1	52	GC16M047289	8.93851	https://www.genecards.org/cgi-bin/carddisp.pl?gene=VPS35
RNF213	Ring Finger Protein 213	Protein Coding	Q63HN8	48	GC17P080260	8.93216	https://www.genecards.org/cgi-bin/carddisp.pl?gene=RNF213
HLA-A	Major Histocompatibility Complex, Class I, A	Protein Coding	P04439	54	GC06P134779	8.93084	https://www.genecards.org/cgi-bin/carddisp.pl?gene=HLA-A
ITPR3	Inositol 1,4,5-Trisphosphate Receptor Type 3	Protein Coding	Q14573	55	GC06P033620	8.93048	https://www.genecards.org/cgi-bin/carddisp.pl?gene=ITPR3
TGFBR1	Transforming Growth Factor Beta Receptor 1	Protein Coding	P36897	62	GC09P100712	8.92475	https://www.genecards.org/cgi-bin/carddisp.pl?gene=TGFBR1
MMP9	Matrix Metallopeptidase 9	Protein Coding	P14780	62	GC20P046008	8.92427	https://www.genecards.org/cgi-bin/carddisp.pl?gene=MMP9
TBP	TATA-Box Binding Protein	Protein Coding	P20226	58	GC06P170554	8.92357	https://www.genecards.org/cgi-bin/carddisp.pl?gene=TBP
CAV3	Caveolin 3	Protein Coding	P56539	52	GC03P008733	8.92315	https://www.genecards.org/cgi-bin/carddisp.pl?gene=CAV3
POR	Cytochrome P450 Oxidoreductase	Protein Coding	P16435	55	GC07P075899	8.92029	https://www.genecards.org/cgi-bin/carddisp.pl?gene=POR
ATXN10	Ataxin 10	Protein Coding	Q9UBB4	51	GC22P070816	8.91293	https://www.genecards.org/cgi-bin/carddisp.pl?gene=ATXN10
KCNE1	Potassium Voltage-Gated Channel Subfamily E Regulatory Subunit 1	Protein Coding	P15382	54	GC21M034446	8.9112	https://www.genecards.org/cgi-bin/carddisp.pl?gene=KCNE1
LOC112529895	H3K27ac HESC Enhancer GRCh37_chr17:10600651-10601475	Functional Element		3	GC17P111277	8.91029	https://www.genecards.org/cgi-bin/carddisp.pl?gene=LOC112529895
TRAF3	TNF Receptor Associated Factor 3	Protein Coding	Q13114	55	GC14P115798	8.90838	https://www.genecards.org/cgi-bin/carddisp.pl?gene=TRAF3
SFXN3	Sideroflexin 3	Protein Coding	Q9BWM7	45	GC10P101031	8.90816	https://www.genecards.org/cgi-bin/carddisp.pl?gene=SFXN3
ADCK1	AarF Domain Containing Kinase 1	Protein Coding	Q86TW2	40	GC14P077800	8.90776	https://www.genecards.org/cgi-bin/carddisp.pl?gene=ADCK1
PUF60	Poly(U) Binding Splicing Factor 60	Protein Coding	Q9UHX1	50	GC08M143816	8.90432	https://www.genecards.org/cgi-bin/carddisp.pl?gene=PUF60
CDC42	Cell Division Cycle 42	Protein Coding	P60953	59	GC01P022052	8.8921	https://www.genecards.org/cgi-bin/carddisp.pl?gene=CDC42
USP30	Ubiquitin Specific Peptidase 30	Protein Coding	Q70CQ3	45	GC12P109027	8.88782	https://www.genecards.org/cgi-bin/carddisp.pl?gene=USP30
HTR1A	5-Hydroxytryptamine Receptor 1A	Protein Coding	P08908	55	GC05M063960	8.88603	https://www.genecards.org/cgi-bin/carddisp.pl?gene=HTR1A
ACTB	Actin Beta	Protein Coding	P60709	58	GC07M005527	8.87832	https://www.genecards.org/cgi-bin/carddisp.pl?gene=ACTB
LINC01554	Long Intergenic Non-Protein Coding RNA 1554	RNA Gene	Q52M75	27	GC05P095838	8.87713	https://www.genecards.org/cgi-bin/carddisp.pl?gene=LINC01554
PML	PML Nuclear Body Scaffold	Protein Coding	P29590	54	GC15P073994	8.87677	https://www.genecards.org/cgi-bin/carddisp.pl?gene=PML
PREPL	Prolyl Endopeptidase Like	Protein Coding	Q4J6C6	50	GC02M044316	8.87584	https://www.genecards.org/cgi-bin/carddisp.pl?gene=PREPL
F5	Coagulation Factor V	Protein Coding	P12259	56	GC01M169511	8.8737	https://www.genecards.org/cgi-bin/carddisp.pl?gene=F5
SOX10	SRY-Box Transcription Factor 10	Protein Coding	P56693	54	GC22M078834	8.86717	https://www.genecards.org/cgi-bin/carddisp.pl?gene=SOX10
ACSL4	Acyl-CoA Synthetase Long Chain Family Member 4	Protein Coding	O60488	53	GC0XM109624	8.86667	https://www.genecards.org/cgi-bin/carddisp.pl?gene=ACSL4
FTO	FTO Alpha-Ketoglutarate Dependent Dioxygenase	Protein Coding	Q9C0B1	55	GC16P082352	8.8625	https://www.genecards.org/cgi-bin/carddisp.pl?gene=FTO
CHD7	Chromodomain Helicase DNA Binding Protein 7	Protein Coding	Q9P2D1	54	GC08P060678	8.85912	https://www.genecards.org/cgi-bin/carddisp.pl?gene=CHD7
MIR598	MicroRNA 598	RNA Gene		22	GC08M011035	8.85756	https://www.genecards.org/cgi-bin/carddisp.pl?gene=MIR598
CHCHD7	Coiled-Coil-Helix-Coiled-Coil-Helix Domain Containing 7	Protein Coding	Q9BUK0	41	GC08P056211	8.85656	https://www.genecards.org/cgi-bin/carddisp.pl?gene=CHCHD7
CTCF	CCCTC-Binding Factor	Protein Coding	P49711	56	GC16P082860	8.85247	https://www.genecards.org/cgi-bin/carddisp.pl?gene=CTCF
CDKN1B	Cyclin Dependent Kinase Inhibitor 1B	Protein Coding	P46527	57	GC12P039206	8.84134	https://www.genecards.org/cgi-bin/carddisp.pl?gene=CDKN1B
CAV1	Caveolin 1	Protein Coding	Q03135	57	GC07P116524	8.81226	https://www.genecards.org/cgi-bin/carddisp.pl?gene=CAV1
ATP2A2	ATPase Sarcoplasmic/Endoplasmic Reticulum Ca2+ Transporting 2	Protein Coding	P16615	60	GC12P110280	8.80059	https://www.genecards.org/cgi-bin/carddisp.pl?gene=ATP2A2
FLNA	Filamin A	Protein Coding	P21333	57	GC0XM154348	8.79912	https://www.genecards.org/cgi-bin/carddisp.pl?gene=FLNA
SLC39A14	Solute Carrier Family 39 Member 14	Protein Coding	Q15043	52	GC08P022367	8.79712	https://www.genecards.org/cgi-bin/carddisp.pl?gene=SLC39A14
SFTA3	Surfactant Associated 3	RNA Gene	P0C7M3	39	GC14M036474	8.79681	https://www.genecards.org/cgi-bin/carddisp.pl?gene=SFTA3
HIGD2A	HIG1 Hypoxia Inducible Domain Family Member 2A	Protein Coding	Q9BW72	38	GC05P176388	8.79609	https://www.genecards.org/cgi-bin/carddisp.pl?gene=HIGD2A
BCKDK	Branched Chain Keto Acid Dehydrogenase Kinase	Protein Coding	O14874	52	GC16P081697	8.79581	https://www.genecards.org/cgi-bin/carddisp.pl?gene=BCKDK
AGXT2	Alanine--Glyoxylate Aminotransferase 2	Protein Coding	Q9BYV1	47	GC05M034998	8.79395	https://www.genecards.org/cgi-bin/carddisp.pl?gene=AGXT2
MMP2	Matrix Metallopeptidase 2	Protein Coding	P08253	61	GC16P082389	8.79254	https://www.genecards.org/cgi-bin/carddisp.pl?gene=MMP2
PRKCB	Protein Kinase C Beta	Protein Coding	P05771	58	GC16P081181	8.78976	https://www.genecards.org/cgi-bin/carddisp.pl?gene=PRKCB
GHRL	Ghrelin And Obestatin Prepropeptide	Protein Coding	Q9UBU3	50	GC03M010285	8.78769	https://www.genecards.org/cgi-bin/carddisp.pl?gene=GHRL
MRPL50P1	Mitochondrial Ribosomal Protein L50 Pseudogene 1	Pseudogene		8	GC02M035724	8.78672	https://www.genecards.org/cgi-bin/carddisp.pl?gene=MRPL50P1
VCAM1	Vascular Cell Adhesion Molecule 1	Protein Coding	P19320	55	GC01P100719	8.78655	https://www.genecards.org/cgi-bin/carddisp.pl?gene=VCAM1
FASTKD1	FAST Kinase Domains 1	Protein Coding	Q53R41	40	GC02M169529	8.78516	https://www.genecards.org/cgi-bin/carddisp.pl?gene=FASTKD1
PHGDH	Phosphoglycerate Dehydrogenase	Protein Coding	O43175	59	GC01P119660	8.78402	https://www.genecards.org/cgi-bin/carddisp.pl?gene=PHGDH
ATF4	Activating Transcription Factor 4	Protein Coding	P18848	55	GC22P039519	8.77704	https://www.genecards.org/cgi-bin/carddisp.pl?gene=ATF4
DTYMK	Deoxythymidylate Kinase	Protein Coding	P23919	51	GC02M241675	8.77532	https://www.genecards.org/cgi-bin/carddisp.pl?gene=DTYMK
IVNS1ABP	Influenza Virus NS1A Binding Protein	Protein Coding	Q9Y6Y0	51	GC01M185296	8.7676	https://www.genecards.org/cgi-bin/carddisp.pl?gene=IVNS1ABP
RPS6KB1	Ribosomal Protein S6 Kinase B1	Protein Coding	P23443	59	GC17P059893	8.75528	https://www.genecards.org/cgi-bin/carddisp.pl?gene=RPS6KB1
TFAMP2	Transcription Factor A, Mitochondrial Pseudogene 2	Pseudogene		8	GC11M109905	8.74997	https://www.genecards.org/cgi-bin/carddisp.pl?gene=TFAMP2
DEPDC5	DEP Domain Containing 5, GATOR1 Subcomplex Subunit	Protein Coding	O75140	51	GC22P031753	8.74984	https://www.genecards.org/cgi-bin/carddisp.pl?gene=DEPDC5
CNR1	Cannabinoid Receptor 1	Protein Coding	P21554	55	GC06M088139	8.74645	https://www.genecards.org/cgi-bin/carddisp.pl?gene=CNR1
RALA	RAS Like Proto-Oncogene A	Protein Coding	P11233	55	GC07P039622	8.74057	https://www.genecards.org/cgi-bin/carddisp.pl?gene=RALA
MC4R	Melanocortin 4 Receptor	Protein Coding	P32245	55	GC18M060371	8.73983	https://www.genecards.org/cgi-bin/carddisp.pl?gene=MC4R
NDUFB4	NADH:Ubiquinone Oxidoreductase Subunit B4	Protein Coding	O95168	44	GC03P120596	8.73801	https://www.genecards.org/cgi-bin/carddisp.pl?gene=NDUFB4
WRN	WRN RecQ Like Helicase	Protein Coding	Q14191	56	GC08P031033	8.73732	https://www.genecards.org/cgi-bin/carddisp.pl?gene=WRN
TRAPPC11	Trafficking Protein Particle Complex Subunit 11	Protein Coding	Q7Z392	45	GC04P183659	8.73468	https://www.genecards.org/cgi-bin/carddisp.pl?gene=TRAPPC11
PRKAG2	Protein Kinase AMP-Activated Non-Catalytic Subunit Gamma 2	Protein Coding	Q9UGJ0	56	GC07M151556	8.73421	https://www.genecards.org/cgi-bin/carddisp.pl?gene=PRKAG2
LGALS3	Galectin 3	Protein Coding	P17931	53	GC14P055124	8.73347	https://www.genecards.org/cgi-bin/carddisp.pl?gene=LGALS3
CYB5B	Cytochrome B5 Type B	Protein Coding	O43169	49	GC16P083003	8.73244	https://www.genecards.org/cgi-bin/carddisp.pl?gene=CYB5B
SAMMSON	Survival Associated Mitochondrial Melanoma Specific Oncogenic Non-Coding RNA	RNA Gene		22	GC03P069999	8.73124	https://www.genecards.org/cgi-bin/carddisp.pl?gene=SAMMSON
PRKAR1A	Protein Kinase CAMP-Dependent Type I Regulatory Subunit Alpha	Protein Coding	P10644	60	GC17P112990	8.7307	https://www.genecards.org/cgi-bin/carddisp.pl?gene=PRKAR1A
RHO	Rhodopsin	Protein Coding	P08100	56	GC03P139009	8.72639	https://www.genecards.org/cgi-bin/carddisp.pl?gene=RHO
SCN9A	Sodium Voltage-Gated Channel Alpha Subunit 9	Protein Coding	Q15858	56	GC02M166195	8.72382	https://www.genecards.org/cgi-bin/carddisp.pl?gene=SCN9A
FHIT	Fragile Histidine Triad Diadenosine Triphosphatase	Protein Coding	P49789	52	GC03M059747	8.72355	https://www.genecards.org/cgi-bin/carddisp.pl?gene=FHIT
RELN	Reelin	Protein Coding	P78509	53	GC07M103471	8.7222	https://www.genecards.org/cgi-bin/carddisp.pl?gene=RELN
MOV10	Mov10 RNA Helicase	Protein Coding	Q9HCE1	49	GC01P112673	8.72119	https://www.genecards.org/cgi-bin/carddisp.pl?gene=MOV10
LOC130008523	ATAC-STARR-Seq Lymphoblastoid Active Region 6847	Functional Element		5	GC12P098602	8.72102	https://www.genecards.org/cgi-bin/carddisp.pl?gene=LOC130008523
KCNA5	Potassium Voltage-Gated Channel Subfamily A Member 5	Protein Coding	P22460	54	GC12P005043	8.71231	https://www.genecards.org/cgi-bin/carddisp.pl?gene=KCNA5
SST	Somatostatin	Protein Coding	P61278	50	GC03M187668	8.70847	https://www.genecards.org/cgi-bin/carddisp.pl?gene=SST
MYPN	Myopalladin	Protein Coding	Q86TC9	50	GC10P068106	8.70717	https://www.genecards.org/cgi-bin/carddisp.pl?gene=MYPN
AFG1L	AFG1 Like ATPase	Protein Coding	Q8WV93	42	GC06P135908	8.70351	https://www.genecards.org/cgi-bin/carddisp.pl?gene=AFG1L
GIGYF1	GRB10 Interacting GYF Protein 1	Protein Coding	O75420	44	GC07M100679	8.70136	https://www.genecards.org/cgi-bin/carddisp.pl?gene=GIGYF1
PTPN22	Protein Tyrosine Phosphatase Non-Receptor Type 22	Protein Coding	Q9Y2R2	55	GC01M113813	8.70002	https://www.genecards.org/cgi-bin/carddisp.pl?gene=PTPN22
TLR2	Toll Like Receptor 2	Protein Coding	O60603	61	GC04P153684	8.69757	https://www.genecards.org/cgi-bin/carddisp.pl?gene=TLR2
CASP1	Caspase 1	Protein Coding	P29466	58	GC11M105025	8.69674	https://www.genecards.org/cgi-bin/carddisp.pl?gene=CASP1
ACAD10	Acyl-CoA Dehydrogenase Family Member 10	Protein Coding	Q6JQN1	44	GC12P111686	8.69659	https://www.genecards.org/cgi-bin/carddisp.pl?gene=ACAD10
TBL1XR1	TBL1X/Y Related 1	Protein Coding	Q9BZK7	54	GC03M177019	8.68177	https://www.genecards.org/cgi-bin/carddisp.pl?gene=TBL1XR1
SPTLC1	Serine Palmitoyltransferase Long Chain Base Subunit 1	Protein Coding	O15269	54	GC09M109404	8.67874	https://www.genecards.org/cgi-bin/carddisp.pl?gene=SPTLC1
SPART	Spartin	Protein Coding	Q8N0X7	48	GC13M040062	8.67711	https://www.genecards.org/cgi-bin/carddisp.pl?gene=SPART
GP1BA	Glycoprotein Ib Platelet Subunit Alpha	Protein Coding	P07359	56	GC17P004932	8.67671	https://www.genecards.org/cgi-bin/carddisp.pl?gene=GP1BA
ATP8B1	ATPase Phospholipid Transporting 8B1	Protein Coding	O43520	48	GC18M057646	8.67617	https://www.genecards.org/cgi-bin/carddisp.pl?gene=ATP8B1
ITGB3	Integrin Subunit Beta 3	Protein Coding	P05106	61	GC17P112532	8.67243	https://www.genecards.org/cgi-bin/carddisp.pl?gene=ITGB3
FOS	Fos Proto-Oncogene, AP-1 Transcription Factor Subunit	Protein Coding	P01100	59	GC14P075278	8.67094	https://www.genecards.org/cgi-bin/carddisp.pl?gene=FOS
BMP6	Bone Morphogenetic Protein 6	Protein Coding	P22004	53	GC06P007726	8.66901	https://www.genecards.org/cgi-bin/carddisp.pl?gene=BMP6
CAMK2G	Calcium/Calmodulin Dependent Protein Kinase II Gamma	Protein Coding	Q13555	58	GC10M073812	8.66749	https://www.genecards.org/cgi-bin/carddisp.pl?gene=CAMK2G
ATP1A2	ATPase Na+/K+ Transporting Subunit Alpha 2	Protein Coding	P50993	57	GC01P160115	8.66508	https://www.genecards.org/cgi-bin/carddisp.pl?gene=ATP1A2
MRPS36P2	Mitochondrial Ribosomal Protein S36 Pseudogene 2	Pseudogene		9	GC04P186900	8.6649	https://www.genecards.org/cgi-bin/carddisp.pl?gene=MRPS36P2
PCNA	Proliferating Cell Nuclear Antigen	Protein Coding	P12004	59	GC20M005114	8.6607	https://www.genecards.org/cgi-bin/carddisp.pl?gene=PCNA
NEK1	NIMA Related Kinase 1	Protein Coding	Q96PY6	52	GC04M169393	8.66037	https://www.genecards.org/cgi-bin/carddisp.pl?gene=NEK1
CALM3	Calmodulin 3	Protein Coding	P0DP25	51	GC19P046601	8.6603	https://www.genecards.org/cgi-bin/carddisp.pl?gene=CALM3
ALDH3A2	Aldehyde Dehydrogenase 3 Family Member A2	Protein Coding	P51648	54	GC17P019648	8.65283	https://www.genecards.org/cgi-bin/carddisp.pl?gene=ALDH3A2
IKBKG	Inhibitor Of Nuclear Factor Kappa B Kinase Regulatory Subunit Gamma	Protein Coding	Q9Y6K9	56	GC0XP154541	8.65278	https://www.genecards.org/cgi-bin/carddisp.pl?gene=IKBKG
RAC2	Rac Family Small GTPase 2	Protein Coding	P15153	59	GC22M077096	8.65196	https://www.genecards.org/cgi-bin/carddisp.pl?gene=RAC2
PRKCZ	Protein Kinase C Zeta	Protein Coding	Q05513	57	GC01P020522	8.65157	https://www.genecards.org/cgi-bin/carddisp.pl?gene=PRKCZ
GJB1	Gap Junction Protein Beta 1	Protein Coding	P08034	55	GC0XP071212	8.64367	https://www.genecards.org/cgi-bin/carddisp.pl?gene=GJB1
AMBP	Alpha-1-Microglobulin/Bikunin Precursor	Protein Coding	P02760	52	GC09M114060	8.64289	https://www.genecards.org/cgi-bin/carddisp.pl?gene=AMBP
SIL1	SIL1 Nucleotide Exchange Factor	Protein Coding	Q9H173	50	GC05M138975	8.64124	https://www.genecards.org/cgi-bin/carddisp.pl?gene=SIL1
RCC1L	RCC1 Like	Protein Coding	Q96I51	37	GC07M075243	8.64058	https://www.genecards.org/cgi-bin/carddisp.pl?gene=RCC1L
SLC25A41	Solute Carrier Family 25 Member 41	Protein Coding	Q8N5S1	37	GC19M006426	8.63986	https://www.genecards.org/cgi-bin/carddisp.pl?gene=SLC25A41
MKS1	MKS Transition Zone Complex Subunit 1	Protein Coding	Q9NXB0	50	GC17M058205	8.63652	https://www.genecards.org/cgi-bin/carddisp.pl?gene=MKS1
STUB1	STIP1 Homology And U-Box Containing Protein 1	Protein Coding	Q9UNE7	54	GC16P080174	8.63012	https://www.genecards.org/cgi-bin/carddisp.pl?gene=STUB1
OTOF	Otoferlin	Protein Coding	Q9HC10	49	GC02M026538	8.62013	https://www.genecards.org/cgi-bin/carddisp.pl?gene=OTOF
FANCA	FA Complementation Group A	Protein Coding	O15360	59	GC16M090078	8.61946	https://www.genecards.org/cgi-bin/carddisp.pl?gene=FANCA
SMC1A	Structural Maintenance Of Chromosomes 1A	Protein Coding	Q14683	56	GC0XM053374	8.60874	https://www.genecards.org/cgi-bin/carddisp.pl?gene=SMC1A
CSF3	Colony Stimulating Factor 3	Protein Coding	P09919	50	GC17P040015	8.60439	https://www.genecards.org/cgi-bin/carddisp.pl?gene=CSF3
PROM1	Prominin 1	Protein Coding	O43490	55	GC04M015965	8.59781	https://www.genecards.org/cgi-bin/carddisp.pl?gene=PROM1
MIR539	MicroRNA 539	RNA Gene		23	GC14P116774	8.59323	https://www.genecards.org/cgi-bin/carddisp.pl?gene=MIR539
IFI27	Interferon Alpha Inducible Protein 27	Protein Coding	P40305	47	GC14P094104	8.59291	https://www.genecards.org/cgi-bin/carddisp.pl?gene=IFI27
FBXW7	F-Box And WD Repeat Domain Containing 7	Protein Coding	Q969H0	54	GC04M152321	8.58528	https://www.genecards.org/cgi-bin/carddisp.pl?gene=FBXW7
CAPN3	Calpain 3	Protein Coding	P20807	56	GC15P042359	8.58031	https://www.genecards.org/cgi-bin/carddisp.pl?gene=CAPN3
FLVCR1	FLVCR Choline And Heme Transporter 1	Protein Coding	Q9Y5Y0	48	GC01P212858	8.57268	https://www.genecards.org/cgi-bin/carddisp.pl?gene=FLVCR1
VPS13A	Vacuolar Protein Sorting 13 Homolog A	Protein Coding	Q96RL7	50	GC09P077177	8.56907	https://www.genecards.org/cgi-bin/carddisp.pl?gene=VPS13A
IRS1	Insulin Receptor Substrate 1	Protein Coding	P35568	56	GC02M226731	8.56892	https://www.genecards.org/cgi-bin/carddisp.pl?gene=IRS1
G6PD	Glucose-6-Phosphate Dehydrogenase	Protein Coding	P11413	59	GC0XM154598	8.56608	https://www.genecards.org/cgi-bin/carddisp.pl?gene=G6PD
PDK3	Pyruvate Dehydrogenase Kinase 3	Protein Coding	Q15120	52	GC0XP024465	8.56343	https://www.genecards.org/cgi-bin/carddisp.pl?gene=PDK3
TF	Transferrin	Protein Coding	P02787	59	GC03P139072	8.5554	https://www.genecards.org/cgi-bin/carddisp.pl?gene=TF
SLC25A30	Solute Carrier Family 25 Member 30	Protein Coding	Q5SVS4	38	GC13M045393	8.55288	https://www.genecards.org/cgi-bin/carddisp.pl?gene=SLC25A30
DCTN1	Dynactin Subunit 1	Protein Coding	Q14203	56	GC02M074361	8.54959	https://www.genecards.org/cgi-bin/carddisp.pl?gene=DCTN1
NOTCH2	Notch Receptor 2	Protein Coding	Q04721	59	GC01M119911	8.5434	https://www.genecards.org/cgi-bin/carddisp.pl?gene=NOTCH2
MIR95	MicroRNA 95	RNA Gene		25	GC04M008013	8.54049	https://www.genecards.org/cgi-bin/carddisp.pl?gene=MIR95
CISD1	CDGSH Iron Sulfur Domain 1	Protein Coding	Q9NZ45	45	GC10P058269	8.53961	https://www.genecards.org/cgi-bin/carddisp.pl?gene=CISD1
FASN	Fatty Acid Synthase	Protein Coding	P49327	58	GC17M082078	8.5388	https://www.genecards.org/cgi-bin/carddisp.pl?gene=FASN
ELP1	Elongator Acetyltransferase Complex Subunit 1	Protein Coding	O95163	52	GC09M109845	8.53643	https://www.genecards.org/cgi-bin/carddisp.pl?gene=ELP1
PEX19	Peroxisomal Biogenesis Factor 19	Protein Coding	P40855	52	GC01M160276	8.53526	https://www.genecards.org/cgi-bin/carddisp.pl?gene=PEX19
KCNH2	Potassium Voltage-Gated Channel Subfamily H Member 2	Protein Coding	Q12809	59	GC07M150944	8.52805	https://www.genecards.org/cgi-bin/carddisp.pl?gene=KCNH2
FLCN	Folliculin	Protein Coding	Q8NFG4	51	GC17M017212	8.52713	https://www.genecards.org/cgi-bin/carddisp.pl?gene=FLCN
TPO	Thyroid Peroxidase	Protein Coding	P07202	56	GC02P001374	8.52584	https://www.genecards.org/cgi-bin/carddisp.pl?gene=TPO
BCYRN1	Brain Cytoplasmic RNA 1	RNA Gene		26	GC02P047253	8.52085	https://www.genecards.org/cgi-bin/carddisp.pl?gene=BCYRN1
CYP2C9	Cytochrome P450 Family 2 Subfamily C Member 9	Protein Coding	P11712	55	GC10P094938	8.51784	https://www.genecards.org/cgi-bin/carddisp.pl?gene=CYP2C9
DBH	Dopamine Beta-Hydroxylase	Protein Coding	P09172	60	GC09P133636	8.51696	https://www.genecards.org/cgi-bin/carddisp.pl?gene=DBH
CYP1B1	Cytochrome P450 Family 1 Subfamily B Member 1	Protein Coding	Q16678	56	GC02M038066	8.5156	https://www.genecards.org/cgi-bin/carddisp.pl?gene=CYP1B1
THBS1	Thrombospondin 1	Protein Coding	P07996	54	GC15P039581	8.51385	https://www.genecards.org/cgi-bin/carddisp.pl?gene=THBS1
BLM	BLM RecQ Like Helicase	Protein Coding	P54132	58	GC15P090717	8.51178	https://www.genecards.org/cgi-bin/carddisp.pl?gene=BLM
FANCD2	FA Complementation Group D2	Protein Coding	Q9BXW9	55	GC03P010026	8.50836	https://www.genecards.org/cgi-bin/carddisp.pl?gene=FANCD2
ITGB1	Integrin Subunit Beta 1	Protein Coding	P05556	58	GC10M035774	8.50686	https://www.genecards.org/cgi-bin/carddisp.pl?gene=ITGB1
MRPS35P3	Mitochondrial Ribosomal Protein S35 Pseudogene 3	Pseudogene		9	GC10P057982	8.50279	https://www.genecards.org/cgi-bin/carddisp.pl?gene=MRPS35P3
GDNF	Glial Cell Derived Neurotrophic Factor	Protein Coding	P39905	59	GC05M037812	8.50154	https://www.genecards.org/cgi-bin/carddisp.pl?gene=GDNF
VEGFA	Vascular Endothelial Growth Factor A	Protein Coding	P15692	57	GC06P043770	8.50009	https://www.genecards.org/cgi-bin/carddisp.pl?gene=VEGFA
TNFRSF1B	TNF Receptor Superfamily Member 1B	Protein Coding	P20333	57	GC01P040409	8.48264	https://www.genecards.org/cgi-bin/carddisp.pl?gene=TNFRSF1B
MATR3	Matrin 3	Protein Coding	P43243	52	GC05P139274	8.47796	https://www.genecards.org/cgi-bin/carddisp.pl?gene=MATR3
SYP	Synaptophysin	Protein Coding	P08247	55	GC0XM049187	8.47288	https://www.genecards.org/cgi-bin/carddisp.pl?gene=SYP
MIR451A	MicroRNA 451a	RNA Gene		25	GC17M028861	8.47171	https://www.genecards.org/cgi-bin/carddisp.pl?gene=MIR451A
DYSF	Dysferlin	Protein Coding	O75923	51	GC02P071453	8.46449	https://www.genecards.org/cgi-bin/carddisp.pl?gene=DYSF
IKBKB	Inhibitor Of Nuclear Factor Kappa B Kinase Subunit Beta	Protein Coding	O14920	62	GC08P042271	8.45888	https://www.genecards.org/cgi-bin/carddisp.pl?gene=IKBKB
CCR5	C-C Motif Chemokine Receptor 5	Protein Coding	P51681	56	GC03P057395	8.45887	https://www.genecards.org/cgi-bin/carddisp.pl?gene=CCR5
CD58	CD58 Molecule	Protein Coding	P19256	50	GC01M116514	8.45763	https://www.genecards.org/cgi-bin/carddisp.pl?gene=CD58
CC2D2A	Coiled-Coil And C2 Domain Containing 2A	Protein Coding	Q9P2K1	49	GC04P024665	8.45721	https://www.genecards.org/cgi-bin/carddisp.pl?gene=CC2D2A
ATP7A	ATPase Copper Transporting Alpha	Protein Coding	Q04656	55	GC0XP078165	8.45434	https://www.genecards.org/cgi-bin/carddisp.pl?gene=ATP7A
HSP90AB1	Heat Shock Protein 90 Alpha Family Class B Member 1	Protein Coding	P08238	58	GC06P044246	8.44843	https://www.genecards.org/cgi-bin/carddisp.pl?gene=HSP90AB1
KCNJ5	Potassium Inwardly Rectifying Channel Subfamily J Member 5	Protein Coding	P48544	56	GC11P128891	8.44671	https://www.genecards.org/cgi-bin/carddisp.pl?gene=KCNJ5
MSH6	MutS Homolog 6	Protein Coding	P52701	58	GC02P047695	8.43379	https://www.genecards.org/cgi-bin/carddisp.pl?gene=MSH6
SPATA18	Spermatogenesis Associated 18	Protein Coding	Q8TC71	40	GC04P052051	8.42537	https://www.genecards.org/cgi-bin/carddisp.pl?gene=SPATA18
RPA1	Replication Protein A1	Protein Coding	P27694	56	GC17P001829	8.42258	https://www.genecards.org/cgi-bin/carddisp.pl?gene=RPA1
MYO6	Myosin VI	Protein Coding	Q9UM54	51	GC06P075749	8.42019	https://www.genecards.org/cgi-bin/carddisp.pl?gene=MYO6
SLC30A10	Solute Carrier Family 30 Member 10	Protein Coding	Q6XR72	50	GC01M219685	8.41799	https://www.genecards.org/cgi-bin/carddisp.pl?gene=SLC30A10
P4HB	Prolyl 4-Hydroxylase Subunit Beta	Protein Coding	P07237	58	GC17M081843	8.41695	https://www.genecards.org/cgi-bin/carddisp.pl?gene=P4HB
UBC	Ubiquitin C	Protein Coding	P0CG48	53	GC12M124911	8.41312	https://www.genecards.org/cgi-bin/carddisp.pl?gene=UBC
NDUFA3	NADH:Ubiquinone Oxidoreductase Subunit A3	Protein Coding	O95167	44	GC19P054102	8.41296	https://www.genecards.org/cgi-bin/carddisp.pl?gene=NDUFA3
PWAR1	Prader Willi/Angelman Region RNA 1	RNA Gene		22	GC15P025135	8.41229	https://www.genecards.org/cgi-bin/carddisp.pl?gene=PWAR1
SLC4A1	Solute Carrier Family 4 Member 1 (Diego Blood Group)	Protein Coding	P02730	56	GC17M077847	8.40899	https://www.genecards.org/cgi-bin/carddisp.pl?gene=SLC4A1
YAP1	Yes1 Associated Transcriptional Regulator	Protein Coding	P46937	56	GC11P102110	8.40579	https://www.genecards.org/cgi-bin/carddisp.pl?gene=YAP1
USP45	Ubiquitin Specific Peptidase 45	Protein Coding	Q70EL2	46	GC06M099432	8.39874	https://www.genecards.org/cgi-bin/carddisp.pl?gene=USP45
DMPK	DM1 Protein Kinase	Protein Coding	Q09013	56	GC19M045769	8.39598	https://www.genecards.org/cgi-bin/carddisp.pl?gene=DMPK
ENSG00000249773	Novel Zinc Finger Protein 713 (ZNF713) And Mitochondrial Ribosomal Protein S17 (MRPS17) Protein	Protein Coding		9	GC07P060610	8.39153	https://www.genecards.org/cgi-bin/carddisp.pl?gene=ENSG00000249773
TGFBR2	Transforming Growth Factor Beta Receptor 2	Protein Coding	P37173	61	GC03P030623	8.39139	https://www.genecards.org/cgi-bin/carddisp.pl?gene=TGFBR2
RDH12	Retinol Dehydrogenase 12	Protein Coding	Q96NR8	53	GC14P067701	8.39075	https://www.genecards.org/cgi-bin/carddisp.pl?gene=RDH12
BECN1	Beclin 1	Protein Coding	Q14457	55	GC17M042810	8.38706	https://www.genecards.org/cgi-bin/carddisp.pl?gene=BECN1
TMC1	Transmembrane Channel Like 1	Protein Coding	Q8TDI8	48	GC09P072521	8.38536	https://www.genecards.org/cgi-bin/carddisp.pl?gene=TMC1
FOXG1	Forkhead Box G1	Protein Coding	P55316	53	GC14P046011	8.38444	https://www.genecards.org/cgi-bin/carddisp.pl?gene=FOXG1
TRPV1	Transient Receptor Potential Cation Channel Subfamily V Member 1	Protein Coding	Q8NER1	56	GC17M003565	8.3803	https://www.genecards.org/cgi-bin/carddisp.pl?gene=TRPV1
FKBP5	FKBP Prolyl Isomerase 5	Protein Coding	Q13451	58	GC06M093925	8.37662	https://www.genecards.org/cgi-bin/carddisp.pl?gene=FKBP5
PCSK9	Proprotein Convertase Subtilisin/Kexin Type 9	Protein Coding	Q8NBP7	59	GC01P055039	8.37661	https://www.genecards.org/cgi-bin/carddisp.pl?gene=PCSK9
SMIM20	Small Integral Membrane Protein 20	Protein Coding	Q8N5G0	34	GC04P025891	8.37076	https://www.genecards.org/cgi-bin/carddisp.pl?gene=SMIM20
PRKCH	Protein Kinase C Eta	Protein Coding	P24723	56	GC14P061187	8.37003	https://www.genecards.org/cgi-bin/carddisp.pl?gene=PRKCH
DAO	D-Amino Acid Oxidase	Protein Coding	P14920	53	GC12P108865	8.36904	https://www.genecards.org/cgi-bin/carddisp.pl?gene=DAO
TCIRG1	T Cell Immune Regulator 1, ATPase H+ Transporting V0 Subunit A3	Protein Coding	Q13488	53	GC11P089285	8.36555	https://www.genecards.org/cgi-bin/carddisp.pl?gene=TCIRG1
CYP21A2	Cytochrome P450 Family 21 Subfamily A Member 2	Protein Coding	P08686	52	GC06P134844	8.36058	https://www.genecards.org/cgi-bin/carddisp.pl?gene=CYP21A2
MIF	Macrophage Migration Inhibitory Factor	Protein Coding	P14174	56	GC22P023894	8.36	https://www.genecards.org/cgi-bin/carddisp.pl?gene=MIF
SP2	Sp2 Transcription Factor	Protein Coding	Q02086	46	GC17P047896	8.35706	https://www.genecards.org/cgi-bin/carddisp.pl?gene=SP2
SELP	Selectin P	Protein Coding	P16109	54	GC01M169558	8.35301	https://www.genecards.org/cgi-bin/carddisp.pl?gene=SELP
TRAF6	TNF Receptor Associated Factor 6	Protein Coding	Q9Y4K3	55	GC11M036467	8.34942	https://www.genecards.org/cgi-bin/carddisp.pl?gene=TRAF6
ARSA	Arylsulfatase A	Protein Coding	P15289	56	GC22M050622	8.34846	https://www.genecards.org/cgi-bin/carddisp.pl?gene=ARSA
DICER1	Dicer 1, Ribonuclease III	Protein Coding	Q9UPY3	57	GC14M095086	8.34477	https://www.genecards.org/cgi-bin/carddisp.pl?gene=DICER1
EPRS1	Glutamyl-Prolyl-TRNA Synthetase 1	Protein Coding	P07814	53	GC01M219969	8.34454	https://www.genecards.org/cgi-bin/carddisp.pl?gene=EPRS1
MCCC1	Methylcrotonyl-CoA Carboxylase Subunit 1	Protein Coding	Q96RQ3	51	GC03M183015	8.34415	https://www.genecards.org/cgi-bin/carddisp.pl?gene=MCCC1
PRKD1	Protein Kinase D1	Protein Coding	Q15139	58	GC14M029576	8.34197	https://www.genecards.org/cgi-bin/carddisp.pl?gene=PRKD1
AHI1	Abelson Helper Integration Site 1	Protein Coding	Q8N157	50	GC06M135283	8.33199	https://www.genecards.org/cgi-bin/carddisp.pl?gene=AHI1
ALPP	Alkaline Phosphatase, Placental	Protein Coding	P05187	53	GC02P232378	8.33175	https://www.genecards.org/cgi-bin/carddisp.pl?gene=ALPP
S100B	S100 Calcium Binding Protein B	Protein Coding	P04271	53	GC21M053599	8.32819	https://www.genecards.org/cgi-bin/carddisp.pl?gene=S100B
SNORD118	Small Nucleolar RNA, C/D Box 118	RNA Gene		25	GC17M074901	8.32462	https://www.genecards.org/cgi-bin/carddisp.pl?gene=SNORD118
PRICKLE2-AS1	PRICKLE2 Antisense RNA 1	RNA Gene		19	GC03P064063	8.3237	https://www.genecards.org/cgi-bin/carddisp.pl?gene=PRICKLE2-AS1
ADCY10	Adenylate Cyclase 10	Protein Coding	Q96PN6	52	GC01M167809	8.32147	https://www.genecards.org/cgi-bin/carddisp.pl?gene=ADCY10
GPX1	Glutathione Peroxidase 1	Protein Coding	P07203	51	GC03M053731	8.32086	https://www.genecards.org/cgi-bin/carddisp.pl?gene=GPX1
ACOT2	Acyl-CoA Thioesterase 2	Protein Coding	P49753	43	GC14P073567	8.31829	https://www.genecards.org/cgi-bin/carddisp.pl?gene=ACOT2
CYP1A2	Cytochrome P450 Family 1 Subfamily A Member 2	Protein Coding	P05177	54	GC15P074748	8.30405	https://www.genecards.org/cgi-bin/carddisp.pl?gene=CYP1A2
EXD2	Exonuclease 3'-5' Domain Containing 2	Protein Coding	Q9NVH0	39	GC14P069191	8.30095	https://www.genecards.org/cgi-bin/carddisp.pl?gene=EXD2
MRPL45P2	Mitochondrial Ribosomal Protein L45 Pseudogene 2	Pseudogene		12	GC17M047450	8.29596	https://www.genecards.org/cgi-bin/carddisp.pl?gene=MRPL45P2
MRPL35P2	Mitochondrial Ribosomal Protein L35 Pseudogene 2	Pseudogene		10	GC10M063634	8.29596	https://www.genecards.org/cgi-bin/carddisp.pl?gene=MRPL35P2
NRAS	NRAS Proto-Oncogene, GTPase	Protein Coding	P01111	59	GC01M114704	8.29579	https://www.genecards.org/cgi-bin/carddisp.pl?gene=NRAS
LOC106627981	GBA Recombination Region	Functional Element		10	GC01P155233	8.29469	https://www.genecards.org/cgi-bin/carddisp.pl?gene=LOC106627981
REEP1	Receptor Accessory Protein 1	Protein Coding	Q9H902	49	GC02M086213	8.28314	https://www.genecards.org/cgi-bin/carddisp.pl?gene=REEP1
CNGA3	Cyclic Nucleotide Gated Channel Subunit Alpha 3	Protein Coding	Q16281	52	GC02P098355	8.28171	https://www.genecards.org/cgi-bin/carddisp.pl?gene=CNGA3
TUBB4A	Tubulin Beta 4A Class IVa	Protein Coding	P04350	56	GC19M091894	8.28074	https://www.genecards.org/cgi-bin/carddisp.pl?gene=TUBB4A
SLC26A1	Solute Carrier Family 26 Member 1	Protein Coding	Q9H2B4	47	GC04M004794	8.27979	https://www.genecards.org/cgi-bin/carddisp.pl?gene=SLC26A1
DDIT3	DNA Damage Inducible Transcript 3	Protein Coding	P35638	55	GC12M057516	8.27944	https://www.genecards.org/cgi-bin/carddisp.pl?gene=DDIT3
TP73	Tumor Protein P73	Protein Coding	O15350	53	GC01P003652	8.27747	https://www.genecards.org/cgi-bin/carddisp.pl?gene=TP73
FERMT3	FERM Domain Containing Kindlin 3	Protein Coding	Q86UX7	51	GC11P088953	8.2766	https://www.genecards.org/cgi-bin/carddisp.pl?gene=FERMT3
LDB3	LIM Domain Binding 3	Protein Coding	O75112	51	GC10P086666	8.27556	https://www.genecards.org/cgi-bin/carddisp.pl?gene=LDB3
ALDH6A1	Aldehyde Dehydrogenase 6 Family Member A1	Protein Coding	Q02252	52	GC14M074065	8.27217	https://www.genecards.org/cgi-bin/carddisp.pl?gene=ALDH6A1
CANX	Calnexin	Protein Coding	P27824	54	GC05P179678	8.26541	https://www.genecards.org/cgi-bin/carddisp.pl?gene=CANX
MB	Myoglobin	Protein Coding	P02144	54	GC22M035606	8.25635	https://www.genecards.org/cgi-bin/carddisp.pl?gene=MB
KITLG	KIT Ligand	Protein Coding	P21583	55	GC12M088492	8.25255	https://www.genecards.org/cgi-bin/carddisp.pl?gene=KITLG
UBN2	Ubinuclein 2	Protein Coding	Q6ZU65	41	GC07P139230	8.24728	https://www.genecards.org/cgi-bin/carddisp.pl?gene=UBN2
SMCP	Sperm Mitochondria Associated Cysteine Rich Protein	Protein Coding	P49901	39	GC01P152878	8.24543	https://www.genecards.org/cgi-bin/carddisp.pl?gene=SMCP
GOLPH3	Golgi Phosphoprotein 3	Protein Coding	Q9H4A6	47	GC05M032124	8.24457	https://www.genecards.org/cgi-bin/carddisp.pl?gene=GOLPH3
FLT1	Fms Related Receptor Tyrosine Kinase 1	Protein Coding	P17948	59	GC13M028300	8.24369	https://www.genecards.org/cgi-bin/carddisp.pl?gene=FLT1
KCNQ2	Potassium Voltage-Gated Channel Subfamily Q Member 2	Protein Coding	O43526	56	GC20M063400	8.24237	https://www.genecards.org/cgi-bin/carddisp.pl?gene=KCNQ2
PTH	Parathyroid Hormone	Protein Coding	P01270	54	GC11M013492	8.23901	https://www.genecards.org/cgi-bin/carddisp.pl?gene=PTH
GARS1	Glycyl-TRNA Synthetase 1	Protein Coding	P41250	54	GC07P030580	8.23533	https://www.genecards.org/cgi-bin/carddisp.pl?gene=GARS1
MRPL49P2	Mitochondrial Ribosomal Protein L49 Pseudogene 2	Pseudogene		10	GC08P016374	8.23507	https://www.genecards.org/cgi-bin/carddisp.pl?gene=MRPL49P2
MIR483	MicroRNA 483	RNA Gene		27	GC11M011909	8.23131	https://www.genecards.org/cgi-bin/carddisp.pl?gene=MIR483
MRPL57P3	Mitochondrial Ribosomal Protein L57 Pseudogene 3	Pseudogene		8	GC03P057435	8.22274	https://www.genecards.org/cgi-bin/carddisp.pl?gene=MRPL57P3
MRPL57P1	Mitochondrial Ribosomal Protein L57 Pseudogene 1	Pseudogene		7	GC01M114279	8.22274	https://www.genecards.org/cgi-bin/carddisp.pl?gene=MRPL57P1
MRPL57P2	Mitochondrial Ribosomal Protein L57 Pseudogene 2	Pseudogene		6	GC01M227572	8.22274	https://www.genecards.org/cgi-bin/carddisp.pl?gene=MRPL57P2
MRPL57P7	Mitochondrial Ribosomal Protein L57 Pseudogene 7	Pseudogene		6	GC08M098906	8.22274	https://www.genecards.org/cgi-bin/carddisp.pl?gene=MRPL57P7
MRPL57P8	Mitochondrial Ribosomal Protein L57 Pseudogene 8	Pseudogene		6	GC14M035219	8.22274	https://www.genecards.org/cgi-bin/carddisp.pl?gene=MRPL57P8
MRPS6P1	Mitochondrial Ribosomal Protein S6 Pseudogene 1	Pseudogene		6	GC01M031042	8.22274	https://www.genecards.org/cgi-bin/carddisp.pl?gene=MRPS6P1
MRPS7P1	Mitochondrial Ribosomal Protein S7 Pseudogene 1	Pseudogene		6	GC08M036796	8.22274	https://www.genecards.org/cgi-bin/carddisp.pl?gene=MRPS7P1
MRPL57P9	Mitochondrial Ribosomal Protein L57 Pseudogene 9	Pseudogene		5	GC14P050917	8.22274	https://www.genecards.org/cgi-bin/carddisp.pl?gene=MRPL57P9
MRPL57P10	Mitochondrial Ribosomal Protein L57 Pseudogene 10	Pseudogene		4	GC0YP010156	8.22274	https://www.genecards.org/cgi-bin/carddisp.pl?gene=MRPL57P10
COL4A5	Collagen Type IV Alpha 5 Chain	Protein Coding	P29400	52	GC0XP108439	8.22232	https://www.genecards.org/cgi-bin/carddisp.pl?gene=COL4A5
ENPP1	Ectonucleotide Pyrophosphatase/Phosphodiesterase 1	Protein Coding	P22413	58	GC06P131808	8.21978	https://www.genecards.org/cgi-bin/carddisp.pl?gene=ENPP1
ZSWIM7	Zinc Finger SWIM-Type Containing 7	Protein Coding	Q19AV6	39	GC17M075526	8.21795	https://www.genecards.org/cgi-bin/carddisp.pl?gene=ZSWIM7
PDK2	Pyruvate Dehydrogenase Kinase 2	Protein Coding	Q15119	49	GC17P112614	8.21746	https://www.genecards.org/cgi-bin/carddisp.pl?gene=PDK2
MYO19	Myosin XIX	Protein Coding	Q96H55	41	GC17M036495	8.21609	https://www.genecards.org/cgi-bin/carddisp.pl?gene=MYO19
ACTG2	Actin Gamma 2, Smooth Muscle	Protein Coding	P63267	51	GC02P073892	8.21569	https://www.genecards.org/cgi-bin/carddisp.pl?gene=ACTG2
IL17A	Interleukin 17A	Protein Coding	Q16552	52	GC06P052186	8.21364	https://www.genecards.org/cgi-bin/carddisp.pl?gene=IL17A
CASP7	Caspase 7	Protein Coding	P55210	58	GC10P113679	8.20806	https://www.genecards.org/cgi-bin/carddisp.pl?gene=CASP7
MIR200A	MicroRNA 200a	RNA Gene		27	GC01P020464	8.2067	https://www.genecards.org/cgi-bin/carddisp.pl?gene=MIR200A
LOC130006506	ATAC-STARR-Seq Lymphoblastoid Active Region 5325	Functional Element		8	GC11P093045	8.20256	https://www.genecards.org/cgi-bin/carddisp.pl?gene=LOC130006506
MIR146A	MicroRNA 146a	RNA Gene		29	GC05P160485	8.19655	https://www.genecards.org/cgi-bin/carddisp.pl?gene=MIR146A
GABRB2	Gamma-Aminobutyric Acid Type A Receptor Subunit Beta2	Protein Coding	P47870	56	GC05M161288	8.19479	https://www.genecards.org/cgi-bin/carddisp.pl?gene=GABRB2
HNRNPK	Heterogeneous Nuclear Ribonucleoprotein K	Protein Coding	P61978	54	GC09M109180	8.19313	https://www.genecards.org/cgi-bin/carddisp.pl?gene=HNRNPK
MIR199A1	MicroRNA 199a-1	RNA Gene		26	GC19M010817	8.19108	https://www.genecards.org/cgi-bin/carddisp.pl?gene=MIR199A1
HDAC9	Histone Deacetylase 9	Protein Coding	Q9UKV0	58	GC07P018086	8.18921	https://www.genecards.org/cgi-bin/carddisp.pl?gene=HDAC9
COX7B2	Cytochrome C Oxidase Subunit 7B2	Protein Coding	Q8TF08	38	GC04M046734	8.17491	https://www.genecards.org/cgi-bin/carddisp.pl?gene=COX7B2
RNASET2	Ribonuclease T2	Protein Coding	O00584	53	GC06M166924	8.1745	https://www.genecards.org/cgi-bin/carddisp.pl?gene=RNASET2
MAPK10	Mitogen-Activated Protein Kinase 10	Protein Coding	P53779	55	GC04M085990	8.17272	https://www.genecards.org/cgi-bin/carddisp.pl?gene=MAPK10
C4A	Complement C4A (Chido/Rodgers Blood Group)	Protein Coding	P0C0L4	52	GC06P134843	8.17241	https://www.genecards.org/cgi-bin/carddisp.pl?gene=C4A
GPHN	Gephyrin	Protein Coding	Q9NQX3	56	GC14P066507	8.16554	https://www.genecards.org/cgi-bin/carddisp.pl?gene=GPHN
NKX2-5	NK2 Homeobox 5	Protein Coding	P52952	54	GC05M173232	8.16534	https://www.genecards.org/cgi-bin/carddisp.pl?gene=NKX2-5
PLSCR3	Phospholipid Scramblase 3	Protein Coding	Q9NRY6	45	GC17M007389	8.16375	https://www.genecards.org/cgi-bin/carddisp.pl?gene=PLSCR3
YY1	YY1 Transcription Factor	Protein Coding	P25490	56	GC14P100238	8.15791	https://www.genecards.org/cgi-bin/carddisp.pl?gene=YY1
TUBA1A	Tubulin Alpha 1a	Protein Coding	Q71U36	57	GC12M049184	8.15388	https://www.genecards.org/cgi-bin/carddisp.pl?gene=TUBA1A
CBL	Cbl Proto-Oncogene	Protein Coding	P22681	59	GC11P119206	8.15218	https://www.genecards.org/cgi-bin/carddisp.pl?gene=CBL
MUTYH	MutY DNA Glycosylase	Protein Coding	Q9UIF7	53	GC01M045329	8.14924	https://www.genecards.org/cgi-bin/carddisp.pl?gene=MUTYH
CAMK2A	Calcium/Calmodulin Dependent Protein Kinase II Alpha	Protein Coding	Q9UQM7	61	GC05M150219	8.14695	https://www.genecards.org/cgi-bin/carddisp.pl?gene=CAMK2A
NR2E3	Nuclear Receptor Subfamily 2 Group E Member 3	Protein Coding	Q9Y5X4	50	GC15P071792	8.14636	https://www.genecards.org/cgi-bin/carddisp.pl?gene=NR2E3
AFP	Alpha Fetoprotein	Protein Coding	P02771	56	GC04P073431	8.14354	https://www.genecards.org/cgi-bin/carddisp.pl?gene=AFP
IL1RN	Interleukin 1 Receptor Antagonist	Protein Coding	P18510	59	GC02P143688	8.14198	https://www.genecards.org/cgi-bin/carddisp.pl?gene=IL1RN
MRPL11P2	Mitochondrial Ribosomal Protein L11 Pseudogene 2	Pseudogene		7	GC05M142036	8.14157	https://www.genecards.org/cgi-bin/carddisp.pl?gene=MRPL11P2
AKT3	AKT Serine/Threonine Kinase 3	Protein Coding	Q9Y243	63	GC01M243488	8.1388	https://www.genecards.org/cgi-bin/carddisp.pl?gene=AKT3
MRPS18AP1	Mitochondrial Ribosomal Protein S18A Pseudogene 1	Pseudogene		9	GC03M048256	8.13536	https://www.genecards.org/cgi-bin/carddisp.pl?gene=MRPS18AP1
MRPS17P3	Mitochondrial Ribosomal Protein S17 Pseudogene 3	Pseudogene		8	GC03P078526	8.13536	https://www.genecards.org/cgi-bin/carddisp.pl?gene=MRPS17P3
MRPS18BP2	Mitochondrial Ribosomal Protein S18B Pseudogene 2	Pseudogene		8	GC02P139668	8.13536	https://www.genecards.org/cgi-bin/carddisp.pl?gene=MRPS18BP2
GPD1	Glycerol-3-Phosphate Dehydrogenase 1	Protein Coding	P21695	53	GC12P060287	8.13501	https://www.genecards.org/cgi-bin/carddisp.pl?gene=GPD1
MIR150	MicroRNA 150	RNA Gene		29	GC19M049500	8.12313	https://www.genecards.org/cgi-bin/carddisp.pl?gene=MIR150
NAGLU	N-Acetyl-Alpha-Glucosaminidase	Protein Coding	P54802	52	GC17P112331	8.12064	https://www.genecards.org/cgi-bin/carddisp.pl?gene=NAGLU
DHFR2	Dihydrofolate Reductase 2	Protein Coding	Q86XF0	42	GC03M094048	8.11992	https://www.genecards.org/cgi-bin/carddisp.pl?gene=DHFR2
MTHFD2	Methylenetetrahydrofolate Dehydrogenase (NADP+ Dependent) 2, Methenyltetrahydrofolate Cyclohydrolase	Protein Coding	P13995	49	GC02P074186	8.11991	https://www.genecards.org/cgi-bin/carddisp.pl?gene=MTHFD2
PDE6B	Phosphodiesterase 6B	Protein Coding	P35913	55	GC04P003844	8.11508	https://www.genecards.org/cgi-bin/carddisp.pl?gene=PDE6B
CRX	Cone-Rod Homeobox	Protein Coding	O43186	50	GC19P047819	8.10937	https://www.genecards.org/cgi-bin/carddisp.pl?gene=CRX
PDE2A	Phosphodiesterase 2A	Protein Coding	O00408	53	GC11M072576	8.10778	https://www.genecards.org/cgi-bin/carddisp.pl?gene=PDE2A
ASL	Argininosuccinate Lyase	Protein Coding	P04424	53	GC07P066075	8.10092	https://www.genecards.org/cgi-bin/carddisp.pl?gene=ASL
SARDH	Sarcosine Dehydrogenase	Protein Coding	Q9UL12	51	GC09M133663	8.09393	https://www.genecards.org/cgi-bin/carddisp.pl?gene=SARDH
NKX2-1	NK2 Homeobox 1	Protein Coding	P43699	56	GC14M036516	8.09113	https://www.genecards.org/cgi-bin/carddisp.pl?gene=NKX2-1
LMNB1	Lamin B1	Protein Coding	P20700	55	GC05P126776	8.09087	https://www.genecards.org/cgi-bin/carddisp.pl?gene=LMNB1
CIB2	Calcium And Integrin Binding Family Member 2	Protein Coding	O75838	48	GC15M078104	8.08836	https://www.genecards.org/cgi-bin/carddisp.pl?gene=CIB2
CCK	Cholecystokinin	Protein Coding	P06307	51	GC03M042274	8.08691	https://www.genecards.org/cgi-bin/carddisp.pl?gene=CCK
CYB5A	Cytochrome B5 Type A	Protein Coding	P00167	52	GC18M074250	8.08675	https://www.genecards.org/cgi-bin/carddisp.pl?gene=CYB5A
IDUA	Alpha-L-Iduronidase	Protein Coding	P35475	54	GC04P000986	8.08673	https://www.genecards.org/cgi-bin/carddisp.pl?gene=IDUA
UBE2D1	Ubiquitin Conjugating Enzyme E2 D1	Protein Coding	P51668	53	GC10P058334	8.08347	https://www.genecards.org/cgi-bin/carddisp.pl?gene=UBE2D1
THPO	Thrombopoietin	Protein Coding	P40225	52	GC03M184371	8.08302	https://www.genecards.org/cgi-bin/carddisp.pl?gene=THPO
BBS7	Bardet-Biedl Syndrome 7	Protein Coding	Q8IWZ6	48	GC04M121824	8.08236	https://www.genecards.org/cgi-bin/carddisp.pl?gene=BBS7
HUWE1	HECT, UBA And WWE Domain Containing E3 Ubiquitin Protein Ligase 1	Protein Coding	Q7Z6Z7	55	GC0XM053532	8.07689	https://www.genecards.org/cgi-bin/carddisp.pl?gene=HUWE1
IFT140	Intraflagellar Transport 140	Protein Coding	Q96RY7	50	GC16M020275	8.07578	https://www.genecards.org/cgi-bin/carddisp.pl?gene=IFT140
NRG1	Neuregulin 1	Protein Coding	Q02297	58	GC08P031639	8.07545	https://www.genecards.org/cgi-bin/carddisp.pl?gene=NRG1
KCNJ11	Potassium Inwardly Rectifying Channel Subfamily J Member 11	Protein Coding	Q14654	54	GC11M017948	8.07066	https://www.genecards.org/cgi-bin/carddisp.pl?gene=KCNJ11
ATP5MGL	ATP Synthase Membrane Subunit G Like	Protein Coding	Q7Z4Y8	29	GC22M077136	8.06525	https://www.genecards.org/cgi-bin/carddisp.pl?gene=ATP5MGL
MSH2	MutS Homolog 2	Protein Coding	P43246	57	GC02P047403	8.06357	https://www.genecards.org/cgi-bin/carddisp.pl?gene=MSH2
PAH	Phenylalanine Hydroxylase	Protein Coding	P00439	56	GC12M102836	8.06272	https://www.genecards.org/cgi-bin/carddisp.pl?gene=PAH
JAK3	Janus Kinase 3	Protein Coding	P52333	59	GC19M017824	8.05767	https://www.genecards.org/cgi-bin/carddisp.pl?gene=JAK3
TERC	Telomerase RNA Component	RNA Gene		35	GC03M169765	8.05675	https://www.genecards.org/cgi-bin/carddisp.pl?gene=TERC
MIR126	MicroRNA 126	RNA Gene		29	GC09P136670	8.05114	https://www.genecards.org/cgi-bin/carddisp.pl?gene=MIR126
THRB	Thyroid Hormone Receptor Beta	Protein Coding	P10828	58	GC03M024117	8.05013	https://www.genecards.org/cgi-bin/carddisp.pl?gene=THRB
TANGO2	Transport And Golgi Organization 2 Homolog	Protein Coding	Q6ICL3	44	GC22P020017	8.039	https://www.genecards.org/cgi-bin/carddisp.pl?gene=TANGO2
CRB1	Crumbs Cell Polarity Complex Component 1	Protein Coding	P82279	51	GC01P197208	8.03735	https://www.genecards.org/cgi-bin/carddisp.pl?gene=CRB1
NUP62	Nucleoporin 62	Protein Coding	P37198	52	GC19M049906	8.03374	https://www.genecards.org/cgi-bin/carddisp.pl?gene=NUP62
TMCO1	Transmembrane And Coiled-Coil Domains 1	Protein Coding	Q9UM00	48	GC01M165724	8.03295	https://www.genecards.org/cgi-bin/carddisp.pl?gene=TMCO1
LRP1	LDL Receptor Related Protein 1	Protein Coding	Q07954	56	GC12P057128	8.03063	https://www.genecards.org/cgi-bin/carddisp.pl?gene=LRP1
CA5B	Carbonic Anhydrase 5B	Protein Coding	Q9Y2D0	47	GC0XP015688	8.02263	https://www.genecards.org/cgi-bin/carddisp.pl?gene=CA5B
USP9X	Ubiquitin Specific Peptidase 9 X-Linked	Protein Coding	Q93008	57	GC0XP041085	8.01939	https://www.genecards.org/cgi-bin/carddisp.pl?gene=USP9X
RB1	RB Transcriptional Corepressor 1	Protein Coding	P06400	57	GC13P048303	8.01871	https://www.genecards.org/cgi-bin/carddisp.pl?gene=RB1
GATD3	Glutamine Amidotransferase Class 1 Domain Containing 3	Protein Coding	P0DPI2	43	GC21P048146	8.01827	https://www.genecards.org/cgi-bin/carddisp.pl?gene=GATD3
IMMTP1	Inner Membrane Mitochondrial Protein Pseudogene 1	Pseudogene		13	GC21M044675	8.01073	https://www.genecards.org/cgi-bin/carddisp.pl?gene=IMMTP1
MTHFD1L	Methylenetetrahydrofolate Dehydrogenase (NADP+ Dependent) 1 Like	Protein Coding	Q6UB35	47	GC06P150865	8.00455	https://www.genecards.org/cgi-bin/carddisp.pl?gene=MTHFD1L
DAOA	D-Amino Acid Oxidase Activator	Protein Coding	P59103	39	GC13P105465	7.99854	https://www.genecards.org/cgi-bin/carddisp.pl?gene=DAOA
UBQLN2	Ubiquilin 2	Protein Coding	Q9UHD9	51	GC0XP056563	7.99673	https://www.genecards.org/cgi-bin/carddisp.pl?gene=UBQLN2
MEFV	MEFV Innate Immunity Regulator, Pyrin	Protein Coding	O15553	53	GC16M020459	7.99642	https://www.genecards.org/cgi-bin/carddisp.pl?gene=MEFV
DNM1	Dynamin 1	Protein Coding	Q05193	58	GC09P128191	7.9953	https://www.genecards.org/cgi-bin/carddisp.pl?gene=DNM1
D2HGDH	D-2-Hydroxyglutarate Dehydrogenase	Protein Coding	Q8N465	49	GC02P241734	7.9913	https://www.genecards.org/cgi-bin/carddisp.pl?gene=D2HGDH
TLR3	Toll Like Receptor 3	Protein Coding	O15455	60	GC04P186059	7.98722	https://www.genecards.org/cgi-bin/carddisp.pl?gene=TLR3
ALDH4A1	Aldehyde Dehydrogenase 4 Family Member A1	Protein Coding	P30038	53	GC01M018871	7.97882	https://www.genecards.org/cgi-bin/carddisp.pl?gene=ALDH4A1
GANAB	Glucosidase II Alpha Subunit	Protein Coding	Q14697	54	GC11M125242	7.97619	https://www.genecards.org/cgi-bin/carddisp.pl?gene=GANAB
DOK7	Docking Protein 7	Protein Coding	Q18PE1	47	GC04P004117	7.97461	https://www.genecards.org/cgi-bin/carddisp.pl?gene=DOK7
RPGRIP1	RPGR Interacting Protein 1	Protein Coding	Q96KN7	48	GC14P045775	7.97242	https://www.genecards.org/cgi-bin/carddisp.pl?gene=RPGRIP1
AGER	Advanced Glycosylation End-Product Specific Receptor	Protein Coding	Q15109	55	GC06M032180	7.97128	https://www.genecards.org/cgi-bin/carddisp.pl?gene=AGER
CYP19A1	Cytochrome P450 Family 19 Subfamily A Member 1	Protein Coding	P11511	56	GC15M051208	7.97018	https://www.genecards.org/cgi-bin/carddisp.pl?gene=CYP19A1
GLUD2	Glutamate Dehydrogenase 2	Protein Coding	P49448	50	GC0XP121047	7.96559	https://www.genecards.org/cgi-bin/carddisp.pl?gene=GLUD2
IL12RB1	Interleukin 12 Receptor Subunit Beta 1	Protein Coding	P42701	54	GC19M018058	7.96399	https://www.genecards.org/cgi-bin/carddisp.pl?gene=IL12RB1
COL4A3	Collagen Type IV Alpha 3 Chain	Protein Coding	Q01955	54	GC02P227164	7.95944	https://www.genecards.org/cgi-bin/carddisp.pl?gene=COL4A3
FPGS	Folylpolyglutamate Synthase	Protein Coding	Q05932	50	GC09P127794	7.95544	https://www.genecards.org/cgi-bin/carddisp.pl?gene=FPGS
GNRH1	Gonadotropin Releasing Hormone 1	Protein Coding	P01148	50	GC08M025419	7.9525	https://www.genecards.org/cgi-bin/carddisp.pl?gene=GNRH1
SCN8A	Sodium Voltage-Gated Channel Alpha Subunit 8	Protein Coding	Q9UQD0	58	GC12P051590	7.95185	https://www.genecards.org/cgi-bin/carddisp.pl?gene=SCN8A
ATP5F1EP2	ATP Synthase F1 Subunit Epsilon Pseudogene 2	Pseudogene	Q5VTU8	21	GC13P027946	7.95153	https://www.genecards.org/cgi-bin/carddisp.pl?gene=ATP5F1EP2
ELANE	Elastase, Neutrophil Expressed	Protein Coding	P08246	60	GC19P111819	7.95055	https://www.genecards.org/cgi-bin/carddisp.pl?gene=ELANE
MRPL2P1	Mitochondrial Ribosomal Protein L2 Pseudogene 1	Pseudogene		9	GC12P089752	7.94968	https://www.genecards.org/cgi-bin/carddisp.pl?gene=MRPL2P1
NOD2	Nucleotide Binding Oligomerization Domain Containing 2	Protein Coding	Q9HC29	56	GC16P050693	7.94812	https://www.genecards.org/cgi-bin/carddisp.pl?gene=NOD2
NMTRL-TAA3-1	Nuclear-Encoded Mitochondrial TRNA-Leu (TAA) 3-1	Pseudogene		4	GC01M237943	7.94797	https://www.genecards.org/cgi-bin/carddisp.pl?gene=NMTRL-TAA3-1
NALCN	Sodium Leak Channel, Non-Selective	Protein Coding	Q8IZF0	48	GC13M101053	7.94701	https://www.genecards.org/cgi-bin/carddisp.pl?gene=NALCN
MRPL51P1	Mitochondrial Ribosomal Protein L51 Pseudogene 1	Pseudogene		5	GC04M027424	7.94562	https://www.genecards.org/cgi-bin/carddisp.pl?gene=MRPL51P1
GAL	Galanin And GMAP Prepropeptide	Protein Coding	P22466	54	GC11P089308	7.94328	https://www.genecards.org/cgi-bin/carddisp.pl?gene=GAL
TIMM17BP1	Translocase Of Inner Mitochondrial Membrane 17B Pseudogene 1	Pseudogene		6	GC12P017400	7.94296	https://www.genecards.org/cgi-bin/carddisp.pl?gene=TIMM17BP1
NMTRL-TAA2-1	Nuclear-Encoded Mitochondrial TRNA-Leu (TAA) 2-1	Pseudogene		4	GC02P117023	7.94176	https://www.genecards.org/cgi-bin/carddisp.pl?gene=NMTRL-TAA2-1
MRPS21P6	Mitochondrial Ribosomal Protein S21 Pseudogene 6	Pseudogene		9	GC10P125166	7.94135	https://www.genecards.org/cgi-bin/carddisp.pl?gene=MRPS21P6
MRPS36P5	Mitochondrial Ribosomal Protein S36 Pseudogene 5	Pseudogene		8	GC12M043054	7.94135	https://www.genecards.org/cgi-bin/carddisp.pl?gene=MRPS36P5
MRPS5P4	Mitochondrial Ribosomal Protein S5 Pseudogene 4	Pseudogene		8	GC18P060519	7.94135	https://www.genecards.org/cgi-bin/carddisp.pl?gene=MRPS5P4
MRPS35P1	Mitochondrial Ribosomal Protein S35 Pseudogene 1	Pseudogene		6	GC03P005446	7.94135	https://www.genecards.org/cgi-bin/carddisp.pl?gene=MRPS35P1
BBS4	Bardet-Biedl Syndrome 4	Protein Coding	Q96RK4	50	GC15P072686	7.9403	https://www.genecards.org/cgi-bin/carddisp.pl?gene=BBS4
GRB2	Growth Factor Receptor Bound Protein 2	Protein Coding	P62993	55	GC17M075318	7.93527	https://www.genecards.org/cgi-bin/carddisp.pl?gene=GRB2
TPK1	Thiamin Pyrophosphokinase 1	Protein Coding	Q9H3S4	53	GC07M144451	7.93048	https://www.genecards.org/cgi-bin/carddisp.pl?gene=TPK1
MRPS16P2	Mitochondrial Ribosomal Protein S16 Pseudogene 2	Pseudogene		10	GC20P059113	7.92882	https://www.genecards.org/cgi-bin/carddisp.pl?gene=MRPS16P2
RARA	Retinoic Acid Receptor Alpha	Protein Coding	P10276	59	GC17P040309	7.92697	https://www.genecards.org/cgi-bin/carddisp.pl?gene=RARA
PPP1CB	Protein Phosphatase 1 Catalytic Subunit Beta	Protein Coding	P62140	54	GC02P028766	7.92128	https://www.genecards.org/cgi-bin/carddisp.pl?gene=PPP1CB
MRPL48P1	Mitochondrial Ribosomal Protein L48 Pseudogene 1	Pseudogene		9	GC06M010459	7.92046	https://www.genecards.org/cgi-bin/carddisp.pl?gene=MRPL48P1
ATP2A1	ATPase Sarcoplasmic/Endoplasmic Reticulum Ca2+ Transporting 1	Protein Coding	O14983	57	GC16P081412	7.91915	https://www.genecards.org/cgi-bin/carddisp.pl?gene=ATP2A1
PYCR1	Pyrroline-5-Carboxylate Reductase 1	Protein Coding	P32322	53	GC17M081932	7.91656	https://www.genecards.org/cgi-bin/carddisp.pl?gene=PYCR1
SMAD2	SMAD Family Member 2	Protein Coding	Q15796	60	GC18M047809	7.91473	https://www.genecards.org/cgi-bin/carddisp.pl?gene=SMAD2
SARM1	Sterile Alpha And TIR Motif Containing 1	Protein Coding	Q6SZW1	50	GC17P028364	7.91408	https://www.genecards.org/cgi-bin/carddisp.pl?gene=SARM1
PRF1	Perforin 1	Protein Coding	P14222	55	GC10M070597	7.91062	https://www.genecards.org/cgi-bin/carddisp.pl?gene=PRF1
HARS1	Histidyl-TRNA Synthetase 1	Protein Coding	P12081	53	GC05M140673	7.91042	https://www.genecards.org/cgi-bin/carddisp.pl?gene=HARS1
PRKDC	Protein Kinase, DNA-Activated, Catalytic Subunit	Protein Coding	P78527	59	GC08M047773	7.90788	https://www.genecards.org/cgi-bin/carddisp.pl?gene=PRKDC
MIR195	MicroRNA 195	RNA Gene		26	GC17M074818	7.9061	https://www.genecards.org/cgi-bin/carddisp.pl?gene=MIR195
ACO1	Aconitase 1	Protein Coding	P21399	52	GC09P032374	7.90116	https://www.genecards.org/cgi-bin/carddisp.pl?gene=ACO1
TIMM8AP1	Translocase Of Inner Mitochondrial Membrane 8A Pseudogene 1	Pseudogene		11	GC02M162076	7.89977	https://www.genecards.org/cgi-bin/carddisp.pl?gene=TIMM8AP1
SREBF1	Sterol Regulatory Element Binding Transcription Factor 1	Protein Coding	P36956	58	GC17M017810	7.89275	https://www.genecards.org/cgi-bin/carddisp.pl?gene=SREBF1
XRCC2	X-Ray Repair Cross Complementing 2	Protein Coding	O43543	50	GC07M152644	7.89125	https://www.genecards.org/cgi-bin/carddisp.pl?gene=XRCC2
DMAC2	Distal Membrane Arm Assembly Component 2	Protein Coding	Q9NW81	38	GC19M092804	7.89103	https://www.genecards.org/cgi-bin/carddisp.pl?gene=DMAC2
IL13	Interleukin 13	Protein Coding	P35225	53	GC05P132656	7.89075	https://www.genecards.org/cgi-bin/carddisp.pl?gene=IL13
IQGAP1	IQ Motif Containing GTPase Activating Protein 1	Protein Coding	P46940	52	GC15P090388	7.88768	https://www.genecards.org/cgi-bin/carddisp.pl?gene=IQGAP1
PRKCG	Protein Kinase C Gamma	Protein Coding	P05129	59	GC19P053879	7.8859	https://www.genecards.org/cgi-bin/carddisp.pl?gene=PRKCG
BARD1	BRCA1 Associated RING Domain 1	Protein Coding	Q99728	55	GC02M214725	7.88208	https://www.genecards.org/cgi-bin/carddisp.pl?gene=BARD1
SORD	Sorbitol Dehydrogenase	Protein Coding	Q00796	56	GC15P045023	7.88101	https://www.genecards.org/cgi-bin/carddisp.pl?gene=SORD
MIR142	MicroRNA 142	RNA Gene		29	GC17M058331	7.87509	https://www.genecards.org/cgi-bin/carddisp.pl?gene=MIR142
RAD50	RAD50 Double Strand Break Repair Protein	Protein Coding	Q92878	58	GC05P132556	7.86897	https://www.genecards.org/cgi-bin/carddisp.pl?gene=RAD50
FGFR3	Fibroblast Growth Factor Receptor 3	Protein Coding	P22607	63	GC04P003985	7.86486	https://www.genecards.org/cgi-bin/carddisp.pl?gene=FGFR3
SLC33A1	Solute Carrier Family 33 Member 1	Protein Coding	O00400	52	GC03M155821	7.85487	https://www.genecards.org/cgi-bin/carddisp.pl?gene=SLC33A1
PRDM16	PR/SET Domain 16	Protein Coding	Q9HAZ2	53	GC01P020557	7.85089	https://www.genecards.org/cgi-bin/carddisp.pl?gene=PRDM16
TIMP1	TIMP Metallopeptidase Inhibitor 1	Protein Coding	P01033	54	GC0XP057483	7.85013	https://www.genecards.org/cgi-bin/carddisp.pl?gene=TIMP1
BIRC6	Baculoviral IAP Repeat Containing 6	Protein Coding	Q9NR09	48	GC02P032357	7.84969	https://www.genecards.org/cgi-bin/carddisp.pl?gene=BIRC6
PRPF8	Pre-MRNA Processing Factor 8	Protein Coding	Q6P2Q9	50	GC17M001650	7.84764	https://www.genecards.org/cgi-bin/carddisp.pl?gene=PRPF8
EIF2S1	Eukaryotic Translation Initiation Factor 2 Subunit Alpha	Protein Coding	P05198	54	GC14P067359	7.83666	https://www.genecards.org/cgi-bin/carddisp.pl?gene=EIF2S1
USP8	Ubiquitin Specific Peptidase 8	Protein Coding	P40818	55	GC15P050424	7.83662	https://www.genecards.org/cgi-bin/carddisp.pl?gene=USP8
VIPAS39	VPS33B Interacting Protein, Apical-Basolateral Polarity Regulator, Spe-39 Homolog	Protein Coding	Q9H9C1	45	GC14M077426	7.83584	https://www.genecards.org/cgi-bin/carddisp.pl?gene=VIPAS39
COX8C	Cytochrome C Oxidase Subunit 8C	Protein Coding	Q7Z4L0	37	GC14P093348	7.83573	https://www.genecards.org/cgi-bin/carddisp.pl?gene=COX8C
NCOA2	Nuclear Receptor Coactivator 2	Protein Coding	Q15596	53	GC08M070109	7.83257	https://www.genecards.org/cgi-bin/carddisp.pl?gene=NCOA2
PEX11B	Peroxisomal Biogenesis Factor 11 Beta	Protein Coding	O96011	48	GC01M145911	7.8301	https://www.genecards.org/cgi-bin/carddisp.pl?gene=PEX11B
EIF2B5	Eukaryotic Translation Initiation Factor 2B Subunit Epsilon	Protein Coding	Q13144	51	GC03P184135	7.82998	https://www.genecards.org/cgi-bin/carddisp.pl?gene=EIF2B5
SLC7A9	Solute Carrier Family 7 Member 9	Protein Coding	P82251	51	GC19M032830	7.82895	https://www.genecards.org/cgi-bin/carddisp.pl?gene=SLC7A9
GZMB	Granzyme B	Protein Coding	P10144	56	GC14M024630	7.82666	https://www.genecards.org/cgi-bin/carddisp.pl?gene=GZMB
PHYH	Phytanoyl-CoA 2-Hydroxylase	Protein Coding	O14832	52	GC10M013277	7.82405	https://www.genecards.org/cgi-bin/carddisp.pl?gene=PHYH
MCOLN1	Mucolipin TRP Cation Channel 1	Protein Coding	Q9GZU1	52	GC19P112129	7.82334	https://www.genecards.org/cgi-bin/carddisp.pl?gene=MCOLN1
TYR	Tyrosinase	Protein Coding	P14679	57	GC11P089177	7.82207	https://www.genecards.org/cgi-bin/carddisp.pl?gene=TYR
APOL1	Apolipoprotein L1	Protein Coding	O14791	53	GC22P036253	7.82035	https://www.genecards.org/cgi-bin/carddisp.pl?gene=APOL1
GCAT	Glycine C-Acetyltransferase	Protein Coding	O75600	47	GC22P037807	7.81773	https://www.genecards.org/cgi-bin/carddisp.pl?gene=GCAT
PPARGC1B	PPARG Coactivator 1 Beta	Protein Coding	Q86YN6	44	GC05P149730	7.81545	https://www.genecards.org/cgi-bin/carddisp.pl?gene=PPARGC1B
PLN	Phospholamban	Protein Coding	P26678	53	GC06P118548	7.81419	https://www.genecards.org/cgi-bin/carddisp.pl?gene=PLN
LARS2-AS1	LARS2 Antisense RNA 1	RNA Gene		20	GC03M045482	7.81413	https://www.genecards.org/cgi-bin/carddisp.pl?gene=LARS2-AS1
IREB2	Iron Responsive Element Binding Protein 2	Protein Coding	P48200	54	GC15P078437	7.80189	https://www.genecards.org/cgi-bin/carddisp.pl?gene=IREB2
HMGA1	High Mobility Group AT-Hook 1	Protein Coding	P17096	55	GC06P134947	7.79921	https://www.genecards.org/cgi-bin/carddisp.pl?gene=HMGA1
CYP1A1	Cytochrome P450 Family 1 Subfamily A Member 1	Protein Coding	P04798	56	GC15M074719	7.79863	https://www.genecards.org/cgi-bin/carddisp.pl?gene=CYP1A1
ODC1	Ornithine Decarboxylase 1	Protein Coding	P11926	57	GC02M010432	7.79801	https://www.genecards.org/cgi-bin/carddisp.pl?gene=ODC1
TFAP2A	Transcription Factor AP-2 Alpha	Protein Coding	P05549	55	GC06M010393	7.79292	https://www.genecards.org/cgi-bin/carddisp.pl?gene=TFAP2A
TNFAIP3	TNF Alpha Induced Protein 3	Protein Coding	P21580	57	GC06P137866	7.79204	https://www.genecards.org/cgi-bin/carddisp.pl?gene=TNFAIP3
MTIF2P1	Mitochondrial Translational Initiation Factor 2 Pseudogene 1	Pseudogene		8	GC01P123059	7.7848	https://www.genecards.org/cgi-bin/carddisp.pl?gene=MTIF2P1
GJC2	Gap Junction Protein Gamma 2	Protein Coding	Q5T442	50	GC01P231354	7.78007	https://www.genecards.org/cgi-bin/carddisp.pl?gene=GJC2
TRPV4	Transient Receptor Potential Cation Channel Subfamily V Member 4	Protein Coding	Q9HBA0	57	GC12M109783	7.77859	https://www.genecards.org/cgi-bin/carddisp.pl?gene=TRPV4
PAX8	Paired Box 8	Protein Coding	Q06710	53	GC02M113215	7.7782	https://www.genecards.org/cgi-bin/carddisp.pl?gene=PAX8
ACTC1	Actin Alpha Cardiac Muscle 1	Protein Coding	P68032	53	GC15M034790	7.77757	https://www.genecards.org/cgi-bin/carddisp.pl?gene=ACTC1
ERCC1	ERCC Excision Repair 1, Endonuclease Non-Catalytic Subunit	Protein Coding	P07992	54	GC19M092923	7.77505	https://www.genecards.org/cgi-bin/carddisp.pl?gene=ERCC1
MIR30A	MicroRNA 30a	RNA Gene		26	GC06M071403	7.77148	https://www.genecards.org/cgi-bin/carddisp.pl?gene=MIR30A
C3	Complement C3	Protein Coding	P01024	58	GC19M006677	7.77055	https://www.genecards.org/cgi-bin/carddisp.pl?gene=C3
HCRT	Hypocretin Neuropeptide Precursor	Protein Coding	O43612	48	GC17M077709	7.77021	https://www.genecards.org/cgi-bin/carddisp.pl?gene=HCRT
GLI3	GLI Family Zinc Finger 3	Protein Coding	P10071	58	GC07M041960	7.76959	https://www.genecards.org/cgi-bin/carddisp.pl?gene=GLI3
MRPS17P7	Mitochondrial Ribosomal Protein S17 Pseudogene 7	Pseudogene		6	GC18M057763	7.75947	https://www.genecards.org/cgi-bin/carddisp.pl?gene=MRPS17P7
MRPS33P2	Mitochondrial Ribosomal Protein S33 Pseudogene 2	Pseudogene		9	GC04M038008	7.75386	https://www.genecards.org/cgi-bin/carddisp.pl?gene=MRPS33P2
MRPS36P4	Mitochondrial Ribosomal Protein S36 Pseudogene 4	Pseudogene		9	GC11P112208	7.75386	https://www.genecards.org/cgi-bin/carddisp.pl?gene=MRPS36P4
MRPL50P4	Mitochondrial Ribosomal Protein L50 Pseudogene 4	Pseudogene		8	GC10M059551	7.75386	https://www.genecards.org/cgi-bin/carddisp.pl?gene=MRPL50P4
MRPS17P5	Mitochondrial Ribosomal Protein S17 Pseudogene 5	Pseudogene		8	GC06P127909	7.75386	https://www.genecards.org/cgi-bin/carddisp.pl?gene=MRPS17P5
MRPL42P2	Mitochondrial Ribosomal Protein L42 Pseudogene 2	Pseudogene		7	GC06P016916	7.75386	https://www.genecards.org/cgi-bin/carddisp.pl?gene=MRPL42P2
MRPS22P1	Mitochondrial Ribosomal Protein S22 Pseudogene 1	Pseudogene		7	GC0XM087807	7.75386	https://www.genecards.org/cgi-bin/carddisp.pl?gene=MRPS22P1
EDNRB	Endothelin Receptor Type B	Protein Coding	P24530	59	GC13M077895	7.75204	https://www.genecards.org/cgi-bin/carddisp.pl?gene=EDNRB
MIRLET7B	MicroRNA Let-7b	RNA Gene		27	GC22P070828	7.75105	https://www.genecards.org/cgi-bin/carddisp.pl?gene=MIRLET7B
NR1D1	Nuclear Receptor Subfamily 1 Group D Member 1	Protein Coding	P20393	54	GC17M040092	7.74822	https://www.genecards.org/cgi-bin/carddisp.pl?gene=NR1D1
NMTRQ-TTG4-1	Nuclear-Encoded Mitochondrial TRNA-Gln (TTG) 4-1	Pseudogene		4	GC03M106902	7.74805	https://www.genecards.org/cgi-bin/carddisp.pl?gene=NMTRQ-TTG4-1
MRPL15P1	Mitochondrial Ribosomal Protein L15 Pseudogene 1	Pseudogene		10	GC15P089752	7.74765	https://www.genecards.org/cgi-bin/carddisp.pl?gene=MRPL15P1
MRPS10P2	Mitochondrial Ribosomal Protein S10 Pseudogene 2	Pseudogene		10	GC03M004431	7.74765	https://www.genecards.org/cgi-bin/carddisp.pl?gene=MRPS10P2
MRPS21P7	Mitochondrial Ribosomal Protein S21 Pseudogene 7	Pseudogene		10	GC16P049708	7.74765	https://www.genecards.org/cgi-bin/carddisp.pl?gene=MRPS21P7
MRPL20P1	Mitochondrial Ribosomal Protein L20 Pseudogene 1	Pseudogene		9	GC21P036994	7.74765	https://www.genecards.org/cgi-bin/carddisp.pl?gene=MRPL20P1
MRPL36P1	Mitochondrial Ribosomal Protein L36 Pseudogene 1	Pseudogene		9	GC02P070102	7.74765	https://www.genecards.org/cgi-bin/carddisp.pl?gene=MRPL36P1
MRPL42P1	Mitochondrial Ribosomal Protein L42 Pseudogene 1	Pseudogene		9	GC04M119195	7.74765	https://www.genecards.org/cgi-bin/carddisp.pl?gene=MRPL42P1
MRPL9P1	Mitochondrial Ribosomal Protein L9 Pseudogene 1	Pseudogene		9	GC08M076602	7.74765	https://www.genecards.org/cgi-bin/carddisp.pl?gene=MRPL9P1
MRPS18BP1	Mitochondrial Ribosomal Protein S18B Pseudogene 1	Pseudogene		9	GC01M216201	7.74765	https://www.genecards.org/cgi-bin/carddisp.pl?gene=MRPS18BP1
MRPS21P1	Mitochondrial Ribosomal Protein S21 Pseudogene 1	Pseudogene		9	GC01M065092	7.74765	https://www.genecards.org/cgi-bin/carddisp.pl?gene=MRPS21P1
MRPS21P2	Mitochondrial Ribosomal Protein S21 Pseudogene 2	Pseudogene		9	GC01P157861	7.74765	https://www.genecards.org/cgi-bin/carddisp.pl?gene=MRPS21P2
MRPS21P8	Mitochondrial Ribosomal Protein S21 Pseudogene 8	Pseudogene		9	GC16P082204	7.74765	https://www.genecards.org/cgi-bin/carddisp.pl?gene=MRPS21P8
MRPS36P1	Mitochondrial Ribosomal Protein S36 Pseudogene 1	Pseudogene		9	GC03M006789	7.74765	https://www.genecards.org/cgi-bin/carddisp.pl?gene=MRPS36P1
MRPS36P3	Mitochondrial Ribosomal Protein S36 Pseudogene 3	Pseudogene		9	GC08P122091	7.74765	https://www.genecards.org/cgi-bin/carddisp.pl?gene=MRPS36P3
MRPL42P3	Mitochondrial Ribosomal Protein L42 Pseudogene 3	Pseudogene		8	GC06P144136	7.74765	https://www.genecards.org/cgi-bin/carddisp.pl?gene=MRPL42P3
MRPL42P4	Mitochondrial Ribosomal Protein L42 Pseudogene 4	Pseudogene		8	GC07M047026	7.74765	https://www.genecards.org/cgi-bin/carddisp.pl?gene=MRPL42P4
MRPL51P2	Mitochondrial Ribosomal Protein L51 Pseudogene 2	Pseudogene		8	GC21M043115	7.74765	https://www.genecards.org/cgi-bin/carddisp.pl?gene=MRPL51P2
MRPL53P1	Mitochondrial Ribosomal Protein L53 Pseudogene 1	Pseudogene		8	GC01M112625	7.74765	https://www.genecards.org/cgi-bin/carddisp.pl?gene=MRPL53P1
MRPS10P1	Mitochondrial Ribosomal Protein S10 Pseudogene 1	Pseudogene		8	GC01P169990	7.74765	https://www.genecards.org/cgi-bin/carddisp.pl?gene=MRPS10P1
MRPS16P1	Mitochondrial Ribosomal Protein S16 Pseudogene 1	Pseudogene		8	GC08P091917	7.74765	https://www.genecards.org/cgi-bin/carddisp.pl?gene=MRPS16P1
MRPS16P3	Mitochondrial Ribosomal Protein S16 Pseudogene 3	Pseudogene		8	GC22P070471	7.74765	https://www.genecards.org/cgi-bin/carddisp.pl?gene=MRPS16P3
MRPS17P1	Mitochondrial Ribosomal Protein S17 Pseudogene 1	Pseudogene		8	GC01M045108	7.74765	https://www.genecards.org/cgi-bin/carddisp.pl?gene=MRPS17P1
MRPS21P3	Mitochondrial Ribosomal Protein S21 Pseudogene 3	Pseudogene		8	GC01P197364	7.74765	https://www.genecards.org/cgi-bin/carddisp.pl?gene=MRPS21P3
MRPS21P5	Mitochondrial Ribosomal Protein S21 Pseudogene 5	Pseudogene		8	GC10P028004	7.74765	https://www.genecards.org/cgi-bin/carddisp.pl?gene=MRPS21P5
MRPS21P9	Mitochondrial Ribosomal Protein S21 Pseudogene 9	Pseudogene		8	GC17M050450	7.74765	https://www.genecards.org/cgi-bin/carddisp.pl?gene=MRPS21P9
MRPS33P1	Mitochondrial Ribosomal Protein S33 Pseudogene 1	Pseudogene		8	GC01M154377	7.74765	https://www.genecards.org/cgi-bin/carddisp.pl?gene=MRPS33P1
MRPS35P2	Mitochondrial Ribosomal Protein S35 Pseudogene 2	Pseudogene		8	GC05M098402	7.74765	https://www.genecards.org/cgi-bin/carddisp.pl?gene=MRPS35P2
MRPS5P3	Mitochondrial Ribosomal Protein S5 Pseudogene 3	Pseudogene		8	GC05M127142	7.74765	https://www.genecards.org/cgi-bin/carddisp.pl?gene=MRPS5P3
MRPS6P4	Mitochondrial Ribosomal Protein S6 Pseudogene 4	Pseudogene		8	GC12P089319	7.74765	https://www.genecards.org/cgi-bin/carddisp.pl?gene=MRPS6P4
MRPL35P1	Mitochondrial Ribosomal Protein L35 Pseudogene 1	Pseudogene		7	GC06P014018	7.74765	https://www.genecards.org/cgi-bin/carddisp.pl?gene=MRPL35P1
MRPL42P5	Mitochondrial Ribosomal Protein L42 Pseudogene 5	Pseudogene		7	GC15M040531	7.74765	https://www.genecards.org/cgi-bin/carddisp.pl?gene=MRPL42P5
MRPS23P1	Mitochondrial Ribosomal Protein S23 Pseudogene 1	Pseudogene		7	GC07P045153	7.74765	https://www.genecards.org/cgi-bin/carddisp.pl?gene=MRPS23P1
MRPS33P3	Mitochondrial Ribosomal Protein S33 Pseudogene 3	Pseudogene		7	GC04P115143	7.74765	https://www.genecards.org/cgi-bin/carddisp.pl?gene=MRPS33P3
MRPL22P1	Mitochondrial Ribosomal Protein L22 Pseudogene 1	Pseudogene		6	GC04M056320	7.74765	https://www.genecards.org/cgi-bin/carddisp.pl?gene=MRPL22P1
MRPL30P1	Mitochondrial Ribosomal Protein L30 Pseudogene 1	Pseudogene		6	GC06P057029	7.74765	https://www.genecards.org/cgi-bin/carddisp.pl?gene=MRPL30P1
MRPL35P4	Mitochondrial Ribosomal Protein L35 Pseudogene 4	Pseudogene		6	GC0XM014949	7.74765	https://www.genecards.org/cgi-bin/carddisp.pl?gene=MRPL35P4
MRPL3P1	Mitochondrial Ribosomal Protein L3 Pseudogene 1	Pseudogene		6	GC13M019304	7.74765	https://www.genecards.org/cgi-bin/carddisp.pl?gene=MRPL3P1
MRPL45P1	Mitochondrial Ribosomal Protein L45 Pseudogene 1	Pseudogene		6	GC02M088613	7.74765	https://www.genecards.org/cgi-bin/carddisp.pl?gene=MRPL45P1
MRPL49P1	Mitochondrial Ribosomal Protein L49 Pseudogene 1	Pseudogene		6	GC05P064674	7.74765	https://www.genecards.org/cgi-bin/carddisp.pl?gene=MRPL49P1
MRPL50P2	Mitochondrial Ribosomal Protein L50 Pseudogene 2	Pseudogene		6	GC02M203315	7.74765	https://www.genecards.org/cgi-bin/carddisp.pl?gene=MRPL50P2
MRPL50P3	Mitochondrial Ribosomal Protein L50 Pseudogene 3	Pseudogene		6	GC05P178344	7.74765	https://www.genecards.org/cgi-bin/carddisp.pl?gene=MRPL50P3
MRPS15P1	Mitochondrial Ribosomal Protein S15 Pseudogene 1	Pseudogene		6	GC15M073483	7.74765	https://www.genecards.org/cgi-bin/carddisp.pl?gene=MRPS15P1
MRPS17P9	Mitochondrial Ribosomal Protein S17 Pseudogene 9	Pseudogene		6	GC0XP120075	7.74765	https://www.genecards.org/cgi-bin/carddisp.pl?gene=MRPS17P9
MRPS24P1	Mitochondrial Ribosomal Protein S24 Pseudogene 1	Pseudogene		6	GC11M000303	7.74765	https://www.genecards.org/cgi-bin/carddisp.pl?gene=MRPS24P1
MRPS25P1	Mitochondrial Ribosomal Protein S25 Pseudogene 1	Pseudogene		6	GC04P080321	7.74765	https://www.genecards.org/cgi-bin/carddisp.pl?gene=MRPS25P1
MRPS31P1	Mitochondrial Ribosomal Protein S31 Pseudogene 1	Pseudogene		6	GC03P041189	7.74765	https://www.genecards.org/cgi-bin/carddisp.pl?gene=MRPS31P1
MRPS33P4	Mitochondrial Ribosomal Protein S33 Pseudogene 4	Pseudogene		6	GC20P052511	7.74765	https://www.genecards.org/cgi-bin/carddisp.pl?gene=MRPS33P4
MRPS36P6	Mitochondrial Ribosomal Protein S36 Pseudogene 6	Pseudogene		6	GC20M013405	7.74765	https://www.genecards.org/cgi-bin/carddisp.pl?gene=MRPS36P6
MRPS6P2	Mitochondrial Ribosomal Protein S6 Pseudogene 2	Pseudogene		6	GC01P050846	7.74765	https://www.genecards.org/cgi-bin/carddisp.pl?gene=MRPS6P2
MRPS7P2	Mitochondrial Ribosomal Protein S7 Pseudogene 2	Pseudogene		6	GC12P039281	7.74765	https://www.genecards.org/cgi-bin/carddisp.pl?gene=MRPS7P2
MRPL11P3	Mitochondrial Ribosomal Protein L11 Pseudogene 3	Pseudogene		5	GC12M078473	7.74765	https://www.genecards.org/cgi-bin/carddisp.pl?gene=MRPL11P3
MRPL30P2	Mitochondrial Ribosomal Protein L30 Pseudogene 2	Pseudogene		5	GC12P039601	7.74765	https://www.genecards.org/cgi-bin/carddisp.pl?gene=MRPL30P2
MRPS10P5	Mitochondrial Ribosomal Protein S10 Pseudogene 5	Pseudogene		5	GC09M037836	7.74765	https://www.genecards.org/cgi-bin/carddisp.pl?gene=MRPS10P5
MRPS21P4	Mitochondrial Ribosomal Protein S21 Pseudogene 4	Pseudogene		5	GC09P036410	7.74765	https://www.genecards.org/cgi-bin/carddisp.pl?gene=MRPS21P4
MRPL14P1	Mitochondrial Ribosomal Protein L14 Pseudogene 1	Pseudogene		4	GC17P110866	7.74765	https://www.genecards.org/cgi-bin/carddisp.pl?gene=MRPL14P1
MRPS15P2	Mitochondrial Ribosomal Protein S15 Pseudogene 2	Pseudogene		4	GC19P044290	7.74765	https://www.genecards.org/cgi-bin/carddisp.pl?gene=MRPS15P2
MRPS17P6	Mitochondrial Ribosomal Protein S17 Pseudogene 6	Pseudogene		4	GC14P021291	7.74765	https://www.genecards.org/cgi-bin/carddisp.pl?gene=MRPS17P6
PTK2	Protein Tyrosine Kinase 2	Protein Coding	Q05397	56	GC08M140657	7.74212	https://www.genecards.org/cgi-bin/carddisp.pl?gene=PTK2
PRKAA2	Protein Kinase AMP-Activated Catalytic Subunit Alpha 2	Protein Coding	P54646	58	GC01P056645	7.73577	https://www.genecards.org/cgi-bin/carddisp.pl?gene=PRKAA2
GPT2	Glutamic--Pyruvic Transaminase 2	Protein Coding	Q8TD30	54	GC16P082088	7.73186	https://www.genecards.org/cgi-bin/carddisp.pl?gene=GPT2
DCLRE1C	DNA Cross-Link Repair 1C	Protein Coding	Q96SD1	53	GC10M014897	7.73157	https://www.genecards.org/cgi-bin/carddisp.pl?gene=DCLRE1C
ALKBH7	AlkB Homolog 7	Protein Coding	Q9BT30	37	GC19P006372	7.72826	https://www.genecards.org/cgi-bin/carddisp.pl?gene=ALKBH7
USP7	Ubiquitin Specific Peptidase 7	Protein Coding	Q93009	57	GC16M008892	7.72505	https://www.genecards.org/cgi-bin/carddisp.pl?gene=USP7
GH1	Growth Hormone 1	Protein Coding	P01241	52	GC17M063917	7.7247	https://www.genecards.org/cgi-bin/carddisp.pl?gene=GH1
CHI3L1	Chitinase 3 Like 1	Protein Coding	P36222	54	GC01M203148	7.7203	https://www.genecards.org/cgi-bin/carddisp.pl?gene=CHI3L1
TMEM165	Transmembrane Protein 165	Protein Coding	Q9HC07	46	GC04P055395	7.71541	https://www.genecards.org/cgi-bin/carddisp.pl?gene=TMEM165
UGT1A1	UDP Glucuronosyltransferase Family 1 Member A1	Protein Coding	P22309	59	GC02P233760	7.71275	https://www.genecards.org/cgi-bin/carddisp.pl?gene=UGT1A1
TMPO	Thymopoietin	Protein Coding	P42166	55	GC12P098515	7.71055	https://www.genecards.org/cgi-bin/carddisp.pl?gene=TMPO
MLH1	MutL Homolog 1	Protein Coding	P40692	58	GC03P036993	7.71008	https://www.genecards.org/cgi-bin/carddisp.pl?gene=MLH1
FTL	Ferritin Light Chain	Protein Coding	P02792	55	GC19P048965	7.70959	https://www.genecards.org/cgi-bin/carddisp.pl?gene=FTL
MAP1LC3B	Microtubule Associated Protein 1 Light Chain 3 Beta	Protein Coding	Q9GZQ8	50	GC16P095222	7.70854	https://www.genecards.org/cgi-bin/carddisp.pl?gene=MAP1LC3B
PIK3C2A	Phosphatidylinositol-4-Phosphate 3-Kinase Catalytic Subunit Type 2 Alpha	Protein Coding	O00443	55	GC11M017940	7.70792	https://www.genecards.org/cgi-bin/carddisp.pl?gene=PIK3C2A
RMRPP5	RNA Component Of Mitochondrial RNA Processing Endoribonuclease Pseudogene 5	Pseudogene		8	GC09P024907	7.70247	https://www.genecards.org/cgi-bin/carddisp.pl?gene=RMRPP5
[truncated: 5,601 more rows]
