# Supplementary material for: Protein interactions, network pharmacology, and machine learning work together to predict genes linked to mitochondrial dysfunction in hypertrophic cardiomyopathy
Source: Research Square preprint supplement (doi:10.21203/rs.3.rs-5122992/v1), 2025-03-24
Supplement: Supplementary file 4 [file b7403d3edc6ac0aee5e3f00c.docx]

**Supplementary Materials Legend description**

**Supplementary Figure 1** |(A, B) Box plots of Fragments Per Kilobase of transcript per Million mapped reads (FPKM) for each sample before and after data cleaning. (C-N) The scatterplot in the other 12 modules shows how membership (MM) and gene significance (GS) are related.

**Supplementary Figure 2 |** (A, B) SHapley Additive exPlanations (SHAP) summary plots showing variable importance for XGBoost and LightGBM, respectively. (C) Plots of SHAP values with interactions from the XGBoost model are displayed in the image. (D, E) The scatterplot displays the CEBPD's SHAP dependence tree for the two models, LightGBM and XGBoost, respectively.

**Supplementary Table 1|**7600 genes related mitochondrial dysfunction from GeneCards.

**Supplementary Table 2|** The sequences of primers are displayed.

**Supplementary Table 3|** The table shows the screened blue module genes and the corresponding membership (MM) _R, membership (MM) _pvalue, gene significance (GS)_R and gene significance (GS) pvalue.

**Supplementary Material 1|**Code related to this article in R.
