# Supplementary material for: Protein interactions, network pharmacology, and machine learning work together to predict genes linked to mitochondrial dysfunction in hypertrophic cardiomyopathy
Source: Research Square preprint supplement (doi:10.21203/rs.3.rs-5122992/v1), 2025-03-24
Supplement: Supplementary file 5 [file dc9ce7d54e60ea6a996d844b.xlsx]

## Sheet: Sheet1
Gene	Module	MM_R	MM_pvalue	GS_R	GS_pvalue
PRKAA2	black	0.83607	4.13187e-39	0.366367	5.84131e-06
MEOX2	black	0.824234	3.85676e-37	0.398825	6.74146e-07
ZBTB44	black	0.828545	7.69451e-38	0.218183	0.0083798
HOMER1	black	0.801163	1.0783e-33	0.48197	8.36569e-10
RAD21	black	0.851923	5.20995e-42	0.399251	6.5428e-07
SMARCA5	black	0.824977	2.92959e-37	0.346348	1.97834e-05
GKAP1	black	0.830797	3.25585e-38	0.212527	0.0102761
C1GALT1	black	0.824071	4.09549e-37	0.272874	0.000898097
TUBE1	black	0.829027	6.40658e-38	0.377374	2.88207e-06
FBXO30	black	0.805884	2.31935e-34	0.382685	2.03065e-06
UBE4A	black	0.849039	1.85769e-41	0.230173	0.00535019
SPHAR	black	0.816047	7.31813e-36	0.211271	0.0107452
ECHDC1	black	0.84156	4.44925e-40	0.24018	0.00361616
MRPL19	black	0.806292	2.02651e-34	0.244327	0.00306005
NID2	black	0.800931	1.16179e-33	0.177669	0.0325211
TMEM14B	black	0.811726	3.26354e-35	0.328413	5.5111e-05
DCTN4	black	0.823117	5.81416e-37	0.329369	5.22636e-05
ACTR6	black	0.836355	3.68741e-39	0.407424	3.65696e-07
PSIP1	black	0.83373	1.04197e-38	0.538659	2.77594e-12
THUMPD1	black	0.817531	4.34091e-36	0.213678	0.00986215
TSPAN12	black	0.823278	5.48003e-37	0.52066	1.90792e-11
SUB1	black	0.858532	2.54964e-43	0.475788	1.46673e-09
KBTBD7	black	0.813888	1.55224e-35	0.476082	1.42853e-09
RAB33B	black	0.837569	2.26728e-39	0.27771	0.00071987
TMEM106B	black	0.851551	6.14716e-42	0.287841	0.000446984
PLEKHA5	black	0.81474	1.15495e-35	0.371705	4.16038e-06
HMGB2	black	0.801206	1.06343e-33	0.665261	7.0679e-20
FCHO2	black	0.805516	2.6182e-34	0.261734	0.00147255
FKBP3	black	0.897678	9.4513e-53	0.390617	1.18973e-06
APPL1	black	0.82895	6.59788e-38	0.304771	0.000193595
MED21	black	0.838349	1.65498e-39	0.171231	0.0394677
RNASEH2B	black	0.820295	1.6189e-36	0.213041	0.0100892
TTC33	black	0.828774	7.05209e-38	0.383655	1.90348e-06
VWA8	black	0.825207	2.69018e-37	0.387142	1.50632e-06
SEPTIN7	black	0.878011	1.32e-47	0.237813	0.00397292
TOGARAM1	black	0.925146	5.03928e-62	0.445843	1.91161e-08
SERPINE1	blue	0.898498	5.47677e-53	-0.65281	5.73194e-19
SEC61A1	blue	0.831522	2.46121e-38	-0.690376	7.52831e-22
HCLS1	blue	0.903916	1.32162e-54	-0.7646	4.54244e-29
LMNB2	blue	0.849278	1.6735e-41	-0.656691	3.01701e-19
FKBP5	blue	0.834892	6.59397e-39	-0.805258	2.85065e-34
IFI30	blue	0.851667	5.8394e-42	-0.736645	4.58984e-26
SNRPB	blue	0.889663	1.54735e-50	-0.698946	1.43521e-22
TEAD4	blue	0.90293	2.64517e-54	-0.685992	1.71924e-21
IFITM3	blue	0.857404	4.31299e-43	-0.766064	3.07998e-29
TKT	blue	0.887354	6.24769e-50	-0.743593	8.94642e-27
SLC12A9	blue	0.837218	2.61054e-39	-0.742173	1.25497e-26
RHBDF2	blue	0.826073	1.9491e-37	-0.750137	1.82562e-27
CD59	blue	0.821204	1.16662e-36	-0.651236	7.41598e-19
SORBS1	blue	-0.842816	2.64115e-40	0.735428	6.08073e-26
GPRASP2	blue	-0.811465	3.56724e-35	0.65288	5.66647e-19
RASSF1	blue	0.861084	7.62866e-44	-0.735195	6.41594e-26
LY96	blue	0.865053	1.11298e-44	-0.618977	1.06135e-16
TUBA3D	blue	0.825151	2.74735e-37	-0.857626	3.88987e-43
MT2A	blue	0.839259	1.14374e-39	-0.750008	1.8844e-27
MT1A	blue	0.803405	5.22394e-34	-0.774222	3.34955e-30
NFKBIZ	blue	0.828581	7.58936e-38	-0.789141	4.50866e-32
LRRC49	blue	-0.826705	1.53929e-37	0.712983	8.34215e-24
CFL1	blue	0.814982	1.0618e-35	-0.588728	6.81413e-15
GATAD2A	blue	0.845418	8.82775e-41	-0.585021	1.10182e-14
SORBS2	blue	-0.867177	3.87399e-45	0.781983	3.71656e-31
NT5DC3	blue	0.813905	1.54313e-35	-0.620662	8.30649e-17
FPR1	blue	0.922162	7.40394e-61	-0.811547	3.46878e-35
RASSF2	blue	0.806498	1.89329e-34	-0.592485	4.16035e-15
VAMP8	blue	0.862847	3.26818e-44	-0.743628	8.87024e-27
CCND2	blue	-0.827979	9.53043e-38	0.740639	1.80426e-26
ARHGDIA	blue	0.838801	1.37803e-39	-0.619847	9.35273e-17
MBP	blue	-0.825647	2.28512e-37	0.744392	7.387e-27
EIF4A1	blue	0.855535	1.02056e-42	-0.606942	5.86194e-16
S100A9	blue	0.911856	3.69992e-57	-0.837163	2.66911e-39
CMTM7	blue	0.921603	1.20977e-60	-0.796991	4.05248e-33
SCN2B	blue	-0.865919	7.25466e-45	0.793762	1.10584e-32
ATP1A2	blue	-0.855085	1.25317e-42	0.688445	1.08491e-21
METTL7B	blue	0.850334	1.05309e-41	-0.696504	2.31496e-22
MT1M	blue	0.836044	4.1743e-39	-0.833363	1.20292e-38
TYROBP	blue	0.847758	3.23875e-41	-0.702422	7.20472e-23
SVIL	blue	-0.825293	2.60614e-37	0.724368	7.30291e-25
PRKCD	blue	0.848846	2.02053e-41	-0.825988	2.01246e-37
CRYM	blue	-0.838374	1.63819e-39	0.702512	7.07758e-23
BRMS1	blue	0.81805	3.6108e-36	-0.576557	3.22801e-14
CEBPB	blue	0.825933	2.05383e-37	-0.747253	3.69993e-27
LTBR	blue	0.812548	2.46348e-35	-0.703549	5.7508e-23
HGS	blue	0.816477	6.29256e-36	-0.663434	9.6695e-20
MARCO	blue	0.85039	1.02749e-41	-0.710819	1.3079e-23
HES6	blue	0.875845	4.28746e-47	-0.735122	6.52445e-26
SERPINH1	blue	0.867313	3.6183e-45	-0.684764	2.16106e-21
ARPC4	blue	0.866196	6.3224e-45	-0.642824	2.86471e-18
YPEL2	blue	-0.824564	3.41416e-37	0.819481	2.16856e-36
DOCK2	blue	0.827907	9.79371e-38	-0.749069	2.37422e-27
S100A8	blue	0.883618	5.61237e-49	-0.800632	1.27843e-33
TUBB	blue	0.831584	2.40314e-38	-0.729996	2.09326e-25
ERRFI1	blue	0.829547	5.25553e-38	-0.697122	2.05211e-22
GPR4	blue	0.809731	6.42453e-35	-0.674533	1.392e-20
CEBPD	blue	0.811381	3.67074e-35	-0.865582	8.57476e-45
MAFB	blue	0.8806	3.13285e-48	-0.79743	3.53017e-33
LHFPL2	blue	0.833874	9.84591e-39	-0.62503	4.36928e-17
SPPL2A	blue	0.806754	1.73937e-34	-0.601589	1.22517e-15
INTU	blue	-0.806184	2.10057e-34	0.729643	2.26605e-25
SLC7A7	blue	0.811307	3.76454e-35	-0.613778	2.24052e-16
CTSC	blue	0.961656	3.14161e-82	-0.781451	4.33263e-31
CD163	blue	0.93083	2.1821e-64	-0.821493	1.05051e-36
CSNK1D	blue	0.880853	2.71614e-48	-0.716126	4.3099e-24
RRBP1	blue	0.835235	5.75787e-39	-0.664537	8.00475e-20
CD14	blue	0.819634	2.05303e-36	-0.745955	5.06932e-27
STXBP2	blue	0.808299	1.03946e-34	-0.645287	1.93703e-18
PRKCQ	blue	0.801454	9.81985e-34	-0.645894	1.75812e-18
S100A11	blue	0.894024	1.01577e-51	-0.636721	7.44118e-18
EYA1	blue	-0.802563	6.86653e-34	0.641393	3.59025e-18
LYPLAL1	blue	-0.858183	3.00111e-43	0.738559	2.94064e-26
HCK	blue	0.890635	8.51526e-51	-0.771949	6.27235e-30
ANXA2	blue	0.83094	3.08121e-38	-0.53799	2.98816e-12
HCST	blue	0.823318	5.40129e-37	-0.658994	2.05211e-19
ITGB2	blue	0.8683	2.20095e-45	-0.768738	1.50345e-29
FKBP11	blue	0.885214	2.21864e-49	-0.669811	3.20792e-20
MYH7B	blue	-0.822368	7.64363e-37	0.60225	1.11931e-15
ANKMY2	blue	-0.846461	5.65768e-41	0.728099	3.20039e-25
LAPTM5	blue	0.915517	2.0354e-58	-0.748726	2.58227e-27
FYCO1	blue	-0.857262	4.60532e-43	0.644283	2.27319e-18
FCN3	blue	0.848027	2.88268e-41	-0.835259	5.70289e-39
IFITM2	blue	0.87384	1.25121e-46	-0.770914	8.32736e-30
FBP1	blue	0.807942	1.17132e-34	-0.658145	2.36629e-19
ZFP36	blue	0.832368	1.77353e-38	-0.863002	3.03201e-44
SERPINA3	blue	0.898864	4.28647e-53	-0.846681	5.14838e-41
TOMM40	blue	0.801414	9.94788e-34	-0.705	4.29411e-23
ADAMTS9	blue	0.828616	7.48974e-38	-0.61741	1.3313e-16
SLC1A5	blue	0.826734	1.52273e-37	-0.686678	1.51209e-21
MVP	blue	0.853117	3.05452e-42	-0.738982	2.66332e-26
YPEL1	blue	-0.827859	9.97437e-38	0.72562	5.54552e-25
GALK1	blue	0.863621	2.24476e-44	-0.790261	3.2181e-32
TUBA1A	blue	0.800738	1.23576e-33	-0.61064	3.49408e-16
CDC42EP4	blue	0.821944	8.91788e-37	-0.854223	1.85467e-42
NNMT	blue	0.841013	5.57767e-40	-0.750331	1.74025e-27
RCC2	blue	0.816992	5.24938e-36	-0.597649	2.0894e-15
IL13RA1	blue	0.855791	9.07467e-43	-0.759089	1.91383e-28
MAP3K6	blue	0.831447	2.53388e-38	-0.830796	3.25681e-38
CD248	blue	0.836942	2.91685e-39	-0.767408	2.15044e-29
SH3BGRL3	blue	0.924727	7.39568e-62	-0.695651	2.73294e-22
CORO1A	blue	0.894328	8.36618e-52	-0.785696	1.25706e-31
MYC	blue	0.897927	8.00852e-53	-0.803421	5.19716e-34
IRAK3	blue	0.836736	3.16716e-39	-0.711735	1.08194e-23
ZYX	blue	0.905902	3.19189e-55	-0.679267	5.9346e-21
ACTB	blue	0.839439	1.06309e-39	-0.646487	1.59876e-18
GFPT2	blue	0.84556	8.31276e-41	-0.71357	7.38044e-24
FES	blue	0.874995	6.76765e-47	-0.793898	1.06018e-32
LCP1	blue	0.88876	2.68128e-50	-0.76604	3.10021e-29
TNFRSF1A	blue	0.894227	8.92454e-52	-0.685309	1.95254e-21
LYN	blue	0.82862	7.47697e-38	-0.635485	9.00525e-18
CYBA	blue	0.866472	5.51072e-45	-0.750079	1.85198e-27
SLC16A3	blue	0.842972	2.47453e-40	-0.604118	8.66353e-16
WAS	blue	0.896976	1.50101e-52	-0.770176	1.01819e-29
ENO1	blue	0.859407	1.69034e-43	-0.689091	9.60351e-22
RANGAP1	blue	0.896947	1.53007e-52	-0.767233	2.25367e-29
CAP1	blue	0.856379	6.92579e-43	-0.599412	1.64689e-15
GNA15	blue	0.856832	5.61997e-43	-0.7284	2.99305e-25
RPN1	blue	0.851556	6.13522e-42	-0.663955	8.8455e-20
JAK2	blue	-0.826876	1.44337e-37	0.794814	7.98783e-33
S100A3	blue	0.847482	3.64956e-41	-0.592906	3.935e-15
TBXAS1	blue	0.842779	2.68221e-40	-0.686441	1.5809e-21
ATP1A1	blue	0.869671	1.09589e-45	-0.683197	2.88853e-21
STAT3	blue	0.856593	6.27647e-43	-0.776178	1.94039e-30
SLC35F1	blue	-0.849758	1.35607e-41	0.6617	1.29928e-19
GLIPR1	blue	0.821406	1.08423e-36	-0.616689	1.47719e-16
AQP9	blue	0.820202	1.6741e-36	-0.60929	4.22371e-16
S100A10	blue	0.847553	3.53886e-41	-0.743925	8.26116e-27
ALOX5	blue	0.899778	2.31631e-53	-0.783444	2.43187e-31
C1QB	blue	0.809314	7.39508e-35	-0.748693	2.60343e-27
TNFAIP8L3	blue	0.807196	1.50205e-34	-0.565881	1.19932e-13
ALOX5AP	blue	0.869035	1.51596e-45	-0.742202	1.24617e-26
CBX7	blue	-0.838752	1.40574e-39	0.662435	1.14666e-19
DCUN1D3	blue	0.810001	5.86507e-35	-0.714099	6.60507e-24
DCUN1D2	blue	-0.812182	2.79209e-35	0.606607	6.14117e-16
SLCO4A1	blue	0.82394	4.29789e-37	-0.787077	8.35257e-32
SLC7A1	blue	0.851663	5.85024e-42	-0.705982	3.52123e-23
ZNF415	blue	-0.816115	7.14555e-36	0.749917	1.92715e-27
FGD2	blue	0.803789	4.61052e-34	-0.746036	4.97007e-27
TSPAN32	blue	-0.812662	2.36821e-35	0.637233	6.8741e-18
HAVCR2	blue	0.911518	4.80638e-57	-0.740801	1.73655e-26
DUSP23	blue	0.850909	8.17057e-42	-0.703354	5.98003e-23
OMA1	blue	-0.86122	7.14801e-44	0.693433	4.19556e-22
FCER1G	blue	0.896664	1.84249e-52	-0.808081	1.11799e-34
SLC39A1	blue	0.864224	1.67267e-44	-0.711602	1.11207e-23
C5AR1	blue	0.805899	2.30772e-34	-0.641278	3.65622e-18
ITGA5	blue	0.830354	3.85953e-38	-0.565532	1.25094e-13
CD68	blue	0.871648	3.95366e-46	-0.745276	5.9717e-27
VSIG4	blue	0.85098	7.92052e-42	-0.714465	6.11755e-24
SMYD2	blue	-0.808431	9.94703e-35	0.765409	3.666e-29
FRMD5	blue	-0.865174	1.04854e-44	0.692645	4.88158e-22
SRGN	blue	0.835768	4.65902e-39	-0.742573	1.14102e-26
ARPC1B	blue	0.886437	1.07904e-49	-0.772598	5.24839e-30
ISG20	blue	0.806005	2.22842e-34	-0.643411	2.61062e-18
SFRP1	blue	-0.879343	6.32248e-48	0.704378	4.86777e-23
RHOG	blue	0.838267	1.71058e-39	-0.634888	9.87055e-18
CLIC1	blue	0.857538	4.05169e-43	-0.627989	2.81131e-17
RGS19	blue	0.883292	6.77311e-49	-0.679842	5.34437e-21
SLC7A5	blue	0.804277	3.93096e-34	-0.628696	2.5282e-17
PTBP1	blue	0.854722	1.47872e-42	-0.645918	1.7514e-18
NXT1	blue	0.805714	2.45337e-34	-0.599675	1.5893e-15
LRRC8A	blue	0.882113	1.33104e-48	-0.747463	3.5155e-27
EMP3	blue	0.835436	5.317e-39	-0.597573	2.11092e-15
PFN1	blue	0.835824	4.55628e-39	-0.573239	4.8783e-14
INPP1	blue	0.850757	8.73914e-42	-0.760107	1.47154e-28
ADAP2	blue	0.865422	9.27978e-45	-0.711229	1.20154e-23
ATL3	blue	0.873795	1.282e-46	-0.665718	6.53265e-20
BATF3	blue	0.826277	1.80625e-37	-0.702358	7.29764e-23
CAPRIN1	blue	-0.823172	5.69833e-37	0.699588	1.26448e-22
ELL2	blue	0.834416	7.95749e-39	-0.68475	2.16639e-21
FAM110B	blue	-0.84435	1.3875e-40	0.741711	1.40025e-26
HLTF	blue	-0.840571	6.68833e-40	0.690863	6.86132e-22
KLHDC9	blue	-0.859126	1.92938e-43	0.686053	1.69981e-21
LYVE1	blue	0.832282	1.83371e-38	-0.820786	1.35645e-36
MFSD10	blue	0.870116	8.72394e-46	-0.75848	2.23782e-28
NACC2	blue	0.811222	3.87551e-35	-0.657094	2.82073e-19
PIK3IP1	blue	-0.813016	2.09739e-35	0.804625	3.50793e-34
PLIN2	blue	0.802117	7.9301e-34	-0.622461	6.38293e-17
RBM20	blue	-0.851755	5.61501e-42	0.615354	1.78911e-16
SAT1	blue	0.809328	7.35931e-35	-0.578634	2.48669e-14
TMEM189	blue	0.80918	7.73378e-35	-0.68715	1.3842e-21
TUBA1B	blue	0.851705	5.74143e-42	-0.716749	3.77674e-24
TUBA1C	blue	0.827982	9.51948e-38	-0.698987	1.42351e-22
TUBA3C	blue	0.85617	7.62448e-43	-0.864555	1.42201e-44
TUBA3E	blue	0.837394	2.43285e-39	-0.870985	5.57672e-46
TYMP	blue	0.856648	6.11916e-43	-0.697007	2.09876e-22
VWC2	blue	-0.846484	5.60321e-41	0.664346	8.27194e-20
CSRNP1	blue	0.816668	5.88527e-36	-0.841457	4.64291e-40
POGLUT1	blue	0.834456	7.83233e-39	-0.647574	1.34261e-18
PNP	blue	0.816682	5.8559e-36	-0.54974	7.99521e-13
PLIN3	blue	0.897321	1.1962e-52	-0.733645	9.15437e-26
SLC52A2	blue	0.917498	4.01032e-59	-0.733466	9.53626e-26
NABP1	blue	0.836543	3.42144e-39	-0.647837	1.28679e-18
PPP1R18	blue	0.813318	1.88974e-35	-0.591776	4.56824e-15
ADGRE5	blue	0.887863	4.6071e-50	-0.781161	4.71083e-31
ADGRG1	blue	0.832663	1.58085e-38	-0.740782	1.74467e-26
MCUB	blue	0.857259	4.61213e-43	-0.605854	6.81664e-16
ATP5IF1	blue	-0.848312	2.54855e-41	0.735212	6.38986e-26
HJV	blue	-0.858905	2.14026e-43	0.663142	1.01643e-19
NIBAN2	blue	0.847589	3.48374e-41	-0.630976	1.7925e-17
DHTKD1	brown	0.860347	1.08343e-43	0.380232	2.38893e-06
GALNT11	brown	0.887069	7.40842e-50	0.34717	1.88463e-05
EPM2A	brown	0.802426	7.1783e-34	0.309044	0.000155459
ZNF142	brown	0.822373	7.62918e-37	0.163873	0.0488903
TMEM106C	brown	0.822195	8.14059e-37	0.29209	0.000364055
HDHD2	brown	0.83093	3.09275e-38	0.241439	0.00343842
ZBTB3	brown	0.835619	4.94399e-39	0.256488	0.00184537
KIF1C	brown	0.832551	1.65187e-38	0.200842	0.0154241
HIGD2A	brown	0.868763	1.74076e-45	0.334699	3.87603e-05
SETDB2	brown	0.841398	4.75867e-40	0.292997	0.000348323
MRPL16	brown	0.808012	1.14434e-34	0.266717	0.00118341
RBBP7	brown	0.808416	9.99518e-35	0.385396	1.69413e-06
PKIG	brown	0.829756	4.85179e-38	0.462276	4.81738e-09
GLRX	brown	0.806303	2.01966e-34	0.290155	0.00039988
ADH5	brown	0.867858	2.75222e-45	0.404553	4.49407e-07
ZNF436	brown	0.825257	2.64075e-37	0.252766	0.00215983
EIF3L	brown	0.806264	2.04567e-34	0.267748	0.00113046
GLE1	brown	0.835813	4.57748e-39	0.184575	0.0262514
TSR2	brown	0.837633	2.20964e-39	0.189316	0.0225723
TTC37	brown	0.824843	3.07963e-37	0.498412	1.7772e-10
PPP1R21	brown	0.83276	1.5226e-38	0.282694	0.0005707
AHSA2P	brown	0.836348	3.69805e-39	0.288139	0.000440645
IL10	green	0.9207	2.65535e-60	-0.192198	0.0205594
PPA2	green	0.86004	1.25322e-43	-0.206214	0.0128296
CCBE1	green	0.860337	1.08888e-43	-0.195444	0.0184802
MCM8	green	0.909949	1.59492e-56	-0.1908	0.0215159
AKR1D1	green	0.839979	8.52669e-40	-0.303656	0.000204879
YRDC	green	0.91944	7.83122e-60	-0.351424	1.4633e-05
RHBDL2	green	0.831605	2.38371e-38	-0.221837	0.0073259
GABPB2	green	0.898266	6.39212e-53	-0.180129	0.0301565
PLA2G2D	green	0.871465	4.34802e-46	-0.196836	0.0176457
GJC1	green	0.930677	2.5414e-64	-0.26361	0.00135688
BIRC3	green	0.856073	7.97378e-43	-0.572071	5.63598e-14
HYPK	green	0.852316	4.37204e-42	-0.258492	0.00169385
CSF2RA	green	0.925634	3.21274e-62	-0.303401	0.00020755
SPTLC1	green	0.813892	1.55016e-35	-0.24807	0.00262558
ZNF14	green	0.90327	2.08348e-54	-0.312133	0.000132378
LILRB1	green	0.88538	2.01204e-49	-0.204032	0.0138335
CDAN1	green	0.9104	1.13244e-56	-0.23494	0.00444815
NLRP8	green	0.939582	1.88226e-68	-0.2511	0.00231575
BLZF1	green	0.924653	7.91262e-62	-0.234631	0.00450234
IL17RD	green	0.892458	2.73739e-51	-0.174676	0.0356093
ZNF577	green	0.869642	1.11237e-45	-0.292443	0.000357856
DUSP19	green	0.80544	2.68447e-34	-0.332176	4.46822e-05
EID2B	green	0.887436	5.94942e-50	-0.271359	0.000961746
GRIPAP1	green	0.845609	8.14064e-41	-0.343336	2.36018e-05
TMEM17	green	0.855151	1.21613e-42	-0.291836	0.000368581
DDX51	green	0.868377	2.11676e-45	-0.223717	0.00683123
CATSPER2	green	0.91964	6.60716e-60	-0.337257	3.35163e-05
DAPP1	green	0.896552	1.9833e-52	-0.181956	0.0284959
FKBP14	green	0.920912	2.2109e-60	-0.372145	4.04458e-06
SLC44A4	green	0.845231	9.55912e-41	-0.209171	0.0115715
PNPT1	green	0.918347	1.97406e-59	-0.212356	0.0103386
PDE4C	green	0.872286	2.8345e-46	-0.227244	0.0059823
CCR6	green	0.802276	7.53438e-34	-0.288388	0.000435415
XRCC2	green	0.909223	2.75965e-56	-0.329004	5.33347e-05
ZNF430	green	0.920447	3.30587e-60	-0.187002	0.0243081
ZNF652	green	0.899945	2.0688e-53	-0.253845	0.002064
SLC16A12	green	0.924595	8.34332e-62	-0.319124	9.14222e-05
DTWD2	green	0.874157	1.05806e-46	-0.191657	0.0209253
RPL7L1	green	0.902422	3.77277e-54	-0.331879	4.54321e-05
SHCBP1	green	0.900452	1.46523e-53	-0.266929	0.00117231
MBD4	green	0.883098	7.57394e-49	-0.189145	0.022697
SLC5A8	green	0.824626	3.33612e-37	-0.18988	0.0221654
N4BP2	green	0.843823	1.73251e-40	-0.165986	0.0460096
ZNF549	green	0.898736	4.67215e-53	-0.292881	0.000350301
ROCK2	green	0.804267	3.94466e-34	-0.231809	0.00502376
ANKRD30B	green	0.905778	3.48961e-55	-0.176842	0.0333511
LOC729603	green	0.928851	1.52711e-63	-0.282195	0.000584228
TDRD1	green	0.815836	7.87912e-36	-0.244842	0.00299659
EIF2AK4	green	0.827431	1.17178e-37	-0.185147	0.0257822
IL18	green	0.909886	1.6734e-56	-0.172041	0.0385304
USP49	green	0.890915	7.16501e-51	-0.295985	0.000300795
CREB1	green	0.957255	6.36236e-79	-0.299436	0.000253403
CDKN2AIPNL	green	0.948683	2.21806e-73	-0.348252	1.76779e-05
FKTN	green	0.924585	8.42227e-62	-0.263779	0.00134687
HSD17B7	green	0.890419	9.73128e-51	-0.187686	0.0237839
MAGT1	green	0.92348	2.28962e-61	-0.308367	0.000160988
ORC6	green	0.802889	6.17827e-34	-0.220132	0.00780211
SLC25A51	green	0.855194	1.1923e-42	-0.198987	0.0164208
CFAP74	green	0.887904	4.49383e-50	-0.187316	0.0240663
MIGA1	green	0.826131	1.90771e-37	-0.223939	0.00677459
FSD2	greenyellow	0.930529	2.94488e-64	0.440475	2.95234e-08
MYOM2	greenyellow	0.853771	2.27543e-42	0.417162	1.79122e-07
LMCD1	greenyellow	-0.871059	5.36725e-46	-0.618718	1.10199e-16
ACOX2	greenyellow	0.829053	6.3442e-38	0.527631	9.16601e-12
SDHA	greenyellow	0.808215	1.06899e-34	0.241975	0.00336521
PFKM	greenyellow	0.820645	1.4275e-36	0.291478	0.000375059
PRELID1	greenyellow	-0.878568	9.71083e-48	-0.392092	1.07548e-06
PTPN1	greenyellow	-0.811804	3.17785e-35	-0.495799	2.28589e-10
LRRC20	greenyellow	0.837843	2.03026e-39	0.340286	2.81682e-05
TMLHE	greenyellow	0.801979	8.29297e-34	0.484952	6.35511e-10
ALDH5A1	greenyellow	0.821693	9.76996e-37	0.571294	6.20166e-14
ELOVL6	greenyellow	-0.898106	7.11285e-53	-0.352732	1.35271e-05
CAND2	greenyellow	0.867864	2.74277e-45	0.482967	7.63284e-10
ABHD5	greenyellow	-0.848757	2.09996e-41	-0.450022	1.35565e-08
AMT	greenyellow	0.80535	2.76554e-34	0.442986	2.41144e-08
UCK2	greenyellow	-0.861046	7.76907e-44	-0.337772	3.25445e-05
GCOM1	greenyellow	0.869028	1.52127e-45	0.498961	1.68523e-10
SH3RF2	greenyellow	0.811119	4.01353e-35	0.392902	1.01733e-06
ASB10	greenyellow	0.882604	1.00554e-48	0.230367	0.00531055
ACAT1	greenyellow	0.814101	1.44169e-35	0.459374	6.17787e-09
SDF2L1	greenyellow	-0.80659	1.83666e-34	-0.495494	2.35379e-10
COQ10A	greenyellow	0.844082	1.55348e-40	0.336039	3.5925e-05
MYH9	greenyellow	-0.893875	1.1167e-51	-0.476618	1.36107e-09
ZNF71	greenyellow	0.82753	1.12896e-37	0.371906	4.10705e-06
KLHL7	greenyellow	0.819278	2.332e-36	0.39688	7.7234e-07
TNNI3K	greenyellow	0.854767	1.44834e-42	0.428512	7.57423e-08
CHIC2	greenyellow	-0.814147	1.41892e-35	-0.462331	4.79463e-09
CCDC141	greenyellow	0.819783	1.94584e-36	0.422081	1.23833e-07
CMBL	greenyellow	0.886761	8.90011e-50	0.538063	2.96423e-12
HADH	greenyellow	0.885957	1.43255e-49	0.417355	1.76574e-07
SPHKAP	greenyellow	0.839558	1.01264e-39	0.346358	1.97713e-05
ZPR1	greenyellow	-0.805258	2.85068e-34	-0.336983	3.40444e-05
CIPC	greenyellow	0.801002	1.13547e-33	0.534168	4.5386e-12
RETREG1	greenyellow	0.814187	1.39943e-35	0.407615	3.60692e-07
TRUB1	grey60	0.800303	1.42044e-33	0.516744	2.85932e-11
ZNF277	grey60	0.831332	2.64878e-38	0.610612	3.50771e-16
MYOZ2	grey60	0.827063	1.34584e-37	0.568306	8.9385e-14
PDGFRB	grey60	-0.809816	6.24269e-35	-0.629374	2.28325e-17
ANKRA2	grey60	0.856013	8.19683e-43	0.602042	1.15157e-15
WDSUB1	grey60	0.858203	2.97259e-43	0.562842	1.7277e-13
ZNF25	grey60	0.813777	1.61314e-35	0.375743	3.20552e-06
COMMD10	grey60	0.822615	6.98548e-37	0.423447	1.11649e-07
ACADM	grey60	0.821931	8.96185e-37	0.53416	4.54286e-12
PHF3	grey60	0.84042	7.11565e-40	0.626108	3.72305e-17
ABCF1	grey60	-0.813511	1.76811e-35	-0.425095	9.84697e-08
LOC642897	grey60	0.816714	5.79033e-36	0.627479	3.03405e-17
LOC643888	grey60	0.853442	2.63839e-42	0.58599	9.72321e-15
ZEB1	grey60	0.817567	4.28502e-36	0.590821	5.1804e-15
TLCD4	grey60	0.818727	2.83891e-36	0.625197	4.2621e-17
MAP2K1	lightcyan	0.801255	1.04699e-33	-0.608273	4.86969e-16
GTF2E2	lightcyan	0.868603	1.88775e-45	-0.453441	1.01988e-08
CAV1	lightcyan	0.801923	8.44214e-34	-0.384403	1.81072e-06
PRPF4	lightcyan	0.816104	7.17447e-36	-0.442513	2.50538e-08
PEBP1	lightcyan	-0.831791	2.21789e-38	0.335779	3.64591e-05
RPS17	lightcyan	0.801337	1.01949e-33	-0.207998	0.0120573
CRY2	lightcyan	-0.819849	1.90023e-36	0.404834	4.40472e-07
SH3GLB1	lightcyan	0.854699	1.49406e-42	-0.391028	1.1568e-06
ANXA5	lightcyan	0.878848	8.32173e-48	-0.513627	3.93137e-11
CCT2	lightcyan	0.830405	3.78455e-38	-0.351277	1.4762e-05
CHMP4B	lightcyan	0.83125	2.73393e-38	-0.446971	1.74313e-08
YWHAZ	lightcyan	0.833364	1.20256e-38	-0.453097	1.04972e-08
EBNA1BP2	lightcyan	0.86186	5.26013e-44	-0.394367	9.19533e-07
VMP1	lightcyan	0.806551	1.86055e-34	-0.541852	1.94826e-12
SFRP4	lightgreen	0.902791	2.91479e-54	0.609522	4.08883e-16
FMOD	lightgreen	0.864845	1.23307e-44	0.580593	1.94105e-14
RASL11B	lightgreen	0.82775	1.039e-37	0.719158	2.25964e-24
TMEM30B	lightgreen	0.862168	4.53681e-44	0.552157	6.05727e-13
RGS4	lightgreen	0.82577	2.18223e-37	0.70077	1.00102e-22
ACE2	lightgreen	0.870069	8.94116e-46	0.73485	6.94558e-26
FZD2	lightgreen	0.829172	6.06257e-38	0.677563	8.08131e-21
SLITRK4	lightgreen	0.811214	3.88624e-35	0.576641	3.19427e-14
THBS4	lightgreen	0.836761	3.13497e-39	0.642516	3.00798e-18
FRZB	lightgreen	0.88408	4.29704e-49	0.742188	1.25031e-26
PROS1	lightgreen	0.816072	7.25471e-36	0.789117	4.54124e-32
CTSK	lightgreen	0.829079	6.28104e-38	0.547223	1.06504e-12
HTRA1	lightgreen	0.855041	1.27856e-42	0.671155	2.53321e-20
OMD	lightgreen	0.85049	9.83014e-42	0.638411	5.72476e-18
HLA-DRA	lightyellow	0.800197	1.46914e-33	-0.412224	2.57969e-07
GBP1	lightyellow	0.823744	4.61886e-37	-0.245943	0.00286512
UBE2L6	lightyellow	0.858155	3.04046e-43	-0.431833	5.85213e-08
IFI35	lightyellow	0.811805	3.17638e-35	-0.401211	5.69899e-07
PLAAT4	lightyellow	0.85978	1.41765e-43	-0.376086	3.13478e-06
SH3KBP1	magenta	0.8526	3.85061e-42	-0.29951	0.000252464
FGF12	magenta	0.813611	1.70795e-35	-0.274816	0.000822131
DDAH1	magenta	-0.869555	1.16301e-45	0.342358	2.49844e-05
CORIN	magenta	0.84876	2.09745e-41	-0.504718	9.59605e-11
MOCS2	midnightblue	0.820164	1.69715e-36	0.317939	9.7405e-05
GLO1	midnightblue	0.812218	2.75858e-35	0.302046	0.000222273
MRPL40	midnightblue	0.82178	9.46757e-37	0.461927	4.96427e-09
GABARAPL2	midnightblue	0.858407	2.70262e-43	0.499113	1.66059e-10
UBE2A	midnightblue	0.838125	1.81168e-39	0.285502	0.000499755
MRPS33	midnightblue	0.826716	1.53304e-37	0.410503	2.92527e-07
PAIP2	midnightblue	0.86305	2.96276e-44	0.336709	3.45797e-05
DCTN6	midnightblue	0.857721	3.72273e-43	0.510934	5.16276e-11
IAH1	midnightblue	0.835969	4.30232e-39	0.553982	4.90416e-13
LYRM2	midnightblue	0.878884	8.15486e-48	0.488262	4.66905e-10
SKP1	midnightblue	0.804516	3.63567e-34	0.616566	1.50336e-16
ATP5MG	midnightblue	0.852297	4.40993e-42	0.394916	8.85272e-07
GNA13	pink	0.835205	5.82533e-39	-0.396995	7.66181e-07
PAPOLA	pink	0.828845	6.86532e-38	-0.245249	0.00294733
CLIC4	pink	0.832372	1.77048e-38	-0.228034	0.00580546
USP38	pink	0.889287	1.94653e-50	-0.360946	8.19445e-06
CNIH4	pink	0.861746	5.55847e-44	-0.357461	1.01535e-05
RAB8B	pink	0.827694	1.06118e-37	-0.497483	1.94409e-10
SLC38A2	pink	0.887008	7.68265e-50	-0.443108	2.38776e-08
NOC3L	pink	0.847454	3.69398e-41	-0.181581	0.0288298
ARPC5	pink	0.849138	1.77877e-41	-0.308794	0.000157476
GSPT1	pink	0.814105	1.43973e-35	-0.358996	9.24175e-06
ACTR3	pink	0.803053	5.858e-34	-0.196045	0.0181161
VAMP7	pink	0.817192	4.89287e-36	-0.169726	0.0412596
TRA2B	pink	0.812608	2.41264e-35	-0.195787	0.0182712
RETSAT	yellow	0.801235	1.05351e-33	-0.333901	4.05489e-05
DPAGT1	yellow	0.802737	6.48929e-34	-0.524608	1.26218e-11
ALG9	yellow	0.830166	4.14765e-38	-0.436456	4.06817e-08
USP7	yellow	0.840706	6.32922e-40	-0.225919	0.00628932
GRAMD1A	yellow	0.844988	1.05963e-40	-0.491255	3.52351e-10
SLC35C1	yellow	0.808483	9.77493e-35	-0.205717	0.0130524
DAZAP1	yellow	0.904102	1.1583e-54	-0.419682	1.4837e-07
PSME2	yellow	0.837362	2.46349e-39	-0.364019	6.76892e-06
CD63	yellow	0.801938	8.40352e-34	-0.343767	2.30148e-05
NAT9	yellow	0.817084	5.08244e-36	-0.392136	1.07226e-06
ADPRHL2	yellow	0.832925	1.42778e-38	-0.233679	0.00467248
SLC27A3	yellow	0.814236	1.37601e-35	-0.182995	0.0275865
SPNS1	yellow	0.846274	6.12876e-41	-0.513988	3.78946e-11
STX4	yellow	0.882065	1.3678e-48	-0.362186	7.58792e-06
TM9SF3	yellow	0.821296	1.12814e-36	-0.254072	0.00204429
